# Supplementary material for: Identification of Differentially Expressed Genes Triggered by Aberrant Methylation in Idiopathic Pulmonary Fibrosis Using Integrated Bioinformatic Analysis
Source: Research Square preprint supplement (doi:10.21203/rs.3.rs-136553/v1), 2020-12-31
Supplement: Supplementary file 1 [file 507ea7f39c4c4039d4a183c9.xlsx]

## Sheet: GSE53845 diffEXP
Gene	logFC	adj.P.Val
TIMP4	-2.81823	1.37e-09
C9orf5	-1.20525	1.48e-08
SOX4	1.80813	1.58e-08
FMO5	-2.80475	1.58e-08
DCXR	-1.63181	2.32e-08
OLAH	-1.1425	5.47e-08
C20orf103	3.3539	5.64e-08
PNMT	-6.0749	1.04e-07
PLA2G4F	-1.98825	1.2e-07
SYNDIG1	2.16129	1.2e-07
CD3G	2.17117	1.2e-07
CCK	-2.23268	1.2e-07
ADIPOR2	-1.1832	1.2e-07
PLLP	-2.37445	1.2e-07
ST6GALNAC3	-1.95766	1.2e-07
WNT10A	2.10649	1.44e-07
VSIG10	-2.09522	1.53e-07
DIO2	1.74149	1.54e-07
UBD	5.60663	1.81e-07
MCCC1	-1.96552	1.81e-07
LINC00340	1.22804	1.84e-07
PHLDB3	1.33768	2.15e-07
ACSS2	-1.10143	2.21e-07
NECAB1	-1.59576	2.47e-07
ECHDC3	-2.11095	2.94e-07
GLI1	1.83233	3.24e-07
FHL2	3.47357	3.24e-07
TOX2	-2.42755	3.24e-07
PSD3	1.29779	3.24e-07
FKBP5	-4.03795	3.32e-07
HIF3A	-2.47403	3.55e-07
PMM1	-1.42802	3.59e-07
SYTL2	1.64835	3.61e-07
THY1	2.90846	3.68e-07
LGALS2	4.64938	4.24e-07
BTNL9	-4.35194	4.51e-07
EDNRB	-3.21293	4.66e-07
LSS	-1.11757	4.66e-07
SLCO4A1	-3.17405	4.7e-07
SAMD11	2.01322	4.7e-07
ADORA3	-1.74156	4.72e-07
CD24	3.61714	4.72e-07
CD200	1.78006	4.88e-07
TTN	-1.75936	4.96e-07
GPM6B	-2.52965	5.15e-07
EPDR1	-1.14851	5.15e-07
NRBP2	-1.17204	5.18e-07
SFRP2	3.70419	5.18e-07
SIGLEC10	-1.52212	5.18e-07
FRMD6	1.17341	5.18e-07
KCNMB4	-2.17353	5.61e-07
ADRA1B	-2.23368	6.06e-07
CALCOCO2	-1.32946	6.06e-07
ACE2	-2.18778	6.22e-07
ADAMTS14	1.40304	6.46e-07
MXRA5	1.8865	6.96e-07
HS6ST2	2.07415	8.04e-07
NEBL	-2.06216	8.41e-07
CD28	3.1444	8.42e-07
ITGA10	-1.141	8.6e-07
HOMER3	1.21109	9.68e-07
BLVRB	-1.17891	9.81e-07
KLF15	-1.56412	1.06e-06
RS1	-1.6751	1.07e-06
CORO6	-2.69785	1.07e-06
ADAMTS2	-1.1561	1.21e-06
FKBP1B	-1.64427	1.22e-06
FAM167A	-1.7308	1.24e-06
IP6K3	-2.14723	1.27e-06
REPS2	-1.89612	1.28e-06
SCNN1A	-2.2666	1.3e-06
INPP5A	-1.0516	1.33e-06
LRRN1	2.30578	1.36e-06
SMO	2.26912	1.36e-06
HYAL1	-1.66307	1.36e-06
RNASE2	-1.93349	1.36e-06
ODAM	-1.82266	1.37e-06
ACADL	-2.54842	1.4e-06
MKNK2	-1.24005	1.42e-06
TCTA	-1.14445	1.72e-06
PTPRG	-1.95829	1.72e-06
MDK	3.35024	1.72e-06
C4orf48	1.63834	1.72e-06
TMEM41B	-1.14793	1.72e-06
SORT1	-1.23206	1.72e-06
PIM2	3.0611	1.72e-06
GSTA4	-1.7241	1.78e-06
LOC100506798	3.48523	1.86e-06
ZNF385B	-1.74059	1.87e-06
CCND2	1.16408	1.9e-06
SYTL4	-1.4679	1.9e-06
HSD17B4	-1.07952	1.9e-06
NPR1	-2.61588	1.91e-06
KLRG2	-2.15878	2e-06
P2RY1	-3.0255	2.01e-06
MPST	-1.34342	2.13e-06
MZB1	3.35987	2.14e-06
CTNNBIP1	-2.2783	2.14e-06
ECEL1P2	-2.23885	2.14e-06
C5orf38	-1.1922	2.21e-06
CD96	1.38484	2.39e-06
PDLIM4	2.80024	2.39e-06
PLA1A	-2.64069	2.39e-06
LDHD	-1.5664	2.39e-06
WBSCR17	-1.03405	2.44e-06
GPX3	-4.29618	2.67e-06
UNC13B	-2.00006	2.71e-06
CIB2	1.12143	2.71e-06
KIAA0408	-1.64346	2.71e-06
PRRX2	2.01198	2.93e-06
IGLL1	2.56128	2.96e-06
GNMT	-1.03218	3.25e-06
GFI1	1.49865	3.36e-06
COL14A1	2.36466	3.44e-06
CA2	-2.4186	3.44e-06
TGFBR3	-2.02388	3.55e-06
SPTSSA	-1.23436	3.55e-06
ALPP	-2.06536	3.6e-06
FAM105A	-2.59543	3.6e-06
GPD1L	-1.12591	3.64e-06
CDH3	2.72415	4.11e-06
FXYD4	-1.1761	4.11e-06
LIFR	-2.29177	4.18e-06
MGST1	-1.36154	4.18e-06
AFF2	-1.38363	4.26e-06
TCN2	-1.44861	4.33e-06
C3orf55	-1.281	4.39e-06
B3GALNT1	-1.36412	4.62e-06
CTHRC1	3.76201	4.69e-06
UBASH3A	1.24017	4.87e-06
CPNE2	-1.29184	4.88e-06
HHIP	-2.48664	4.88e-06
NOXO1	-1.68329	4.9e-06
WASF3	-1.66533	4.95e-06
PTH1R	-2.1815	4.95e-06
STXBP6	-2.00308	4.95e-06
RNASE3	-1.0685	4.95e-06
GFOD1	-2.15291	5.05e-06
MAOA	-3.68658	5.13e-06
MYZAP	-3.19653	5.13e-06
GOLM1	1.30607	5.13e-06
CA4	-5.40017	5.14e-06
HPCAL1	-1.57812	5.2e-06
FNBP1L	-1.34388	5.38e-06
CD1A	2.16475	5.38e-06
TMEM38A	-1.20991	5.42e-06
KRT17	4.20555	5.73e-06
BCL11B	1.32502	5.76e-06
LIN7A	-1.25109	5.76e-06
SLC48A1	-1.31128	5.79e-06
SULT1A4	-1.50209	5.79e-06
P2RY6	1.41373	5.79e-06
SLC19A3	-1.14304	5.81e-06
CFB	2.2177	5.92e-06
LCN6	-1.8761	6.28e-06
SULT1B1	-1.54236	6.36e-06
NHS	1.62289	6.4e-06
LCK	2.27018	6.4e-06
CPZ	2.46315	6.47e-06
LPHN2	-2.48455	6.78e-06
CXXC5	1.1002	6.78e-06
ABCC8	-3.86422	7.02e-06
AKR1C3	-2.03099	7.02e-06
ALDH6A1	-1.12418	7.11e-06
IL1R2	-4.32833	7.11e-06
SCAMP5	1.87625	7.25e-06
ASPG	-1.2687	7.54e-06
METTL7A	-1.59372	7.62e-06
C11orf9	-2.0637	7.77e-06
CDH19	-1.27735	7.8e-06
FZD5	-1.74167	8.11e-06
IL1RL1	-5.77641	8.32e-06
LINC00472	-1.40154	8.38e-06
KIAA1549	-1.37099	8.4e-06
TNNT2	-2.08476	8.52e-06
SLC1A1	-2.37893	8.91e-06
HYAL2	-3.27747	8.99e-06
SOX13	-1.55176	9.06e-06
PIP5K1B	-3.00591	9.14e-06
FAM46B	-1.25563	9.14e-06
PLAG1	-1.46097	9.23e-06
SULT1A1	-1.70409	9.28e-06
EPHB2	1.07543	9.33e-06
SULF2	2.02439	9.47e-06
ESYT3	-1.10415	9.56e-06
BAI2	1.31144	9.56e-06
OSTBETA	-1.96069	9.67e-06
RXFP1	-1.09611	9.72e-06
ITPRIPL1	1.00378	9.72e-06
TNFRSF18	1.4784	9.72e-06
VIPR1	-5.72846	9.73e-06
SIDT1	1.0276	9.9e-06
SCG5	3.65118	1.01e-05
LOC389023	1.27115	1.01e-05
IL23A	1.64993	1.04e-05
SERPIND1	2.85337	1.06e-05
C16orf74	1.58051	1.07e-05
KIAA1211	1.07024	1.13e-05
TCEAL4	-1.72264	1.14e-05
PPAPDC1B	1.02989	1.16e-05
ARRB1	-2.19899	1.16e-05
ANKS1A	-1.91505	1.16e-05
SH2D1A	1.8505	1.2e-05
CACNA2D3	-1.26817	1.23e-05
SPSB2	-1.62035	1.26e-05
F2RL3	-1.62659	1.27e-05
SLC35F2	2.30761	1.27e-05
SH3BP5	-1.80779	1.27e-05
C10orf47	-1.00434	1.3e-05
C1orf21	-1.40115	1.3e-05
C1orf115	-1.43903	1.31e-05
GDF15	2.92153	1.31e-05
TMEM180	-1.59071	1.32e-05
NUDT16	-1.95636	1.36e-05
TNFRSF21	1.44969	1.38e-05
GNA11	-1.20994	1.39e-05
SMAD7	-1.22229	1.4e-05
GLDN	-2.50202	1.4e-05
SUN2	-1.02381	1.45e-05
POU2AF1	4.45552	1.45e-05
SRPX	-1.88227	1.45e-05
BCL2L2	-1.21974	1.5e-05
PRX	-3.02771	1.59e-05
ANGPTL7	-1.59632	1.59e-05
DKFZP564C152	-1.26598	1.63e-05
ARHGAP6	-1.34671	1.65e-05
TSPAN7	-1.66461	1.67e-05
GGT2	-1.51499	1.67e-05
GATA2	-1.25892	1.7e-05
GJB2	1.76355	1.75e-05
EPB41L5	-1.23021	1.75e-05
TBX3	-1.86659	1.76e-05
PPM1J	1.06279	1.8e-05
RHOH	1.97444	1.82e-05
PHEX	-1.38868	1.83e-05
ANXA3	-3.201	1.84e-05
CCDC85A	-3.65676	1.87e-05
SULT1A2	-2.20483	1.87e-05
FAM102A	1.02989	1.89e-05
PPL	-1.40717	1.9e-05
ZAP70	1.81019	1.94e-05
CD300LG	-1.07016	1.96e-05
FIBIN	-2.07202	1.98e-05
GCNT3	1.43394	1.98e-05
ITLN2	-5.64952	2e-05
DEFA4	-2.33711	2.04e-05
IGSF9	1.65874	2.04e-05
CGN	-1.98577	2.1e-05
TRO	1.52114	2.12e-05
ATOH8	-2.99837	2.22e-05
SMAD6	-2.12215	2.24e-05
LOC644662	-1.5151	2.24e-05
C12orf45	1.05053	2.25e-05
HECW2	-1.70434	2.28e-05
SLC44A1	-1.30009	2.3e-05
SIT1	1.39098	2.3e-05
TRPC3	-2.01467	2.33e-05
LOC254057	-1.22235	2.35e-05
RAB33A	1.45373	2.38e-05
ZBTB16	-5.37187	2.38e-05
ARHGAP10	-1.26868	2.4e-05
LOC283174	1.36202	2.42e-05
STAMBPL1	1.65441	2.43e-05
ARHGAP22	1.61529	2.47e-05
INMT	-2.94826	2.55e-05
MPO	-1.02329	2.59e-05
TFCP2L1	-2.83574	2.62e-05
LOC100507487	-2.14601	2.69e-05
SLC27A3	-2.20323	2.7e-05
C14orf132	-2.47267	2.73e-05
ARNTL2	1.91409	2.73e-05
NDRG4	-3.95195	2.76e-05
COL15A1	1.72027	2.77e-05
GGT3P	-1.45135	2.77e-05
IGLL5	3.36779	2.8e-05
ZFP106	-1.19186	2.82e-05
BFSP2	1.15315	2.82e-05
PINK1	-1.27681	2.82e-05
ADD1	-1.07178	2.82e-05
SNX24	-1.23841	2.82e-05
IRF4	1.28383	2.83e-05
CD69	1.86375	2.93e-05
TMEM100	-5.85021	2.95e-05
MEX3A	2.60134	2.96e-05
CDKN2A	2.75982	2.99e-05
PLA2G16	-1.88388	2.99e-05
CD1C	1.48677	2.99e-05
MMP11	3.07601	3.03e-05
LAMA3	-1.70329	3.09e-05
CYP3A5	-1.48072	3.09e-05
FMN1	-1.24237	3.12e-05
TMEM121	1.36873	3.12e-05
IGFBP4	1.3187	3.14e-05
ARG1	-3.78632	3.19e-05
SYNJ2	1.1361	3.22e-05
PHF17	-1.23429	3.22e-05
SPP1	5.48112	3.26e-05
ARHGAP31	-2.05479	3.3e-05
BMX	-1.44495	3.3e-05
ARL4C	1.39901	3.3e-05
TMPRSS4	3.35078	3.3e-05
CYP3A7	-4.20684	3.34e-05
CD3D	3.31565	3.36e-05
USHBP1	-2.32136	3.37e-05
ITM2C	1.27663	3.37e-05
BCL11A	1.3747	3.37e-05
CYP3A4	-2.88172	3.37e-05
CPE	1.28621	3.37e-05
B3GNT3	2.61438	3.45e-05
GPR133	-2.34058	3.53e-05
EGLN2	-1.05102	3.55e-05
TACC2	-1.0708	3.55e-05
SVOPL	1.07931	3.55e-05
TMEM158	1.60404	3.57e-05
TXNDC5	1.16473	3.63e-05
ACCN2	1.87997	3.64e-05
C1orf210	-1.13305	3.7e-05
GPER	-2.0662	3.71e-05
STARD13	-1.19183	3.71e-05
GGTLC2	-1.49502	3.73e-05
C11orf67	-1.2754	3.74e-05
STEAP1	2.56531	3.8e-05
STARD8	-2.2048	3.8e-05
GGT1	-1.52546	3.83e-05
CD70	2.52357	3.84e-05
IL13RA2	3.6053	3.85e-05
SEC14L4	-3.08036	3.87e-05
FUT8	1.25068	3.87e-05
LOC100507165	2.31134	3.9e-05
LGI3	-2.32773	3.92e-05
D4S234E	1.32704	3.95e-05
CSF2	-1.0537	3.95e-05
LTBP1	1.42861	3.95e-05
SERTM1	-2.11009	3.95e-05
PGC	-4.14474	3.99e-05
PRR7	1.10454	3.99e-05
SOSTDC1	-3.10857	3.99e-05
EMP2	-3.63408	4.14e-05
LOC90246	-1.08815	4.18e-05
TMTC1	-2.12948	4.19e-05
AK1	-1.55658	4.19e-05
RBP2	-1.21268	4.19e-05
NDRG2	-1.74841	4.24e-05
OCLN	-1.61953	4.26e-05
VMP1	1.97824	4.26e-05
CASKIN2	-1.51402	4.26e-05
TRAF5	1.22463	4.27e-05
CRABP2	1.50447	4.31e-05
NLGN2	1.06838	4.38e-05
PTPRB	-3.50327	4.41e-05
PPP2R5A	-1.26471	4.41e-05
FLT3	-1.28928	4.42e-05
CTDSP2	-1.02822	4.67e-05
PAPSS2	-3.10696	4.71e-05
USP54	-1.05114	4.71e-05
AGTR1	-2.03679	4.77e-05
UBTD1	-1.36833	4.77e-05
FCHO2	-1.54056	4.88e-05
VEPH1	-2.72302	4.89e-05
SPTBN1	-2.1557	5.03e-05
SECISBP2L	-1.42322	5.03e-05
SH3BGRL2	-1.11824	5.06e-05
SLC6A4	-5.48946	5.08e-05
LOXL1	1.98756	5.1e-05
FGF12	-1.64158	5.11e-05
GLI2	1.12005	5.15e-05
PRODH	-1.55032	5.16e-05
LAMB1	-1.72375	5.2e-05
BDKRB1	3.03744	5.26e-05
PPP2R2B	1.08327	5.27e-05
MMP1	6.83017	5.37e-05
HSD17B6	-3.76272	5.4e-05
PTPRM	-1.80119	5.4e-05
MARVELD2	-1.26551	5.46e-05
DERL3	2.04126	5.46e-05
BAAT	1.83832	5.59e-05
ADH1B	-2.36236	5.59e-05
SDR16C5	-3.19921	5.59e-05
DOK5	1.01492	5.69e-05
PCP4	2.88646	5.7e-05
SYBU	-2.06154	5.74e-05
SLCO4C1	-1.72819	5.81e-05
PLA2G1B	-5.6859	6.02e-05
ALDH1B1	1.35287	6.05e-05
LEPREL1	-1.83076	6.14e-05
MS4A15	-1.45401	6.14e-05
DZIP1	1.27869	6.14e-05
HIST1H4J	1.13065	6.33e-05
GLIS1	1.27744	6.33e-05
RNF128	-1.3217	6.35e-05
RADIL	-1.07581	6.35e-05
HSH2D	1.52703	6.46e-05
MIR100HG	1.58381	6.71e-05
PLAU	1.80723	6.71e-05
CHEK2	1.55422	6.81e-05
C9orf150	-1.41795	6.9e-05
BACE2	1.59168	6.97e-05
SLC46A2	-1.67189	6.97e-05
WNT3A	-3.6529	7.09e-05
PCTP	-1.74192	7.09e-05
MFSD2A	-1.56745	7.12e-05
WWC2	-1.73716	7.12e-05
PLCXD3	-1.37232	7.15e-05
TMBIM1	-1.00511	7.15e-05
BEAN1	1.51622	7.16e-05
DEFA3	-6.29046	7.16e-05
STEAP3	1.1202	7.24e-05
VWCE	3.04428	7.34e-05
PTPN21	-1.01752	7.34e-05
GHR	-1.43672	7.34e-05
CAV1	-1.82267	7.39e-05
NPR3	-1.53236	7.4e-05
OSR2	1.63737	7.45e-05
KCNN4	1.90563	7.46e-05
PLIN5	-1.25046	7.5e-05
LOC285141	-1.86956	7.5e-05
SNX25	-1.69823	7.56e-05
TRIM47	1.15282	7.87e-05
CLDN1	1.82465	8.09e-05
SLC39A8	-2.72129	8.12e-05
TRAT1	1.1906	8.12e-05
CP	3.99811	8.19e-05
ANKRD20A9P	-1.8756	8.54e-05
SEMA6A	-1.10487	8.55e-05
GPR87	2.55417	8.62e-05
SH2D3C	-2.81369	8.62e-05
MTHFD1L	1.34773	8.69e-05
CRTAC1	-3.42471	8.69e-05
SACS	1.56232	8.72e-05
ARHGEF26	-2.92202	8.72e-05
PDK4	-3.17778	8.73e-05
SLC30A1	1.15974	8.81e-05
FHDC1	-1.34171	8.83e-05
PDZD2	-2.78615	8.85e-05
CAV3	-1.19213	8.86e-05
MPP3	-2.60645	8.91e-05
TIMP3	-3.38048	8.96e-05
IL18R1	-2.77556	9e-05
SLC44A2	-1.5737	9.2e-05
FAM20C	1.12087	9.27e-05
CLEC4E	-4.03625	9.29e-05
PDK1	1.81295	9.31e-05
FAM189A1	-1.28079	9.36e-05
CDKN2D	-1.05207	9.43e-05
C1QTNF6	1.06349	9.43e-05
THBS2	3.05498	9.47e-05
LAMC3	-3.07631	9.47e-05
C12orf49	-1.07342	9.47e-05
GLUL	-1.62368	9.56e-05
SNCAIP	1.12095	9.58e-05
CFLAR	-1.21554	9.62e-05
ITGA4	1.3868	9.7e-05
OPHN1	-1.08195	9.77e-05
FAM107A	-4.17411	9.78e-05
TMEM229A	1.28082	9.81e-05
KLHL13	1.54204	0.000100237
TNC	1.17109	0.000100237
SEMA3C	1.02979	0.000100237
HRASLS2	-1.37498	0.000100237
BID	1.06024	0.000100237
COL7A1	1.70604	0.000101173
FBXO41	1.12811	0.000102295
CCBE1	-2.38991	0.000102544
PXMP4	-1.1356	0.000102838
STMN3	1.31505	0.000103331
TENC1	-2.51135	0.000103665
C5orf4	-2.60356	0.000104086
LEF1	1.62165	0.000104249
JSRP1	2.40561	0.000106442
BTNL8	-2.8953	0.000107803
CDH2	2.86216	0.00010821
NES	-1.39486	0.000109181
SYT15	-1.74093	0.000109181
CACNA1D	-1.28365	0.000110017
SDPR	-3.46894	0.000110118
LEPREL2	1.22029	0.000110703
TFPI2	2.66806	0.000111056
DAPK2	-2.99981	0.000111959
ZNF503-AS1	-1.45332	0.000112313
PDGFRA	-1.05522	0.000112408
RPH3AL	-1.34167	0.000114034
TSPAN5	1.06804	0.000115614
FAM174B	-1.6162	0.000117296
EFNA4	1.03125	0.000119285
ZNF366	-1.72991	0.000120681
CPNE7	1.3292	0.000123589
SDSL	1.20099	0.000125764
FZD4	-2.03608	0.000127168
SELENBP1	-1.91861	0.000127458
LRRC17	2.14458	0.00012867
KCNK3	-2.12245	0.00012893
INPP1	-1.06568	0.000129794
RIMKLA	-1.23141	0.000132872
PRTFDC1	1.32858	0.000135544
RENBP	-1.10168	0.000136215
P2RY8	1.69673	0.000137328
THBS4	2.01315	0.000137456
RIN2	-1.15566	0.000137456
PFKP	1.88044	0.000137907
RRAS	-1.94013	0.000137907
IL17RD	1.38666	0.000137919
FSTL3	-1.60091	0.000139785
GADD45A	1.9693	0.00014003
MYO9A	-1.15214	0.000141543
FUT1	-3.14505	0.000142001
LOC100507008	-1.52877	0.000142264
LRRN2	1.0782	0.000142389
ALCAM	-1.37137	0.000142491
RAMP3	-2.62239	0.000142729
TSPAN11	1.52464	0.000143029
FLJ30064	-1.5772	0.000143966
ALPK2	1.51483	0.00014398
CYBRD1	-1.51042	0.00014417
PPP1R9A	-1.42119	0.00014417
ENPP3	1.23969	0.00014472
ITGA11	2.51724	0.00014576
ZNF521	1.29628	0.00014584
IER5L	1.52395	0.000146151
OAF	1.32615	0.000146157
MERTK	-1.69858	0.000146157
FNDC1	2.04029	0.000146517
LOC400550	-2.82891	0.000149124
SLC4A11	1.3063	0.000150022
IL20RB	1.163	0.000151351
VSX1	-1.03164	0.000152405
SVEP1	-1.03764	0.000155777
TCF7	1.86219	0.000157177
DAAM2	-1.27946	0.000157235
PRRG4	-1.11251	0.000158631
RILP	-1.48272	0.000162658
TSPAN13	-1.76498	0.00016371
PRELP	-2.86305	0.000166145
PLEKHM3	-1.3159	0.000166145
TP53I3	-1.32187	0.00016793
F12	1.80647	0.000168613
CEACAM4	-2.51351	0.000169248
PHLDA1	1.60599	0.000169248
LOC643441	-1.87784	0.000169947
LYPD1	2.01185	0.00017176
S100A14	-1.43721	0.000173254
SCIN	-1.28886	0.000173391
LOC100507307	2.18339	0.000173391
C1orf228	1.26534	0.000173797
CSF3R	-1.83345	0.00017488
FGFR4	-1.07756	0.000175157
ANGPTL2	1.01862	0.000180305
RASIP1	-1.03957	0.000180305
PFKFB2	-1.17855	0.000180305
CDO1	-2.42563	0.000181214
ID1	-2.18415	0.000182717
ASAH1	-1.31348	0.000189042
MME	-1.74234	0.000189469
KLHL24	-1.20457	0.000189791
DFNA5	2.14965	0.000190023
LOC100506542	-3.02009	0.000191336
GGTLC1	-2.8599	0.000192138
PLK2	1.36806	0.000193667
RAMP2	-1.48466	0.000193923
LRCH2	-1.14402	0.000193923
CAB39L	-1.31591	0.000193923
LMAN1	1.16923	0.000195043
CABYR	1.94308	0.00019515
DEPDC7	1.64518	0.000196678
CPB2	-3.40537	0.000196678
FCN3	-5.68485	0.000197399
EHD2	-1.24009	0.000201385
TNFRSF17	2.7964	0.00020308
DOCK9	-2.6338	0.000205291
TMEM184A	1.56048	0.000205933
SPDYE5	-1.26529	0.000205957
GRAMD2	-1.01074	0.000207489
RASSF7	-1.40017	0.000207572
TMEM139	-1.99086	0.000207881
DSTN	-1.50509	0.00020961
GPR116	-1.61284	0.000210675
KIAA1199	1.7639	0.000211718
COL17A1	1.64436	0.00021656
INPP5K	-1.97462	0.000216647
FAM13A-AS1	-1.30406	0.000217341
HEBP1	-1.00317	0.000218319
NOL3	-1.06396	0.000218319
AATK	-1.34649	0.000221195
GALNTL1	1.32702	0.000222742
PODXL	-1.40556	0.000222742
PPFIBP1	-1.19774	0.000225276
SPAG4	1.78548	0.000226846
TCF3	1.32069	0.000226846
MID1IP1	-1.03228	0.000226846
FNDC4	1.40958	0.000227554
CSPG4	-1.32527	0.000228675
PACSIN1	1.44347	0.000228675
ADRB1	-1.96367	0.000228675
MYLIP	-1.30256	0.0002316
LRRC8A	-1.15732	0.0002316
EPAS1	-3.91819	0.000232665
PRKD1	-1.36597	0.000235395
MGC16121	1.467	0.000239315
NCS1	1.18343	0.0002394
KDR	-1.66153	0.000239529
PRKCD	-1.15379	0.000240444
PPARGC1B	-1.51006	0.00024124
BRI3	-1.73391	0.000242576
AOX1	-2.01948	0.000243456
BTNL3	-1.73545	0.000247377
SCN7A	-3.42027	0.000248565
43892	-1.53188	0.000248866
PON2	-1.53995	0.000250305
PEBP4	-4.51058	0.0002517
ENC1	1.0821	0.000253241
WT1-AS	1.17217	0.000253241
ATP13A4	-1.20248	0.000253256
ALOX15B	-4.06292	0.000254952
PPP2R3B	1.07787	0.000259303
PCDH12	-2.2385	0.000259303
SHE	-1.85295	0.000259708
MMP28	-1.81011	0.000259708
EXOC3L1	-1.55068	0.000259708
CD302	-2.35804	0.000261052
LOC100505875	-1.58915	0.000264959
OXTR	1.33409	0.00026582
C20orf160	-2.2943	0.000269902
RPS6KA2	-2.85467	0.00027263
CCDC167	1.09684	0.000275566
MT1JP	-3.76646	0.000275697
ABHD6	-1.12114	0.00027674
NEDD9	-1.59124	0.000280068
PVRIG	1.15483	0.000280834
PREX1	-1.90885	0.000282217
WFS1	-1.43786	0.000282217
TNNC1	-3.03351	0.000287028
KL	-1.88799	0.000287109
CMTM8	-2.07099	0.000287634
CES1	-1.93975	0.000289432
HSBP1L1	-1.04043	0.000290926
PCSK2	-1.96928	0.000291235
ARRDC2	-2.27158	0.000291531
FRMD5	1.11026	0.000292326
ITGA3	-1.00075	0.000293163
DKK2	-1.15074	0.000295536
HTR3C	-2.24184	0.000298058
BMP7	1.6001	0.000300797
KIAA1324L	-1.43142	0.000304479
EFNB1	-2.3889	0.000305589
LOC375295	1.49111	0.000306527
COL10A1	2.63298	0.000306882
TCEAL1	-1.19051	0.000307543
ACSL1	-1.98867	0.000312713
ZP3	1.03247	0.000314345
TPST2	-1.49967	0.000318141
GXYLT2	1.36542	0.000318141
ZHX3	-1.35343	0.000319259
DISP1	-2.39711	0.000319688
SEMA3B	-1.02967	0.00032094
FAM169A	1.74449	0.000322265
BAIAP2	-1.48677	0.000323545
CTDSPL	-1.06858	0.000325171
CPXM1	1.26975	0.000325171
KRT14	1.73921	0.000325279
FHL5	-1.47555	0.000325758
GLOD5	-1.0387	0.000328076
ADHFE1	-2.34386	0.000333445
IGJ	3.67529	0.000335649
CAV2	-1.82953	0.000342863
NLRP12	-1.31245	0.000343839
STARD9	-1.30921	0.0003454
PRKCE	-1.73373	0.000346851
MXD4	-1.32028	0.000349627
CHST6	2.71574	0.000349627
C2	-1.11823	0.000351575
ZBED2	-3.60734	0.00035185
TCAP	-2.24307	0.000352668
MMP3	2.62679	0.000353266
PRR15L	-2.99246	0.000366815
GALNTL4	-2.83862	0.00036699
LIMCH1	-2.45394	0.000369764
DGKG	-1.77567	0.000370426
PIK3R1	-1.63153	0.000371506
ANKRD29	-2.02533	0.000374106
UBL3	-1.01776	0.000374176
CPM	-2.64066	0.000374185
CAPN6	1.17068	0.000376742
TLR3	-1.12794	0.000385951
BEX5	-1.96739	0.000386121
PPP1R14A	-2.79909	0.000386307
CDH5	-1.6429	0.000387706
SUSD3	1.23632	0.000396564
FAM83D	2.95326	0.000398148
LOC100506328	-1.90196	0.000398148
IRAK3	-2.24306	0.000398148
MYBPC2	1.18133	0.000398451
NLRP7	1.31561	0.000402756
IL20RA	-1.3878	0.000402762
REEP2	2.1955	0.000403183
ALDH18A1	1.79342	0.00040791
PHYHD1	-1.52463	0.00041135
RUNX1	1.24654	0.000415059
ZFHX3	-1.32461	0.000417557
CNR1	-1.42917	0.000417557
LAMC1	-1.02277	0.00041909
44075	1.04306	0.000420635
ENG	-1.12074	0.000421249
TECPR1	-1.44326	0.000428817
HRCT1	-2.49637	0.000428817
CACNA2D2	-3.43976	0.000428817
C3orf32	2.27669	0.000428817
FGGY	-1.34428	0.000432293
S100A12	-4.0279	0.000432293
BAI3	-1.59866	0.000434156
CLIC2	-1.3198	0.000437648
CDKL5	-2.40184	0.00044397
DAPP1	1.29279	0.000451985
FHOD3	2.02086	0.000451985
CLDN18	-3.86622	0.000452
PTPRZ1	1.47881	0.000454915
RNF112	-1.51853	0.000454915
SNTB1	-1.02049	0.000455288
SMOC1	1.3329	0.000456473
NXF3	-1.70006	0.000456473
LYVE1	-2.1536	0.000456473
TUBB3	2.07066	0.000456609
PHACTR3	-2.92329	0.000456609
IRX2	-2.47399	0.000458472
TEK	-3.56879	0.000472986
RHOBTB2	-2.61559	0.000477826
RIMS3	-1.35592	0.000479636
PLOD2	1.44406	0.000484073
MAGI3	-1.72042	0.000493134
NOTCH4	-2.43766	0.000494027
C19orf28	1.0134	0.000501836
UCK2	1.60736	0.000503236
KCNB1	-1.21339	0.000503236
GPR146	-1.2949	0.00050761
MYL12A	-1.29012	0.00050761
EFNB2	-1.44155	0.00050784
STX11	-2.21425	0.000510949
MLPH	-1.18514	0.000517081
WWC3	-2.07164	0.000519185
ANGPTL1	-1.89316	0.000529146
ZC3H7B	-1.05916	0.000529146
ST6GALNAC5	-1.41965	0.000533173
SORBS3	-1.24706	0.000534244
ARHGAP29	-1.3817	0.000534576
NOVA2	-1.32538	0.000534576
FLNC	1.7071	0.000538523
SLCO2A1	-4.56293	0.000539014
CARD6	-1.69439	0.000546666
TSC22D3	-1.92874	0.000550321
C12orf75	2.49652	0.000559233
GABPB1	1.09498	0.000560043
LRRN3	-1.54499	0.000560424
TMEM45A	1.97168	0.000573649
VAMP5	-1.92827	0.000573671
NCKAP5	-1.93696	0.00058035
IFNGR1	-2.9868	0.00058035
ARAP3	-1.61962	0.00058035
GNAQ	-1.26407	0.00058035
RNF144B	-2.9018	0.000588291
PER1	-1.33055	0.000590151
BTBD11	1.30595	0.000600549
APOD	-1.29908	0.000601514
MT1M	-3.95784	0.000602758
MFNG	-1.60865	0.00060288
FOLR3	-1.61078	0.000604364
COCH	2.03551	0.000609666
GALNTL2	-2.09399	0.000616244
S100A4	-1.43288	0.00061758
SLC22A3	-1.39329	0.000617959
MX2	1.16216	0.000622964
PTPN12	-1.10861	0.000624758
SH3D19	-1.80575	0.000629709
ACCS	-1.22268	0.000636848
SDCBP2	-1.19705	0.000636848
PRSS2	3.37237	0.000636848
MFAP2	1.80873	0.000640222
LOC100131170	-1.26839	0.000645346
ALDH3B1	-1.2826	0.000645951
CXCL14	3.8521	0.00064632
CNTN6	-1.63308	0.000647686
RAPGEF5	-2.37182	0.000653156
LOC100133920	1.59011	0.000657378
CD38	1.8528	0.000657618
LIPH	-1.45878	0.000657628
LIF	1.13218	0.000663178
HPGD	-3.26535	0.000668538
MAP3K6	-2.24259	0.000675952
TIMM8A	1.11595	0.000678631
BAG2	1.02933	0.000678959
RGN	-2.53004	0.000681262
LGI2	1.16206	0.000683518
TMCC3	-1.28042	0.000688976
TDP1	1.65548	0.000689518
CD8B	1.98172	0.00068987
B3GNT7	-1.17292	0.000698278
CEBPA	-1.18445	0.000698278
LOC401431	1.10889	0.000699178
XBP1	1.38249	0.000699357
PRINS	-3.19591	0.000706451
S100B	1.57926	0.000718944
SCUBE2	1.67217	0.00073058
MEGF9	-1.74473	0.000734144
ARHGEF26-AS1	-1.38764	0.000735601
CLMP	2.02121	0.000735601
LOC100507055	-2.84329	0.000742767
ETV1	-1.32837	0.000745018
SLC7A5	1.69913	0.000755131
BDKRB2	3.10824	0.000757391
NFKBIE	1.40581	0.000761812
LEMD1	1.35778	0.000761843
ADAM23	1.39577	0.000762069
TUBB2B	2.59141	0.000763525
SIX4	1.10598	0.000767813
IGFBP2	1.00018	0.000775853
CLDN14	1.05948	0.00077691
KIF17	-1.01692	0.00077691
USP53	-1.95487	0.000780237
PPAP2C	1.69935	0.000789625
DKFZp779M0652	-1.22513	0.000790247
RPL23AP32	-2.59318	0.000796619
ABTB1	-1.12514	0.000810599
MT1A	-1.72022	0.000814624
LYPD3	1.45137	0.000817602
ACVRL1	-3.80884	0.000820025
DPYSL4	1.88054	0.000822687
TNFRSF8	1.04635	0.000826743
KIAA0754	-1.29184	0.000829119
MGAM	-1.3481	0.000829119
FES	-1.14793	0.000830924
HAS2	2.13091	0.000831181
DPCR1	-1.35988	0.00083351
CCDC165	1.26838	0.000835717
LAG3	1.34414	0.000835717
GIMAP8	-3.52052	0.000835717
CDH13	-1.41642	0.000835717
C2orf55	-2.07341	0.000851213
KLF13	-1.91167	0.000851213
CDKL2	-2.29825	0.000855345
LOC100505633	1.10329	0.000856717
MEIS2	-1.00539	0.000856717
TNS4	3.17799	0.000856717
MYOC	-2.80101	0.000860688
GEM	2.129	0.000863602
RHOV	2.68499	0.000868543
CD1B	1.23385	0.000869336
RNF182	-1.46927	0.000870841
C10orf114	1.014	0.000877329
ITGA8	-2.39174	0.000881382
FOXA2	-1.50723	0.000883677
AK4	1.72869	0.000887967
CD36	-2.8067	0.000890463
CNIH3	1.37369	0.000896171
FOXF1	-3.38337	0.000898698
PPAT	1.55297	0.000906047
XAGE1A	3.10813	0.000908165
MTSS1	-1.32606	0.000910386
TNFRSF11B	2.46357	0.00091063
DIO3OS	-2.20369	0.000921723
PHLDA2	2.60444	0.000923334
SASH1	-2.42955	0.000924557
NUPR1	-1.66282	0.000928895
GKN2	-3.36268	0.000954752
SIX1	2.73295	0.000958053
MATN3	-1.21661	0.000961203
AHNAK	-1.35352	0.000977148
DOCK6	-1.17572	0.000984868
IL15RA	-1.63588	0.000985303
RAPH1	-1.19451	0.000994642
CDKN1C	-1.66464	0.000997193
LOC100505806	-1.00163	0.00100582
CLEC1B	-1.17513	0.00100948
CAMP	-2.59617	0.00101394
C15orf52	-1.81723	0.00102037
FAM89A	-1.61355	0.00102226
SV2B	1.2473	0.00102956
LOC728978	1.95977	0.00103429
OR2A9P	-1.13835	0.00103429
AEN	1.48792	0.0010354
LNX2	-1.13106	0.00104007
GPM6A	-2.73675	0.00104538
F2RL2	1.23784	0.00106121
APOBEC3F	1.04552	0.00106156
LOC100507387	-1.40836	0.00108075
IL17RA	-1.60832	0.00108249
COL24A1	1.06027	0.00108365
TTYH1	1.10405	0.00108365
TMEM220	-1.2395	0.00108851
CAT	-2.01868	0.00109192
ZG16B	2.39603	0.00109192
VTCN1	2.3595	0.00111046
TMEM140	-1.19621	0.00111358
RTKN2	-2.70331	0.00111532
ADAMTSL3	-2.25551	0.00111724
LMNB1	2.38649	0.0011244
TGFBR2	-1.78444	0.00113398
SPRR1A	1.12959	0.00113398
VCAM1	2.44299	0.00113653
HEY1	-1.58995	0.00113653
DUOX1	-2.84136	0.00114498
DUSP4	1.14587	0.00114675
GPX1	-1.24029	0.00114675
NFE2L3	1.18219	0.00114776
NRGN	-1.7409	0.00115145
PRSS3	1.2744	0.00115687
MYL12B	-1.01969	0.00116253
GABARAPL3	-1.01825	0.00116253
CHPT1	-1.09895	0.00116253
C2orf27A	1.3752	0.00117065
GDF10	-2.83502	0.00117163
DKK1	2.74117	0.00117381
TIE1	-1.5578	0.00117381
CCL23	-2.43445	0.00117381
VAT1L	1.78656	0.00118272
MOXD1	1.78723	0.00118459
COLEC11	1.6603	0.00118847
UAP1	1.71715	0.00118847
RALGAPA2	-1.31484	0.0011964
AASS	-1.15822	0.00119889
TCEAL2	-1.8489	0.00119992
SIGLEC5	-1.58484	0.00120959
WISP2	-2.6547	0.00121843
SIPA1	-1.0315	0.00121915
SLC35F3	1.21494	0.00122062
STK39	1.01782	0.00122326
PLEKHA4	1.01085	0.00123406
PLCE1	-1.60516	0.0012409
FKBP11	1.4482	0.00124385
TTLL3	2.31052	0.00124456
GABARAPL1	-1.10231	0.00125205
TXNIP	-2.32482	0.00125205
ITGA1	-1.40815	0.0012535
DBI	-1.00814	0.00125451
AKAP2	-1.15784	0.0012658
KIAA1274	-1.82073	0.0012719
CACNA1H	-1.24133	0.00129072
CTSG	2.67378	0.0012944
PRSS1	1.03843	0.00130294
HAGHL	1.00272	0.00130343
TMEM204	-4.95005	0.00130689
TCEAL3	-1.06623	0.00130689
NOSTRIN	-2.56639	0.00131883
HLX	-1.0309	0.001319
CHRDL2	2.26105	0.001332
BEGAIN	1.02687	0.001332
MYCT1	-1.69307	0.00133876
HSPA2	-1.43751	0.00134333
FAM19A5	1.00706	0.00134522
PMAIP1	1.7427	0.00134522
RAB11FIP1	-1.30804	0.00135182
UTRN	-1.17478	0.00135419
SLC4A7	1.1928	0.00135547
NCALD	-1.06378	0.00136647
SORBS2	-1.15392	0.00136853
HOXA5	-2.24773	0.00137438
SLC9A3R1	1.60013	0.00137746
THSD1	-1.9101	0.00138268
FBLN2	1.26506	0.00139158
TCF21	-2.56062	0.0013937
LDB2	-1.83932	0.00142363
APCDD1	-1.94802	0.00143242
GPRIN2	-3.21114	0.00143642
FAM82A1	-1.50122	0.0014405
FOXC1	1.52051	0.00144066
METTL8	1.00686	0.00144168
PUS1	1.03685	0.00144367
MT1E	-2.1144	0.00145661
PID1	-1.8816	0.00146717
TBXAS1	-1.02466	0.00147299
MYO5C	-1.14197	0.00148547
C5orf13	1.28411	0.00148557
ASPHD1	1.69546	0.00148827
MAPK6	1.07445	0.00148827
FGFBP2	-1.51469	0.00148827
C15orf48	2.44115	0.00149019
MT1H	-1.77127	0.00150064
RGL3	-1.4545	0.00150299
SLC9A3R2	-2.77841	0.00151119
IER3	1.89651	0.00152843
GPIHBP1	-3.97418	0.00152843
TMEM70	1.15799	0.00153187
ESAM	-2.53552	0.00153842
ITK	1.26085	0.00156376
ABCA3	-3.15155	0.00159466
SULF1	2.40571	0.0016067
44078	-1.23216	0.00164555
MIR17HG	1.63684	0.00165108
TNS1	-1.44545	0.00165168
DNAJC12	2.22214	0.00165347
TMEM37	-1.26781	0.00165948
PLXNA2	-1.7178	0.00166751
SESN1	-1.22692	0.00167049
PCSK1	2.06853	0.00169663
TCEAL6	-1.00596	0.00171409
IL11	2.09582	0.00173138
HSPA12B	-3.70563	0.00173671
LOC100287628	1.15967	0.00174699
CTIF	-1.25556	0.00176065
C1orf198	-1.67482	0.00176926
PKNOX2	-1.45415	0.00178229
SEMA3A	1.03006	0.0017871
ZNF643	1.07581	0.00180218
RPAP3	1.18417	0.0018032
LOC100507460	2.47176	0.00180929
PARVA	-1.0212	0.00182068
C4B	1.47452	0.00184971
FAP	2.09467	0.00185431
LPL	-2.96724	0.00187072
ACR	-1.20744	0.00189294
LOC100287177	1.068	0.00190621
KIF2A	1.60873	0.00191357
IL4I1	2.53827	0.00193898
LOC100652944	-2.07746	0.00194138
GIMAP1	-3.11333	0.00194837
LOC255480	-1.40285	0.0019664
SERPINB3	3.18838	0.00197848
MFI2-AS1	1.033	0.00198421
OR7E47P	-1.69441	0.00198421
NUP210	1.16922	0.00198982
NEXN	-2.45921	0.00199649
SLC2A1	1.55555	0.00200636
GJA5	-1.15322	0.00205177
GPC2	1.15932	0.00207907
CLIC3	-1.92897	0.00209072
FGD5	-1.6237	0.00209873
APOL3	-1.8534	0.00210962
SCG2	1.37453	0.00211161
MTTP	1.79215	0.00214596
SPDEF	1.43506	0.0021466
CDCA7	2.83938	0.00214696
TACC3	1.29446	0.00216967
AMOTL2	-1.3821	0.00217176
BMPR2	-1.88908	0.00220666
LGALS7	2.59603	0.00221532
CYP24A1	1.78495	0.00221773
SLC45A3	1.16359	0.00222275
LOC730101	1.03803	0.00224528
MYBPH	1.93813	0.00224528
ITGB7	1.48536	0.00224821
IL8	1.8377	0.00226126
MBIP	-1.38271	0.00226126
C11orf52	-1.3491	0.002263
TLR4	-2.01116	0.00229418
PNOC	2.0186	0.0023217
DIO3	-2.27157	0.00233585
WEE1	1.35684	0.00235393
FXYD6	-1.62136	0.00236424
UGT1A6	1.5729	0.00236424
LGALS7B	2.07305	0.00238209
SALL4	2.14337	0.0024039
CGNL1	-2.05192	0.0024104
NGEF	2.4471	0.00245389
KCNK17	-2.29049	0.00245389
HOXA6	-1.23749	0.00245389
MGLL	-1.55066	0.00246267
FBXO16	1.24134	0.00246306
SNORD22	1.01723	0.00246693
FUT3	-1.12983	0.00248181
COL1A1	1.98838	0.00249524
DUOXA1	-4.02346	0.00250422
KRT86	1.24655	0.00252248
RPL13P5	-1.42675	0.00253813
NOLC1	1.37434	0.00253926
SFRP1	2.39851	0.00255072
EVPLL	-1.30429	0.00255072
SNHG1	1.26747	0.00255084
BASP1	1.32213	0.00256339
KLK8	1.56758	0.00257726
SLC31A2	-2.0886	0.0025843
SLC22A15	-1.5123	0.00259489
HAMP	1.37364	0.0026017
LOC100292909	1.61498	0.00260296
KRT7	-1.75281	0.00261174
FGD4	-1.21143	0.00262284
TDO2	2.19237	0.00262284
RELN	1.03286	0.00262284
C5orf32	-1.01323	0.00262284
FIGF	-4.09211	0.00263365
ALDH1A3	1.46761	0.00266811
FAM150B	-2.82811	0.0026727
TMEM106C	-1.15801	0.00267478
SOAT2	1.45008	0.00269396
SLC16A1	1.8862	0.00270497
LINC00473	2.32184	0.00270785
CREM	1.10959	0.00271228
MAGED4B	2.34534	0.00271228
GDF11	1.01942	0.00273398
METTL1	1.02364	0.00273514
TJP1	-1.27262	0.00274196
CD59	-1.41198	0.0027471
FLVCR1	1.10058	0.00275163
COX4I2	-2.18007	0.00277631
KHDRBS2	-1.99075	0.00280708
ACAN	1.37722	0.00283015
FBLN5	-2.02812	0.00283279
FAM189A2	-1.26548	0.002834
SPATA13	-1.10546	0.00284105
DHRS12	-1.41981	0.00286178
PPAP2A	-1.04517	0.00287012
EFNA1	-1.39888	0.00287287
HMGB3	1.71067	0.00287555
HMGB3P1	1.82823	0.00288584
MAMDC2	-2.56905	0.00288659
C1orf187	1.0107	0.00290993
BYSL	1.57104	0.0029119
ADCYAP1	1.13226	0.00291697
SHROOM4	-1.455	0.00293805
LOC100506699	-2.28786	0.00297826
GPR4	-2.45157	0.0029843
KLHDC7B	1.23681	0.00303031
SPON2	-1.67467	0.00303429
C8orf60	-1.38692	0.00303637
GNL3	1.33685	0.00304207
TMEM79	1.10505	0.00304242
ADH1A	-2.73749	0.00305833
ALS2CL	-1.26347	0.00305833
LOC100506462	-1.03645	0.00306157
LGI4	-2.05755	0.00308294
FOSL1	1.21886	0.00310724
KLF4	-1.81813	0.00311962
IL17RE	-1.33072	0.00313176
TTYH3	1.14878	0.00314509
EGLN3	1.71499	0.00314689
CYTL1	1.60598	0.00314689
CA3	-3.38822	0.00315249
HILPDA	1.70497	0.00316075
CYP4Z1	-1.89055	0.00317384
MLLT11	2.09434	0.00319006
ITSN2	-1.13072	0.00319922
CCL11	1.61945	0.00322399
LAMA2	-2.98773	0.00323829
PKIB	1.92272	0.00324745
KNTC1	1.72906	0.00325169
GSTM5	-1.42024	0.0032996
SPOCK2	-1.89521	0.00331722
ADA	2.02308	0.00334936
TLR5	-1.32044	0.00335625
KLF9	-2.58683	0.00336713
RILPL2	-1.66396	0.00336767
MMP13	1.11811	0.00336815
FANCG	1.37565	0.00340889
SERPINB2	2.23192	0.00341115
MST1P9	-1.08217	0.00341241
VLDLR	1.11853	0.0034402
STX12	-1.68107	0.00345122
LIMS2	-2.35248	0.00345593
CCDC80	1.53451	0.00345593
DPYSL2	-1.08223	0.00345593
SAA4	2.26558	0.00347702
DACH1	-2.10347	0.00350254
GNG4	1.38789	0.00352014
ITPKA	1.77314	0.0035541
DQX1	1.03198	0.00356106
CCDC107	-1.12993	0.00356997
GAMT	1.31483	0.00357817
CYB5A	-2.17967	0.00358925
HPRT1	1.21995	0.00361537
S1PR1	-3.49478	0.00362773
NCOA1	-1.01056	0.00362897
SERPINE2	1.69395	0.00363456
NT5E	1.4213	0.00363456
LIPC	1.19435	0.00364342
MIA	2.14168	0.00364342
NEU4	1.05405	0.00365342
CCRL1	-1.58629	0.00365453
PIR	-1.42631	0.00369768
MT1G	-1.47033	0.00370998
KYNU	1.66583	0.00370998
DOCK4	-1.41663	0.00372215
CCDC68	-1.06769	0.00372758
PIF1	1.03503	0.00373071
SOX11	1.27184	0.00374419
ALX1	1.13702	0.00376465
PAMR1	1.41118	0.00377738
NIM1	-1.07213	0.00377874
SLC11A1	-1.78071	0.00378305
EGFL7	-1.63773	0.00379538
GDA	1.65387	0.0038062
GRASP	-3.745	0.0038062
TBX2	-2.14114	0.00381863
CHIT1	2.36627	0.00382437
RAI2	-3.03232	0.00384842
SLIT2	-3.57562	0.00384842
SPRR1B	1.01865	0.00385061
CD163	-4.81214	0.00385061
NELL2	1.63288	0.00385102
SERPINB4	2.80747	0.00386774
SPRY4	-1.03201	0.00388505
TMEM2	-1.72271	0.00389666
ANKRD20A2	-1.1419	0.00393672
FPR2	-2.05679	0.00393798
LRRK2	-3.44273	0.00395526
PRPS1	1.22221	0.00395688
ABCA6	-2.65965	0.00396053
CYP2B7P1	-1.70757	0.00396053
BMP4	1.48131	0.00396053
OGDHL	2.33398	0.00396352
GDF3	1.97373	0.00404225
ADAMTSL2	-1.69124	0.00404804
B3GNT8	-2.46115	0.00407685
CMKLR1	-1.7304	0.00411265
RPGR	-1.85353	0.00411465
IGFL2	1.36422	0.00412686
HRSP12	-1.02715	0.00419307
PRRT2	1.04264	0.00427325
IL18	-1.01056	0.00428077
KIAA1462	-1.47564	0.00428805
C6orf141	1.31417	0.00429616
P4HA3	1.40487	0.00431152
PROM1	2.11134	0.00432495
MT1X	-1.20214	0.00433129
GJB1	1.09037	0.00435683
HOPX	-4.12768	0.00435809
KCNE3	-1.99917	0.0043601
C1QC	-1.99938	0.00439177
CYYR1	-1.72327	0.00442097
FSCN1	1.03073	0.00443433
HIF1A	1.46806	0.00446988
CCNE1	1.62881	0.0044743
C9orf125	-1.06549	0.00448421
MBL1P	-1.59927	0.00448421
HSPA4L	1.3792	0.0045044
SERINC1	-1.21126	0.00450711
LOC100129406	-1.5718	0.00454413
KCNJ8	-2.04279	0.0045536
UPK3B	-1.26952	0.00456249
SPINK1	2.26021	0.00457787
TPK1	-1.09489	0.00458907
CENPP	1.36329	0.00458907
TSPAN12	-2.26044	0.00459631
DAPL1	1.51523	0.00460587
MGAT3	-1.02358	0.00460587
LMO2	-1.27375	0.004626
FIGNL1	1.01736	0.0046798
RPF2	1.07586	0.00473207
E2F5	1.0504	0.00476206
NTRK3	-1.43235	0.00476336
ISYNA1	1.20158	0.00477396
ABCG1	-1.22811	0.00477528
SYT17	-1.33504	0.00479768
TFAP2B	1.1367	0.00481279
ZNF438	-1.35166	0.00482618
E2F3	1.01318	0.00483545
KLHL2	-1.22673	0.00484229
EYA2	1.48131	0.00489274
AZGP1	-1.36749	0.00489874
C1orf116	-3.03814	0.00490796
HRASLS	1.25021	0.00490877
MAGEC2	1.50946	0.00493334
SLC27A2	2.21591	0.00493615
ENPP4	-1.75019	0.00498898
SAMD5	-1.41604	0.00502775
MGC16025	1.46105	0.00504066
NPNT	-3.07369	0.00504494
FMO2	-3.65682	0.0050666
LOXL2	2.19882	0.0050666
DENND3	-1.13793	0.0050666
WDR43	1.02028	0.0050938
FAM57A	1.0114	0.00512248
LRRC36	-2.38658	0.00514532
TRIML2	1.31474	0.00514532
TMEM125	-3.72519	0.00515867
PLEKHH2	-1.29301	0.00515867
GADD45G	-1.3729	0.00515867
RAPGEF3	-1.0801	0.00516574
ABCA12	1.34079	0.0051777
FAM83A	1.07011	0.00522483
LMO7	-2.13963	0.00522486
GIMAP6	-2.98118	0.00525165
LOC100507632	-1.09206	0.00530876
ALAS2	1.30711	0.00531799
GJA4	-3.16597	0.00533052
BCAS1	1.40085	0.00533757
PRSS8	-1.15211	0.00534138
DYSF	-1.29517	0.00535143
GREM1	1.33672	0.00535143
TUBB2A	1.25213	0.00539108
CXCL12	1.19271	0.00544245
KREMEN2	1.9888	0.00545431
SLC1A2	1.04186	0.00547124
CLIC5	-3.10017	0.0055434
EXPH5	-1.59181	0.00557863
TFAP2C	1.18317	0.00558731
COL4A3	-1.26576	0.00559628
ANKRD18B	1.13924	0.00559628
FGFR1OP	1.10553	0.0056232
UCHL1	1.89922	0.00563008
MFAP5	-1.44915	0.00564833
PAGE5	1.24575	0.0056703
TBX5	-1.53407	0.00569144
ADORA2B	1.25642	0.00572449
RPP40	1.35758	0.00572785
PHACTR2	-1.25828	0.00572799
PCP4L1	-1.25415	0.00573062
ASB2	1.742	0.00575577
ICAM2	-2.08279	0.00578066
LOC100509100	-1.44794	0.00578176
TDRD9	-1.12349	0.00581409
KANK3	-1.54158	0.00588844
S100A6	-1.70465	0.00588976
FANCA	1.50703	0.00589877
SERPINA6	1.4969	0.00593478
FABP5	-1.10009	0.00593982
GPRC5A	-1.35927	0.00601119
PRDX4	1.39338	0.00601473
SLAMF7	2.65085	0.00603002
GPT2	1.75151	0.00603817
TM6SF1	-1.02476	0.00604783
TBX4	-1.65833	0.00605616
TRIM2	1.03313	0.00607755
ADH1C	-3.35672	0.00607755
TSTD1	-1.14458	0.00610241
SHC3	-1.24201	0.00610297
STON1	-1.4974	0.00611076
GSC	1.05356	0.00611417
CAPN2	-1.1341	0.00618416
MUC15	-1.08755	0.00619472
PRR15	1.0574	0.00619472
SERP2	-1.15851	0.00619565
ADRB2	-2.28782	0.00620961
CRYAB	-2.3821	0.00624665
MACROD2	-1.44231	0.00627483
BIK	1.0623	0.00633752
KRT16	1.46534	0.00636316
PTPRH	1.78672	0.00637639
ARNTL	-1.49157	0.00643426
LAMB2	-1.24437	0.00646168
CYP4B1	-4.23579	0.00646418
CGREF1	1.66515	0.00648797
SGMS1	-1.127	0.00652349
MUC16	1.15832	0.00652964
RPL22L1	1.27795	0.00658009
FGR	-2.14234	0.00658009
RP11-165H20.1	-2.41973	0.0066018
C5orf41	-1.92347	0.0066812
AOC3	-3.95069	0.00668614
IL18RAP	-3.35984	0.00669249
DUSP5	2.01718	0.00670619
SLC26A9	-2.60306	0.00671366
DUSP14	1.02009	0.00671874
LOC100652987	-1.00208	0.00671958
ROBO4	-2.81005	0.00674707
ZNF524	-1.186	0.00675966
C12orf24	1.46505	0.00676692
MAGEA6	1.63793	0.00682575
PLA2G10	-2.34165	0.0068583
UGT2B15	1.13783	0.00689001
TNFSF13	-1.6975	0.00691304
BCHE	1.41062	0.00693164
GPX8	1.5358	0.00693164
C20orf46	-1.23048	0.00694477
TTR	3.2728	0.0069875
COL4A4	-1.76567	0.0069875
CXCR1	-1.02087	0.0069934
SQRDL	-1.5237	0.00713059
DLC1	-1.26115	0.00715158
BZW2	1.08757	0.00722408
UGCG	1.29788	0.0072295
MMP25	-2.28011	0.00723132
SCEL	-3.55314	0.00723314
CD82	-1.48633	0.00727043
PLEKHA1	-1.37894	0.00736268
DNM3	-1.41664	0.00740472
ITM2B	-1.46757	0.00743218
KCNE4	1.36251	0.00752185
VSNL1	1.20619	0.00755866
ST6GALNAC1	1.57217	0.00755866
TRIM63	1.06351	0.0075656
CCL20	1.81248	0.00757405
DOK2	-1.51509	0.0076409
HOXC9	2.05677	0.00783119
LY6D	1.43227	0.00790674
ZNF331	-1.73138	0.00792047
HIGD1B	-3.44185	0.00792048
MYL4	1.03935	0.00792102
NMUR1	-1.58137	0.00792585
JMJD7	-1.1241	0.00797849
SLC7A7	-2.83438	0.00799074
SOX2	2.72023	0.00804034
GPR20	-1.62969	0.00810714
IFITM2	-1.35206	0.00812541
LOC100505971	-1.38404	0.0081321
HSD11B1	-1.87823	0.00815535
CLGN	2.18358	0.0081978
AGRP	-1.89829	0.00820532
SERPING1	-1.90267	0.00820729
SCRG1	1.72187	0.00820729
LAMP3	-4.70251	0.00823424
AHRR	1.23191	0.00827416
PRPS1L1	1.19256	0.00829082
TSPAN18	-1.16588	0.00831681
RGS20	1.47344	0.0083781
LHX2	2.07319	0.00838562
DONSON	1.50603	0.00839577
SORD	1.34411	0.00843059
PROC	1.5934	0.00843535
PTRF	-1.40427	0.00844426
ARHGAP18	-1.04383	0.00844766
LOC100170939	-1.11028	0.00846172
GAL	2.69529	0.00847339
MUCL1	1.57779	0.00848292
FBXL3	-1.00746	0.0085123
SFN	1.09488	0.00855936
CALCRL	-1.90885	0.0085818
CLEC14A	-2.91163	0.0086103
CBFA2T3	-1.09388	0.00864996
TMEM163	-1.3926	0.00867137
PMEL	2.0563	0.00867946
ALDH2	-2.43916	0.00870462
TMEM132A	1.02379	0.00871855
AGER	-2.43381	0.00875114
STAR	2.23895	0.00875755
FOXL2	1.11639	0.00876722
FRY	-3.14041	0.00877793
LEPR	-1.01229	0.0089158
NCAPH	2.06694	0.00894053
ZNF503	-1.11751	0.00895672
ATP2C2	-1.67602	0.00895672
SH2D2A	1.0306	0.00895765
VCX2	1.04973	0.00895972
EME1	1.19249	0.00904229
POSTN	1.42186	0.00906148
HOXB5	-1.2698	0.0090958
MT1L	-1.62652	0.00909649
CCDC86	1.26037	0.00909842
HIPK2	-1.11275	0.00909842
LEPROT	-1.29233	0.00912246
TNFSF10	-2.27851	0.00921966
LOC541471	1.54149	0.00930799
GGCT	1.03046	0.00932939
MMP12	1.51523	0.00934514
GRK5	-2.25562	0.00955276
RUNX1T1	-1.36217	0.00969458
SLPI	-3.03882	0.00971727
GIMAP5	-2.77626	0.00971727
DKC1	1.05219	0.00974418
MCM6	1.76081	0.00980515
DNER	1.48484	0.00980515
C19orf59	-3.29097	0.00983542
VCX	1.57483	0.00985949
TNAP	-1.5202	0.00986612
NAT8L	1.53016	0.00989639
KIAA0355	-1.03138	0.00990079
SLC7A3	1.08194	0.00991567
CHI3L2	-1.62164	0.010037
CDK6	1.04176	0.0100932
ADH4	1.33354	0.0102096
C11orf41	1.19202	0.0102757
CD300LF	-1.1756	0.0103519
EGR3	2.11614	0.0104096
MACF1	-1.6037	0.010413
VCX3A	1.63059	0.0104251
JDP2	-1.72514	0.0104687
NIP7	1.13201	0.0104866
GCA	-1.40702	0.0104899
VGLL3	-1.11318	0.0104932
CD81	-1.0388	0.0104932
LIG1	1.17452	0.010508
SERPINH1	1.00412	0.0105344
CLDN5	-3.36445	0.0105486
H2AFX	1.21075	0.0105591
C10orf54	-1.62637	0.0105601
CXCL6	1.46126	0.010561
RSPO2	-1.04806	0.0105632
IGFBP6	-1.4367	0.0105781
SHANK3	-2.79778	0.0106681
SCARF1	-1.12002	0.0106712
PPP1R14B	1.0082	0.0107035
RGS9	-1.62441	0.0107367
AMPD1	1.56639	0.0107986
DHRS3	-1.04085	0.0108537
UHRF1	1.7284	0.0108537
LOC100507312	1.41252	0.0108693
CTSH	-2.59768	0.0108948
CCDC84	-1.13621	0.0109143
LOC100128420	1.16695	0.0109538
COX17	-1.09924	0.0109563
KRT23	2.34081	0.0111297
SLC39A6	1.91756	0.0111661
MTHFD2	1.63378	0.011236
PSAT1	2.3974	0.0112738
CPAMD8	-2.65947	0.0114746
PTGS2	1.26095	0.0115416
CCRL2	-1.20995	0.0115618
ABCA8	-1.4922	0.0115618
PDIA4	1.14428	0.0116109
KCNS3	-1.68502	0.0116475
S100A8	-4.36263	0.0116574
LOC100506305	1.49044	0.0116574
RAB3B	1.39202	0.0116734
RSPO1	-1.13914	0.0117179
NLRC4	-2.34095	0.0117528
RMI2	2.42922	0.011788
C8orf85	-1.10868	0.011788
RUNX3	1.06866	0.011819
IFIT3	-1.06051	0.0118201
AGT	1.9976	0.0118552
HELLS	1.34901	0.011883
GNPNAT1	1.08209	0.0119079
P2RY14	-2.5098	0.0119464
SFTA1P	-2.65378	0.0120017
RGS18	-2.27528	0.0120017
KLRK1	1.1305	0.0120646
ZNF683	1.65532	0.0120908
PF4	-1.84266	0.0121203
SYNE1	-1.18332	0.0121203
ARHGAP44	-1.46955	0.0121203
EYA1	1.30776	0.0121203
OSBPL5	-1.02753	0.0122936
SRPX2	-1.03232	0.0123787
FABP7	1.42415	0.0124407
GLT1D1	-1.21934	0.0124407
ADAMTS8	-1.34891	0.012441
C19orf77	1.13578	0.0125404
SLC40A1	-2.11403	0.0125799
E2F8	1.46624	0.0125799
CHTF18	1.16249	0.0125971
PRKCZ	-1.22708	0.0126113
MS4A14	-1.84607	0.0127001
TNFAIP8L2	-1.4711	0.0127278
PAQR9	1.25222	0.0127453
IGDCC3	1.29116	0.0128907
LOC100505880	1.08937	0.0129632
OSTalpha	1.40588	0.0130148
NRAS	1.06564	0.0130165
HCLS1	-1.7441	0.013137
LRRC38	1.68173	0.0131695
HN1L	1.21843	0.0132963
MRC1	-3.02144	0.0133187
CA9	1.78091	0.0133187
LINC00152	1.16288	0.0133442
COL9A3	2.48453	0.0133714
PVALB	1.31658	0.0133728
IRX5	-1.576	0.0134414
KRT8	1.17912	0.0134595
IL7R	-2.26395	0.0134773
N4BP2L1	-1.16678	0.0134949
VAMP8	-1.4753	0.0135056
TUBB8	1.24665	0.0135193
GBP4	-2.3646	0.0135193
PTTG3P	1.55961	0.0135328
C16orf73	1.74717	0.0136126
KLRC4	1.44762	0.0136731
MAP3K3	-1.04526	0.0136853
SALL1	1.20595	0.0137327
KLF8	-1.18694	0.0137814
KRT16P2	1.94618	0.013976
CD14	-1.7392	0.013998
RIPK3	-1.1941	0.0140263
HEYL	-3.01575	0.0140403
LIN28A	1.27848	0.0141196
AGPAT5	1.13259	0.0141999
GATA1	1.09252	0.0142274
AQP4	-1.62336	0.0142515
AGMAT	1.46159	0.0143366
CTSL2	2.13969	0.0143366
PPIL1	1.20078	0.0143992
OTUD1	-1.25465	0.0144127
MAGEB2	1.02905	0.0144848
HOXB13	1.1811	0.0145438
LHFP	-2.25922	0.0145438
FAM65B	-1.38073	0.0145438
TMEM177	1.12019	0.0146015
CADM1	-1.27545	0.014613
CTAG1A	1.75709	0.0146131
CENPV	1.36387	0.0146338
CHI3L1	1.12993	0.0147367
ODC1	1.12083	0.0147419
CELSR3	1.09997	0.0147483
LYST	-1.37142	0.0147852
CHRNA5	1.15365	0.01482
SIDT2	-1.11058	0.0148481
CLDN10	1.13666	0.0148484
EZH2	2.17949	0.0148655
KRT16P3	1.30109	0.0148655
ADRA2A	1.08961	0.0148655
ABLIM1	-1.14088	0.0148937
IGSF1	1.35313	0.0149533
CCDC48	-2.72663	0.0149664
SLC6A10P	1.50166	0.0150831
SLC13A3	1.09724	0.0150831
LRRC25	-1.71382	0.0151038
UTS2	2.27698	0.0151924
C17orf81	1.31493	0.0151924
SPANXB2	1.75249	0.0152491
LOC100134091	-1.05449	0.0153185
CYP26A1	1.36875	0.0153926
GMDS	1.28722	0.0154173
PITX2	1.14091	0.0154247
BLK	1.79014	0.0154283
JAKMIP1	1.49538	0.0155045
ADCY4	-2.94575	0.0155398
C19orf33	-1.43304	0.0155443
NDC80	1.85647	0.0156047
MAL2	-1.01978	0.0156282
C7	-2.19827	0.0156794
IL11RA	-1.20277	0.0157487
DCUN1D5	1.15073	0.0157714
TM4SF5	1.54346	0.0157921
PTPN13	-1.20162	0.0158147
TDRD10	-1.1135	0.0158655
PLAUR	1.13879	0.0158753
LOC283454	1.35249	0.0158754
TLCD2	-1.62621	0.0159196
LINC00221	1.16441	0.0159645
DSCAM	1.28643	0.0160256
SFTPA1	-2.97549	0.0161661
MYBL2	1.10622	0.0163647
HMGA2	1.79603	0.01639
CR1L	1.36138	0.0163903
HSPB2	-2.90085	0.0163903
CLEC4D	-1.41371	0.0164223
TSPAN6	1.2131	0.0164435
C1orf162	-2.59991	0.0165934
EMCN	-3.53581	0.0166247
IL6R	-2.00053	0.0166802
CSAG2	1.67782	0.0166866
UNC5B	-1.38742	0.0166866
SAMSN1	1.16534	0.0167045
NUAK1	-1.5676	0.0169028
BIRC3	1.38954	0.0169031
TLR8	-1.20349	0.0169135
KAL1	-1.92956	0.0169851
TEX19	1.81503	0.0170714
AFAP1-AS1	1.19982	0.0170816
SELPLG	-1.21408	0.0171378
TNFAIP1	-1.05305	0.0171382
HBG1	1.66928	0.0171695
RASD1	-1.58688	0.01717
LOC100652730	1.53552	0.017171
TBC1D2	-1.15889	0.0171905
GPR34	-1.20822	0.0172348
MMP7	3.51516	0.0172986
PLA2G4A	1.23498	0.0173325
CENPW	1.58826	0.0173325
SEPP1	-1.59934	0.0173649
C19orf80	1.19432	0.0174389
PAG1	-1.70521	0.0174494
RABAC1	-1.11168	0.0175816
IGKV1D-8	1.34602	0.0176298
LYPD5	-2.11437	0.0176366
TREM1	-2.0101	0.017806
CDH18	1.34567	0.0178077
ANO2	-1.07342	0.0178328
MEIS1	-1.44487	0.0178328
GRN	-1.31731	0.0178503
GLDC	1.65522	0.0179255
MT1B	-1.43174	0.0179385
PIK3IP1	-1.23018	0.0179465
GFRA1	1.48572	0.0179465
C1orf213	1.00057	0.0180296
CDC42EP2	-1.40323	0.0180381
GJC2	-1.25606	0.0181562
FANCD2	1.03704	0.0181812
CDC7	1.49288	0.0181936
RHCE	1.67459	0.0182476
FTCD	1.47892	0.0182602
FJX1	1.29831	0.0183575
TPD52L1	1.14926	0.0183826
DRAM1	-1.3708	0.0183967
HPR	1.80502	0.0184063
RRP12	1.01254	0.0184351
MAGEA10	1.34971	0.0184919
LOC645249	1.68565	0.0184919
CCNB2	1.38851	0.0184919
DENR	1.077	0.0185256
C18orf56	1.74596	0.0185492
HPDL	1.43056	0.0185492
SEMA3G	-1.60715	0.0185498
DUSP9	1.09779	0.0186762
TACC1	-1.42681	0.0187076
ARHGAP24	-1.09262	0.0187316
HMBOX1	-1.65823	0.0188715
ZIC3	1.4817	0.0189693
FOLR1	-1.09614	0.0189848
SLCO2B1	-2.38825	0.0191197
FOXO1	-1.65079	0.0191286
ONECUT2	1.2777	0.019189
TIGIT	1.45787	0.019337
E2F7	2.30732	0.019337
LOC100507203	1.64314	0.0194431
NTS	3.10027	0.0195047
PTTG1	1.91301	0.0195259
CSAG1	1.669	0.0195599
TACSTD2	-1.20036	0.0197091
C2orf54	-1.2609	0.0197381
CEBPD	-2.89526	0.0197848
BORA	1.30823	0.0198121
TERT	1.28631	0.0198664
IGLV6-57	1.16751	0.0199083
DPEP2	-1.5186	0.0199252
SNX5	1.07534	0.0199313
APOBR	-1.72941	0.0200816
TNNT1	1.55054	0.0201717
PAK1	1.02607	0.0202313
VRK1	1.17775	0.0202542
CXorf61	1.35806	0.0203254
HLA-E	-1.32975	0.020328
WNT2	-1.13558	0.0203623
CCNO	1.0782	0.0203755
DTL	2.28056	0.0203871
KCTD12	-1.54756	0.0204461
DKFZP547L112	1.20853	0.0205075
ALOX5AP	-2.73457	0.0205075
DPPA4	1.72798	0.0206028
IL3RA	-1.67218	0.0207463
C9orf40	1.11527	0.0207678
HOXA11-AS1	1.59047	0.0208301
FLJ43663	-1.23391	0.0208628
MND1	2.35343	0.0209042
CCR7	3.04905	0.0209195
MS4A7	-2.52742	0.0209195
PASD1	1.65199	0.0209374
ABCC2	1.66187	0.0209775
TDGF1	1.1649	0.0209794
ZWILCH	1.26049	0.0210221
ETV4	1.31144	0.0211798
BLM	1.42347	0.0212064
C3AR1	-1.05111	0.0212102
MSMB	2.75763	0.0212782
VIL1	1.50975	0.0214276
PON3	-2.06693	0.0214653
CDC25A	1.29532	0.0214669
LPPR4	1.57158	0.0215378
MMP10	1.48339	0.0215767
NPTX2	1.19348	0.0216269
DUSP13	1.08555	0.0216667
PSCA	1.44316	0.0216747
C9orf140	1.98724	0.0216862
LOC100271840	1.36213	0.0217432
SMARCD3	-1.12354	0.0218407
C7orf40	1.00717	0.0218503
SIX6	1.27171	0.0218886
SUSD2	-2.74666	0.0219173
FBXO5	1.4218	0.021927
MAGEC1	1.64613	0.0219286
LEFTY2	1.17878	0.0220054
SFTA3	-3.90975	0.0220857
LOC645321	1.07614	0.0221192
KRT5	1.93792	0.0222051
FLI1	-1.38493	0.0222486
TMEM47	-1.13036	0.0222671
AKR1B10	1.69377	0.0222671
APOLD1	-2.71786	0.0223304
EDN2	1.58149	0.0223418
PYCR1	1.41044	0.0223465
DLK1	2.02433	0.022393
PCSK9	-1.60217	0.0225781
LRRC32	-2.91342	0.0225781
CCL19	3.24558	0.022596
ABLIM2	-1.36534	0.0226448
F13A1	-2.01514	0.0227496
SLC39A13	-1.0132	0.0227496
HOXB9	1.95831	0.0228265
S100A2	3.15071	0.0228289
RFWD3	1.09281	0.022831
HK3	-1.23513	0.0230131
TMPRSS2	-1.90598	0.0230555
MS4A6A	-1.49644	0.0230982
MANEAL	1.36443	0.0231019
LOC100130811	1.82961	0.0231063
YDJC	1.02907	0.0231083
TF	1.30538	0.0231245
CSRNP1	-1.55831	0.0231388
HJURP	1.25272	0.0231388
LOC728724	1.02863	0.0232197
TET1	1.27309	0.0232989
UBE2S	1.26886	0.0232991
EEF1A2	1.99668	0.0233453
SFTA2	-2.46233	0.0233602
PLP1	1.55446	0.0233634
NOP16	1.11062	0.0234142
KLF2	-2.0001	0.0234142
TRIP13	1.15599	0.0234161
ORC1	1.4959	0.0234338
PLK1	1.2304	0.0234861
AURKB	1.34935	0.0235159
GUCY1B3	-1.1487	0.0235916
KIF20B	1.14571	0.0235916
KIF2C	2.0552	0.0236719
SPTA1	1.63914	0.0237093
LATS2	-1.08143	0.0237268
RHBG	1.24014	0.0237516
PKD2L1	-1.23862	0.0238156
RHAG	1.80808	0.0238715
NKAIN1	1.88403	0.0239997
ATG16L2	-1.03401	0.0240075
OVOL2	-1.06586	0.0240247
FGB	1.95312	0.0241096
PITX1	1.20897	0.0242762
LMNB2	1.17458	0.024429
C13orf27	1.13113	0.0244341
APOO	1.00444	0.0245192
CHEK1	2.44985	0.0245971
TP63	1.20738	0.0246734
TYMS	3.15193	0.0247366
CENPF	2.25094	0.024756
PAICS	1.86751	0.0247854
RBMS3	-1.33245	0.0249159
SERPINE1	1.33278	0.0249465
ZMAT4	1.12236	0.0249502
CENPK	1.60714	0.0249521
MAT1A	1.49311	0.0249521
FILIP1	-1.60114	0.0249521
PTPLAD2	-1.26868	0.0250411
SKAP1	1.13752	0.0250782
CXCL1	2.08866	0.0252407
IGF2BP3	2.17136	0.0252626
PAFAH1B3	1.24436	0.0254205
WFDC1	-1.27463	0.0255496
NR3C2	-1.36767	0.0257029
SERPINA7	1.76679	0.025713
FCER1G	-1.29168	0.0257157
C1orf135	1.86197	0.025761
NUSAP1	1.43112	0.0258576
SLC13A5	1.41441	0.0258854
NPFF	-1.14203	0.0258854
STAB1	-1.09375	0.0259647
CYP1B1	1.28804	0.0259706
TSPAN15	-1.24196	0.0260836
C12orf32	1.13543	0.0260863
IGF2BP1	1.61451	0.0261424
ZP1	1.10635	0.0262315
HOXA4	-1.08645	0.0263037
HBZ	1.48284	0.0263201
FCGR3B	-1.37177	0.0263219
ITIH2	1.86206	0.0263659
C17orf58	1.08627	0.0263926
ZYG11A	1.16523	0.0267036
GAGE3	1.0924	0.0267653
LOC389831	1.45701	0.0269608
KDELR3	1.18805	0.0269912
F3	-1.22091	0.0269912
SERPINC1	1.62545	0.0269912
ABI3	-1.29358	0.027081
PALLD	-1.83505	0.0270829
DSCAM-AS1	1.36824	0.0271336
SPARCL1	-4.99334	0.0274938
KIF4A	1.61991	0.0275729
FPR1	-2.72374	0.0275804
C9orf95	-1.0983	0.0276269
LMO3	-2.19917	0.0278625
F2	1.63204	0.0278625
GART	1.02838	0.0278673
ELN	-1.12469	0.0279223
VSIG4	-2.59886	0.0280302
RHOXF2B	3.14734	0.0280726
PDIA2	1.2325	0.0281161
NUP62CL	1.14682	0.0281226
MEOX2	-1.0757	0.0281226
GATA3	1.3681	0.0284625
FAM26F	1.15456	0.0285402
LOC643401	1.01918	0.028578
MAGEA2B	2.36406	0.0286095
TANC1	-1.04209	0.0286586
CCL2	2.54739	0.028672
NUP155	1.26919	0.0286931
NKX2-1	-1.54656	0.0287583
PION	-1.77071	0.0288391
ROS1	-1.26988	0.0288764
PPFIA4	1.34001	0.0289676
LOC100506687	-1.54269	0.0289737
LOC100507043	1.33418	0.029
CYP2F1	1.20262	0.029
NCAPG	2.81221	0.0292109
ACTL8	1.16652	0.029281
HCK	-1.53302	0.0293471
CXCR3	1.36022	0.0294365
PTTG2	2.09036	0.029456
PRSS21	1.04061	0.0295894
GMFG	-1.40933	0.0298653
MAGEA12	1.67698	0.0298704
SPANXA1	2.47279	0.0299761
RDM1	1.60091	0.0301063
RBP7	-1.25249	0.0302239
RPL39L	1.14267	0.0302367
UCA1	1.89802	0.0302388
PRICKLE2	-1.07948	0.0303192
COMP	1.61933	0.0303725
SPAG5	2.02606	0.0304637
CCDC144NL	-1.00489	0.0305244
GINS4	1.10692	0.0305275
AGR2	1.2117	0.0306843
SPTSSB	2.34227	0.0306979
C1QB	-2.78711	0.0307142
BRIX1	1.26683	0.0307876
CDC25C	1.51954	0.0310918
AGBL1	-2.4324	0.0311042
CENPN	1.3435	0.0313661
VWF	-2.06593	0.0313682
CST6	-2.48491	0.0316878
MLANA	1.54119	0.0318778
PDZK1	1.68961	0.031898
RECQL4	1.42574	0.031898
ORM2	1.64266	0.0319259
APOC3	1.45983	0.0319785
CCDC74B	1.77991	0.0320324
MYL9	-1.77885	0.0320697
EFHA2	-1.05813	0.032213
POLQ	1.2417	0.0322221
MGC50722	1.09478	0.0322459
C15orf42	1.39536	0.0324355
ABI3BP	-1.11169	0.0326917
ASNS	1.02313	0.032708
ERCC6L	1.59756	0.0327167
CGA	1.23813	0.0327232
GIMAP4	-3.11928	0.0328506
TLR2	-2.30794	0.0328541
CYP2B6	-1.6687	0.0328708
RNFT2	1.10027	0.0328777
MAGEA1	1.87696	0.0328917
C6orf26	1.09233	0.0328968
NR0B1	1.65648	0.032909
FABP1	2.97535	0.0330254
TSLP	1.0649	0.0330498
VNN2	-2.33227	0.0330498
TDRD12	1.51164	0.0333005
MMRN2	-1.3248	0.0333074
FGA	1.39404	0.0337442
CLDN23	-1.48643	0.0337504
PTAFR	-1.27147	0.033759
PKMYT1	1.01011	0.033855
HLA-B	-1.13735	0.0343096
E2F1	1.03471	0.0343662
CDC6	2.03117	0.0343662
IGHA1	2.12261	0.034383
BUB1B	2.01994	0.034397
HBE1	2.17379	0.0344353
DSE	-1.4371	0.034453
B3GALT4	-1.57063	0.0345883
SPHK1	1.25393	0.0347627
TTK	1.62489	0.0347627
MLF1IP	2.00694	0.0348394
ASPM	1.98246	0.0349038
MT2A	-1.34102	0.0350168
PTX3	2.45644	0.0351396
CLEC3B	-2.54914	0.0352354
EGR1	1.33467	0.0354098
C8orf22	1.54766	0.0354165
CD274	-1.25073	0.0354626
AKAP13	-1.5929	0.0354626
PDCD1	1.17156	0.0354626
MUC1	-1.65353	0.0354896
ITGAM	-1.70344	0.0356039
TNIP3	1.09113	0.0357167
PRAM1	-1.78779	0.0358103
IGFBP1	3.59458	0.0358262
CALCR	1.11594	0.035862
RNASE1	-1.54542	0.0361344
KLRC3	1.09919	0.0361774
CD19	2.30444	0.0363563
MAD2L1	2.51649	0.0365525
PLA2G5	-1.24566	0.0366787
HSPD1	1.10798	0.0366787
RAD54L	1.90822	0.0368402
TBC1D7	1.32535	0.0371058
HCAR1	1.05551	0.0371058
KPNA2	1.08304	0.0371064
BCL6	-1.98156	0.0372127
KRT4	-1.57215	0.0372127
PECAM1	-2.83258	0.0372433
POTEG	1.02349	0.0372433
MAGEA4	1.50696	0.037309
SLC34A2	-1.91124	0.0374617
CHIA	-2.83032	0.0374651
LTC4S	-1.43965	0.0375678
EFEMP1	-2.03395	0.0376186
WIF1	-2.10653	0.0376511
CFD	-2.30839	0.0377536
C13orf15	-2.55652	0.037768
GTSE1	1.46244	0.037768
RHOXF2	2.32163	0.0379252
LOC645166	1.0193	0.037935
FST	1.49554	0.0380786
LRRFIP1	-1.01238	0.0381354
KIF18A	1.42083	0.0381542
MRAS	-1.15144	0.0382415
SERPINA3	-1.0583	0.0382415
MSX2P1	1.17955	0.0383815
MSH2	1.44617	0.0384315
APOB	2.54215	0.0384391
ICOS	1.1572	0.0384836
DSCR8	1.76063	0.0385593
GIMAP7	-2.85639	0.0385891
AFP	2.69496	0.0386785
CSTA	-1.61969	0.0387291
CKS1B	1.48824	0.0390139
PIM1	1.06418	0.0392601
C1QA	-2.49279	0.0395867
NCF2	-2.30118	0.0397391
DHRS2	1.81936	0.039746
TIPIN	1.01251	0.0398649
CDKN3	1.98481	0.0399359
POU5F1P3	1.70802	0.0400167
JUN	-1.25327	0.0401527
ATP1A2	-1.50069	0.0402032
HLA-C	-1.2457	0.0402592
KIF11	1.43397	0.0404031
CPS1	1.69627	0.0404635
TYR	2.17225	0.0405848
ZBTB20	-1.57083	0.0406295
VSIG2	-1.4611	0.0407254
[truncated: 88 more rows]

## Sheet: GSE92592 diffEXP
Gene	logFC	FDR
COL17A1	4.61918	6.02761e-43
EPB41L5	-1.81231	5.00796e-41
CDH3	2.92253	5.00796e-41
CCDC48	-2.06916	1.5054e-40
C10orf116	-1.96095	1.22777e-39
TMEM59L	3.58321	1.37697e-33
EMP2	-2.00965	1.61389e-31
MMP11	4.51377	8.45849e-30
CXCL14	3.34774	1.95998e-29
ALDH18A1	1.18292	2.14979e-29
PTGFRN	1.87102	2.24106e-29
LGI2	2.74865	4.81012e-29
CRLF1	3.52456	1.65799e-28
PLXNA4	3.07141	1.87318e-28
DAPK2	-2.0648	1.87318e-28
FHL2	2.29661	7.57372e-28
SERPINF1	2.11225	9.23012e-28
SLCO1A2	-6.62998	1.78085e-27
KRT17	3.85998	3.10886e-27
PTPRQ	-2.92539	8.97025e-27
GJB2	3.87844	1.47973e-26
VSIG10	-1.67566	4.0933e-26
COL10A1	3.71297	7.83152e-26
GPM6A	-2.77658	9.54989e-26
GALNT13	-3.8234	1.05949e-25
CYS1	-2.20916	1.28973e-25
CAV1	-1.72973	1.28973e-25
KIF26B	3.25797	1.68309e-25
PTPN21	-1.45078	1.84433e-25
C20orf160	-1.76095	2.17244e-25
MMP10	6.2764	2.17244e-25
MMP1	7.32774	2.73405e-25
GREM1	5.86751	3.07919e-25
ANKRD29	-2.08153	3.63783e-25
ABCA12	3.73604	5.38012e-25
XPNPEP2	2.94002	1.8413e-24
GPIHBP1	-2.65909	2.21467e-24
COL3A1	3.44409	2.98554e-24
AFF3	-1.82187	3.0299e-24
USHBP1	-2.01841	3.1853e-24
EPHB2	2.00015	3.1853e-24
NECAB1	-1.71046	3.30769e-24
IGF1	2.80604	3.48906e-24
TNS4	3.65231	4.08252e-24
PYCR1	1.99855	4.1956e-24
ADRB2	-1.48987	4.56017e-24
AGAP11	-1.91955	5.1878e-24
BACE2	1.3991	7.61698e-24
COL5A2	2.37645	9.51757e-24
COL15A1	2.55617	9.75667e-24
CTHRC1	3.2881	1.05431e-23
MMP7	3.84237	1.21397e-23
CHRDL2	3.59247	1.32468e-23
NGFR	2.73434	1.63212e-23
LYPD1	2.5047	2.72929e-23
TNNC1	-2.39953	2.76708e-23
S100A2	4.36294	2.80225e-23
FAM167A	-2.10471	5.72254e-23
SYT12	3.41309	6.67878e-23
SERPINB4	6.89709	1.11889e-22
C11orf9	-2.68068	1.25928e-22
FAM189A2	-2.24229	2.4332e-22
LOC285758	-2.85622	2.71506e-22
AGER	-3.12384	3.87103e-22
BAAT	3.27508	5.47245e-22
B3GALNT1	-1.46579	5.69132e-22
THBS2	2.84491	5.91943e-22
TNFRSF21	1.31379	6.13475e-22
HMGB3	1.66523	6.80035e-22
BTNL9	-3.0582	7.63695e-22
TIMP4	2.94166	8.25518e-22
ECEL1P2	-2.77985	1.10115e-21
STEAP1	2.55081	1.16932e-21
EFR3B	-1.82624	1.2894e-21
CAPN5	1.53545	1.34526e-21
PSAT1	2.86603	1.55662e-21
NPAS2	1.6858	3.11623e-21
SPON1	1.60274	3.54591e-21
KLRG2	-2.63071	4.65715e-21
PROM2	2.43497	5.78572e-21
SPRYD7	-1.20594	8.85366e-21
ITLN2	-4.61412	9.52034e-21
PLAC2	-2.32745	1.13307e-20
SELENBP1	-1.30898	1.22462e-20
COL6A3	2.22286	1.41252e-20
RTKN2	-4.15877	1.4851e-20
FAM83A	4.1719	1.57309e-20
C1S	1.47605	1.76219e-20
MAP3K15	-3.10751	2.45816e-20
COL14A1	2.61	2.59415e-20
TUBB3	4.1155	2.77558e-20
URB1	1.25743	2.77558e-20
GGT5	1.71648	2.8865e-20
CAV2	-1.48199	3.15451e-20
RAB40A	-2.29632	3.45064e-20
SERPINA5	3.17036	3.51625e-20
DENND3	-1.20711	3.85974e-20
MMP13	5.57992	4.06734e-20
C1orf198	-1.21152	5.48863e-20
P4HA3	3.08007	5.65493e-20
JPH1	-1.47917	5.68628e-20
SPTBN2	2.00912	6.16347e-20
ACADL	-1.99075	6.67977e-20
SLC5A9	-2.69687	7.09357e-20
IL13RA2	3.758	8.46171e-20
COL1A1	3.62989	8.46246e-20
ZNF385D	2.67415	8.46246e-20
GPX8	1.59006	8.46246e-20
SCAI	-1.29703	8.77592e-20
FAT2	3.60446	1.01647e-19
KRT15	3.44122	1.01647e-19
CPAMD8	-1.38669	1.10915e-19
MS4A15	-2.5249	1.10915e-19
SYT15	-1.71825	1.26501e-19
FBN1	1.8598	1.32393e-19
COL5A1	2.28785	1.59748e-19
ZNF469	1.91456	1.59748e-19
ARNTL2	1.8519	1.59748e-19
LTBP1	1.59385	1.59748e-19
TMEM45A	2.159	2.00515e-19
PLLP	-1.72623	2.04133e-19
SLC1A1	-1.55232	2.09951e-19
C19orf69	-2.98632	2.15089e-19
GRIA1	-2.59979	2.49124e-19
OTUD1	-1.36405	2.49124e-19
NOTCH4	-1.52528	2.51908e-19
FRMD5	2.41507	2.75276e-19
PVRL1	1.5217	2.79734e-19
C11orf35	-1.77898	3.41176e-19
COMP	4.38168	3.66161e-19
TSPAN13	-1.2336	3.71041e-19
FUT3	1.55868	3.71041e-19
PCSK1	3.44387	3.95151e-19
LOC643650	-1.75102	4.46236e-19
ARRB1	-1.39111	4.73416e-19
CFH	1.68583	5.84049e-19
LIFR	-1.80233	5.97537e-19
SEMA6A	-1.70073	6.52203e-19
HPCAL1	-1.26429	6.56265e-19
ANXA3	-1.83057	6.6712e-19
SRPRB	0.98469	6.85197e-19
ISM1	1.83386	7.7478e-19
LOC646324	-1.85429	8.07753e-19
ADAM12	3.22884	8.10516e-19
IGFBP4	1.40026	8.12849e-19
FBLIM1	1.60788	8.8274e-19
SPP1	4.58177	9.29881e-19
KRT16	6.44733	9.76531e-19
LOC100507632	-2.17439	9.99755e-19
PDIA4	1.06096	1.11911e-18
FGF11	1.91383	1.24034e-18
CLEC3B	-1.72179	1.24034e-18
C2orf91	-3.16027	1.30986e-18
HSD17B6	-2.12884	1.36804e-18
TNC	2.15857	1.5229e-18
C5orf65	1.70463	1.54586e-18
ARHGEF26	-1.67707	1.63552e-18
NMUR1	-2.33055	1.95494e-18
NPTX2	3.01431	1.99535e-18
CPNE4	2.75843	2.59397e-18
SLC9A3R2	-1.40279	2.69721e-18
STRA6	3.61257	2.88812e-18
GGTLC1	-2.54327	3.25604e-18
MYO3B	2.42468	3.49749e-18
CILP	2.684	3.61603e-18
GAP43	3.08211	3.67555e-18
RGS9BP	-2.59937	4.59344e-18
COL1A2	2.29405	4.82958e-18
SDPR	-1.80871	5.53287e-18
C1orf115	-1.1581	5.64895e-18
HYAL1	-1.45699	5.82375e-18
ADAM29	-4.24284	5.91705e-18
KHDRBS2	-2.06323	7.09233e-18
HIF3A	-2.21686	7.88264e-18
S100A3	-2.39056	7.88264e-18
KRT14	7.23793	8.55076e-18
OLFML2A	-1.64596	8.94934e-18
IL17RE	-1.27433	1.02454e-17
UNC13B	-1.02146	1.02626e-17
RNF128	-1.42302	1.09324e-17
FGFBP2	-3.05281	1.09807e-17
IGFBP5	1.96997	1.13036e-17
THY1	2.90617	1.17737e-17
MMP2	2.02751	1.23986e-17
NCS1	1.81458	1.24683e-17
P2RY6	1.88663	1.25663e-17
CRABP2	2.48711	1.38158e-17
WWC2	-1.50378	1.4728e-17
TRY6	6.77076	1.51637e-17
RAMP2	-1.59197	1.52258e-17
RARRES1	1.91859	1.5833e-17
CTNND2	-2.66195	1.61899e-17
ADAMTS14	2.74741	1.74123e-17
TMIE	-1.86834	2.07467e-17
KIAA1804	-1.45234	2.0829e-17
MME	-2.03742	2.17373e-17
ST6GAL1	1.36573	2.25204e-17
ALDH1A3	1.90998	2.25204e-17
LRRC36	-2.42487	2.25204e-17
SPRR1A	6.33912	2.47307e-17
GRM8	-3.69979	2.57165e-17
BHLHE22	2.23739	2.89846e-17
CASP12	-2.32542	3.09427e-17
TUBB2B	2.40355	3.17849e-17
MFAP3L	-1.52721	3.21071e-17
ITGA7	1.63781	3.45855e-17
HS6ST2	2.46759	3.55053e-17
HSPA12B	-1.48439	3.74648e-17
KANK3	-1.35002	4.00804e-17
CLDN10	2.82868	4.02558e-17
SSC5D	1.85053	4.24451e-17
NEBL	-1.07292	4.52799e-17
S100A4	-1.16232	4.54232e-17
C7orf10	1.91436	4.54232e-17
KLRF1	-2.58054	4.611e-17
COL18A1	1.37649	4.93048e-17
SERTM1	-4.2604	5.5231e-17
RXFP1	-2.58267	5.71936e-17
COL22A1	2.05124	5.92877e-17
IGFL1	5.23949	6.20397e-17
PION	-1.3584	7.00822e-17
CLIC5	-1.83764	7.57357e-17
TSHZ2	1.68183	7.64945e-17
LIMS2	-1.54923	7.78344e-17
FRY	-1.12743	8.38456e-17
SEMA6D	-1.86069	8.61936e-17
FAM69B	-1.43271	9.15521e-17
CNTN6	-2.21126	9.1794e-17
TMEM74B	-1.87775	9.58815e-17
LMO7	-1.32547	9.59877e-17
SNX22	-1.9093	9.6269e-17
CERCAM	1.88477	1.00405e-16
HEPH	1.32525	1.0425e-16
C1R	1.377	1.1344e-16
PPP2R5A	-0.798115	1.1344e-16
FUT2	2.67821	1.28309e-16
KLF2	-1.57656	1.29806e-16
GPR87	4.19733	1.33514e-16
KRT6A	7.11988	1.37922e-16
SEMA3B	-1.26391	1.38174e-16
PDZD2	-1.38073	1.49304e-16
ZBED2	-2.42774	1.50681e-16
SEC24D	1.0954	1.6181e-16
CTNNBIP1	-0.876908	1.62117e-16
ROR2	1.93003	1.6644e-16
PCDH7	1.73558	1.82326e-16
ADAM23	2.39499	1.98059e-16
DIO2	3.14422	2.03282e-16
TTYH3	1.22175	2.0687e-16
VCAN	2.10995	2.0687e-16
STARD9	-1.44914	2.19057e-16
LOC643733	-1.91181	2.32241e-16
GMDS	1.09869	2.35454e-16
CALU	1.18744	2.4795e-16
SRPX2	1.55012	3.2055e-16
GOLM1	1.32439	3.2055e-16
TPBG	1.15761	3.47875e-16
CLMP	2.14841	3.55517e-16
LRRN1	1.8043	3.86234e-16
WISP1	2.76833	3.92092e-16
DISP1	-1.37021	4.08403e-16
DOCK4	-1.06194	4.4408e-16
FAM20C	1.47554	4.51737e-16
LAMA3	-1.32155	5.21575e-16
MMP14	1.46736	5.64821e-16
HR	1.78734	6.13633e-16
CLIC3	-1.85821	6.38234e-16
SHANK3	-1.39195	6.62978e-16
CHPF	1.32935	6.6802e-16
CA2	-1.73694	6.68463e-16
NEDD4L	-1.02982	6.68463e-16
ACE	-1.46922	6.80601e-16
ALS2CL	-1.46738	7.53405e-16
LIMD1	-0.824389	7.6807e-16
ARAP2	-1.01391	8.89246e-16
LOC100144595	-5.18825	9.01918e-16
LOC284080	-1.66931	9.52e-16
FLJ34503	-3.29995	1.01388e-15
EMILIN1	1.74638	1.06324e-15
DLG2	1.63083	1.15663e-15
CTSK	1.77921	1.16132e-15
SCAMP5	1.92822	1.16496e-15
FERMT1	1.81956	1.21377e-15
ARAP3	-1.31385	1.24694e-15
IGFALS	-1.66236	1.34778e-15
NOSTRIN	-1.30078	1.39537e-15
LEPREL2	1.43134	1.52323e-15
MOXD1	1.73269	1.59313e-15
ETV5	-1.17569	1.63704e-15
AATK	-1.64001	1.72167e-15
RCC1	1.01783	2.08331e-15
ODZ4	1.69447	2.10336e-15
COL7A1	1.88097	2.18799e-15
VSIG2	-1.25412	2.28274e-15
SERPINE2	2.36079	2.44064e-15
ALDH1L2	1.71789	2.44958e-15
DAPK1	-1.08433	2.48352e-15
MGAT3	-1.46126	2.83639e-15
RAB17	-1.20042	2.83639e-15
SLC2A5	2.37172	2.91546e-15
LOC375010	-2.31809	3.10487e-15
CCRL1	-1.58879	3.17469e-15
SULF1	2.40643	3.69278e-15
NXF3	-2.47489	3.74804e-15
UGT1A6	4.1248	4.20637e-15
MC4R	4.95594	4.21491e-15
FAM83B	3.03865	4.31614e-15
ARHGEF15	-1.34878	4.31614e-15
UNC13D	-1.13641	4.45907e-15
LEPREL1	-1.47937	4.85228e-15
PLEKHA1	-0.910903	5.07097e-15
FBLN2	2.10046	5.48376e-15
GPD1L	-0.873971	5.51878e-15
ARHGAP29	-1.15979	5.64655e-15
TSPAN12	-1.41561	6.09436e-15
DSG3	3.52533	6.18614e-15
OCLN	-1.13918	6.40475e-15
LINC00032	-2.30735	6.58014e-15
LBP	6.33858	7.15436e-15
FUT8	0.926416	7.19935e-15
INPP5K	-0.832778	8.21462e-15
PLAG1	-1.41711	8.52179e-15
NRBP2	-1.07244	8.52863e-15
EDNRB	-1.55604	8.53268e-15
LOC388630	1.56614	8.76891e-15
SULT1A2	-1.71491	8.82144e-15
DACH1	-1.37463	8.89022e-15
BASP1	1.45436	9.01393e-15
SLC1A4	1.39994	9.0313e-15
ITGA11	2.76545	9.17506e-15
LRRN3	-1.8669	9.17774e-15
PARD6B	-1.41404	9.25398e-15
PRDX4	1.26895	9.31715e-15
STX11	-1.34032	9.64228e-15
SUSD2	-1.2961	1.00203e-14
SH2D3C	-1.32068	1.00411e-14
SEL1L3	1.23757	1.08238e-14
PTPRZ1	2.52933	1.13665e-14
MRVI1	1.42881	1.15344e-14
FAM125B	-1.0652	1.24798e-14
RS1	-2.16897	1.25477e-14
MAP4K2	-0.999198	1.26811e-14
FLT4	-1.09215	1.27899e-14
TDRD10	-1.72874	1.31385e-14
COL4A3	-2.12121	1.31385e-14
EPHA10	2.26269	1.32066e-14
ALDH1B1	1.33159	1.32467e-14
OBSCN	-1.39607	1.36223e-14
BAI2	1.77284	1.36223e-14
SEMA5A	-1.42993	1.38318e-14
PAPPA	3.26153	1.45097e-14
ASPG	-3.23532	1.45726e-14
EYA2	2.09651	1.47241e-14
SHMT2	0.887477	1.67836e-14
EXOC3L1	-1.47171	1.79517e-14
FCRL5	2.86865	1.84619e-14
GRAMD2	-1.30582	2.04681e-14
CA4	-3.21083	2.08885e-14
FLJ16779	3.28442	2.19352e-14
F2RL2	2.53925	2.46858e-14
SOSTDC1	-3.15117	2.70593e-14
NCR1	-2.09182	2.71518e-14
FKBP10	1.31916	2.81218e-14
FLJ42875	-1.5396	2.95605e-14
FLJ41200	4.81448	3.08e-14
SH3GL3	-2.34374	3.09781e-14
MXRA5	1.95828	3.2819e-14
SCRG1	2.89089	3.2819e-14
F11	-2.40707	3.51266e-14
FLNC	2.34196	3.55968e-14
CLEC14A	-1.11631	3.61208e-14
LOXL1	1.51429	3.65179e-14
H2AFY2	0.859716	3.69998e-14
KAL1	-1.68565	3.70243e-14
N4BP2L1	-1.0317	4.36441e-14
MEX3A	1.76913	4.41967e-14
PTPRB	-1.40765	4.5507e-14
SAA2	3.98624	4.61363e-14
FBXO32	1.62605	4.94473e-14
GNLY	-2.38101	5.51327e-14
TMEM88	-1.97903	5.51327e-14
CLU	1.24327	5.5377e-14
TFAP2A	2.80408	5.588e-14
MYEOV	2.5862	5.67979e-14
FCRL6	-1.7499	5.72293e-14
CD209	1.8571	5.98953e-14
OAF	1.45196	6.03288e-14
KRT5	4.50872	6.03288e-14
CLEC4G	3.22745	6.03373e-14
NCKAP5	-2.09684	6.39771e-14
SLC19A3	-2.07245	6.4107e-14
ADAMTS2	1.49049	6.5822e-14
MPP3	-1.75673	6.5822e-14
SYCP2L	-2.0722	6.71538e-14
LOC554223	-2.79977	6.74644e-14
LAMP5	1.8077	7.16766e-14
UNC80	-2.04051	7.60724e-14
MYO1E	0.974624	7.8993e-14
CTSE	1.94636	7.96469e-14
OLFM1	1.07249	7.96469e-14
B3GNT3	3.23096	8.1699e-14
KLF4	-1.70827	9.0781e-14
TAL1	-1.52533	9.79516e-14
SLC5A4	-1.81092	1.02641e-13
PODNL1	1.91661	1.03983e-13
SDK1	1.32575	1.04098e-13
EGFL7	-1.52824	1.11123e-13
CST2	4.28685	1.11301e-13
KDELR3	1.2228	1.11629e-13
JUN	-1.42625	1.11959e-13
DPP6	-2.84961	1.18048e-13
ABP1	2.38958	1.21098e-13
SH3PXD2B	1.95861	1.22574e-13
WNT3A	-2.10773	1.23922e-13
CHST15	1.07788	1.31418e-13
PRSS1	5.16447	1.33726e-13
SPRR1B	6.62598	1.41093e-13
CACNA1G	2.44846	1.432e-13
MAP1B	1.80018	1.47795e-13
RAB3C	2.37745	1.51835e-13
AGTPBP1	-0.765093	1.52709e-13
MYO7B	-2.12598	1.56274e-13
NKG7	-1.8046	1.5639e-13
GLB1L3	3.50949	1.66641e-13
ADAM28	1.46144	1.68723e-13
BEND6	1.79901	1.69651e-13
ATP2A2	0.90411	1.72471e-13
DOK5	2.35732	1.76102e-13
C5orf4	-1.23402	1.78139e-13
ACTN1	1.03886	1.9004e-13
HIGD1B	-1.55121	1.90126e-13
CAPN13	2.19441	1.96899e-13
VEGFA	-1.38973	1.98616e-13
FKBP11	1.55523	2.0659e-13
GCNT3	2.77017	2.12813e-13
FUT1	-1.55895	2.21517e-13
TSPAN7	-0.930543	2.35714e-13
CARD16	-1.35374	2.41337e-13
CYP1B1	2.60628	2.44312e-13
ACAN	2.95982	2.4797e-13
ATP10B	3.07586	2.61857e-13
SULF2	1.30512	2.75709e-13
ITGB4	1.41875	2.88374e-13
PLA2G7	2.02983	2.9141e-13
SERPINB5	4.38689	3.0675e-13
ATP8B5P	-1.82736	3.0675e-13
MYZAP	-2.20739	3.17683e-13
SRRM3	1.72191	3.17683e-13
ASPN	1.87936	3.46387e-13
TDO2	2.71202	3.61349e-13
HTR2A	2.39954	3.6937e-13
SH3PXD2A	1.02068	3.78562e-13
SLC14A1	-2.93385	3.83539e-13
GPC1	1.18751	3.93857e-13
DNM3	-1.04454	4.23508e-13
RXRG	-1.9139	4.43636e-13
CCDC68	-1.59291	4.47281e-13
TMEM229A	2.6852	4.93601e-13
PLTP	1.48663	4.96138e-13
BCL2L15	1.44498	5.00761e-13
FAM189A1	-1.95392	5.26861e-13
CCL13	2.09223	5.48923e-13
SLC2A1	1.62714	5.62247e-13
N4BP1	-0.701284	6.11335e-13
MATN3	-1.63789	6.23203e-13
KCNMB4	-1.45333	6.53332e-13
CGN	-1.01407	6.59874e-13
ADAMTS16	3.54281	6.74429e-13
HEY1	-1.64383	7.52123e-13
UACA	-1.07921	7.76068e-13
NHSL1	-0.902342	7.76068e-13
CHI3L1	2.24751	7.76068e-13
WIPI1	0.774804	7.81821e-13
SLC16A2	1.0404	7.9439e-13
SCARF1	-0.944867	8.16528e-13
AMIGO2	-0.935815	8.20038e-13
NINJ2	-1.09351	8.26292e-13
GNAO1	1.2971	8.3794e-13
CPNE5	2.04624	8.42907e-13
STEAP3	1.27084	8.56532e-13
MPZL1	0.819754	8.59412e-13
ZNF541	-1.63213	8.59412e-13
S1PR5	-1.61064	8.88692e-13
NTN1	1.80533	9.02e-13
RET	1.63413	9.64323e-13
MRO	2.13049	1.01302e-12
ANGPTL7	-2.11673	1.04127e-12
PFKP	1.08859	1.08351e-12
RHOV	3.18214	1.09166e-12
PCP4	3.76702	1.0975e-12
POU2AF1	2.7383	1.0975e-12
DPEP2	-1.24998	1.10001e-12
EMCN	-1.29318	1.10989e-12
FZD8	-0.990175	1.17426e-12
TJP1	-0.872213	1.19803e-12
MYO15B	-1.42025	1.25438e-12
SYNJ2	1.16586	1.28742e-12
ACTG2	2.27624	1.2989e-12
MFAP2	1.71259	1.30184e-12
PGM2L1	1.17816	1.30386e-12
PDE6A	-1.8148	1.32476e-12
KRT13	3.81857	1.37903e-12
CXADR	-0.929061	1.44437e-12
SAMD11	1.7765	1.47784e-12
S1PR3	1.58014	1.58068e-12
DNAJC22	2.46507	1.58523e-12
FOXP3	1.56479	1.59051e-12
AGR2	1.67187	1.67029e-12
PRX	-2.03254	1.67029e-12
PCDH12	-1.54959	1.72128e-12
LOC150622	-3.64533	1.72393e-12
PTN	-1.23062	1.80133e-12
ASS1	0.814053	1.85135e-12
NIM1	-1.66305	1.85135e-12
ADM2	2.32436	1.85135e-12
NDRG4	-1.81861	1.98012e-12
PTGES	1.63454	2.02206e-12
MST1P9	-1.97792	2.04352e-12
GDF15	1.97413	2.06573e-12
BFSP1	-1.42377	2.12294e-12
WFDC2	2.04277	2.16424e-12
RASAL1	1.81301	2.19842e-12
ABTB1	-0.8178	2.30361e-12
SLAIN1	-0.94603	2.32194e-12
MCOLN3	-1.43232	2.35391e-12
PODN	1.57225	2.35397e-12
TCAP	-2.02268	2.43751e-12
GNG11	-1.15288	2.49069e-12
POSTN	2.52211	2.83616e-12
KIAA1984	-1.26778	2.94115e-12
RRAS	-0.990727	2.94891e-12
SFXN1	0.712581	2.97116e-12
LOC646862	3.35542	3.0017e-12
ESAM	-1.01077	3.0794e-12
CRTAC1	-1.85037	3.08798e-12
CDH2	2.37183	3.10387e-12
CLEC11A	1.39047	3.24687e-12
LTK	-1.93225	3.48434e-12
PIM2	1.92716	3.48966e-12
TTPA	-2.09854	3.51924e-12
HYOU1	1.02198	3.71622e-12
MUC4	2.70165	3.71622e-12
TPST1	1.05715	3.78849e-12
CACNB4	-1.43653	3.80177e-12
GYPE	-1.87637	3.8039e-12
KCTD19	-1.99607	3.8039e-12
CCDC85A	-1.58998	3.80547e-12
PDLIM4	2.01209	3.82686e-12
L3MBTL4	-0.854117	3.83929e-12
NCDN	0.840685	4.02773e-12
GDPD5	-1.21302	4.08737e-12
PAICS	0.873804	4.1981e-12
TBX21	-1.52895	4.19903e-12
CYP19A1	3.29645	4.24807e-12
SDK2	1.60573	4.326e-12
PAQR5	-0.950647	4.50174e-12
GAB1	-0.964151	4.50174e-12
MMP28	-1.01342	4.65248e-12
ARGLU1	-1.22201	4.84147e-12
VSTM2L	2.08583	4.96602e-12
SCG5	2.31243	5.08415e-12
LGALS7B	4.70905	5.40017e-12
UBA7	-0.812905	5.41398e-12
PRRX1	1.22059	5.56136e-12
LOC401463	2.06229	5.57972e-12
CD180	1.81495	5.69896e-12
RIMKLA	-1.31482	5.81149e-12
IHH	-2.12276	5.81383e-12
LOX	1.21898	6.07993e-12
ST6GALNAC5	-1.42959	6.2064e-12
CD160	-1.59592	6.52923e-12
SDS	2.38918	6.92705e-12
CDC6	1.27538	7.18052e-12
MAP1A	1.92945	7.39745e-12
C1QL2	3.56494	7.39745e-12
C6orf174	-1.83933	7.84533e-12
BOC	1.81809	8.26861e-12
KIAA1683	-2.28426	8.2708e-12
MZB1	2.73138	8.46722e-12
PLEKHA4	1.17623	8.70815e-12
IGDCC4	2.08041	8.84894e-12
CYP27C1	2.19148	8.84894e-12
MCHR1	2.95727	8.93251e-12
AGRP	-2.2394	9.05331e-12
BDNF	-1.87852	9.74769e-12
DERL3	2.25313	9.85082e-12
CADM1	-1.03571	1.02404e-11
UPK3B	-2.41685	1.02984e-11
COL11A1	4.42196	1.0558e-11
FAM198A	1.46772	1.06282e-11
DGKE	-1.0185	1.06596e-11
COL6A1	1.17323	1.09567e-11
CD177	2.8891	1.1684e-11
TAPT1	-0.807133	1.2007e-11
HPSE2	1.75546	1.21249e-11
CGREF1	2.46773	1.25818e-11
CYP1A2	-3.03825	1.28062e-11
WNT7A	-1.67335	1.3053e-11
TMEM200C	2.15993	1.30868e-11
TMEM158	2.08625	1.31494e-11
ENHO	-2.32147	1.37516e-11
FAM105A	-1.28248	1.37975e-11
EMR1	-2.26481	1.37975e-11
FSTL1	1.24107	1.45693e-11
HS6ST1	1.11064	1.61854e-11
KLF6	-1.23149	1.61932e-11
MYCT1	-0.899291	1.64692e-11
TAGLN	1.3259	1.64728e-11
TMPRSS4	3.50379	1.65026e-11
LRRC17	1.36807	1.74469e-11
LOC100505865	-1.32394	1.74471e-11
C11orf24	0.928911	1.75069e-11
LOC90246	-1.42897	1.77431e-11
CD248	1.7816	1.77679e-11
QRICH2	-1.52754	1.85677e-11
SFRP2	2.74983	1.88591e-11
LOC100190938	-1.51065	1.91633e-11
PRF1	-1.50829	1.91633e-11
SULT1A1	-1.25208	1.91756e-11
AVPR2	-1.61309	1.92452e-11
IGFL2	4.31823	1.93044e-11
CSMD2	2.0604	2.11497e-11
PITPNM2	-0.91068	2.14235e-11
CABLES1	-1.04437	2.15392e-11
HELT	-3.04462	2.16438e-11
HIF1A	1.8055	2.17528e-11
HSP90B1	0.739678	2.27322e-11
FGD5	-0.839217	2.28049e-11
GLIS3	1.11122	2.30498e-11
BEX1	-1.79787	2.49831e-11
LOC96610	2.7942	2.5399e-11
CPXM1	2.95885	2.55647e-11
GIMAP1	-0.959883	2.70072e-11
IL1R1	1.15692	2.76183e-11
TMEM176B	0.951253	2.76183e-11
ZNF704	-1.01942	2.76183e-11
FAM83D	2.10247	2.76907e-11
NGB	5.11005	2.77676e-11
PCOLCE	1.16986	2.77676e-11
GAS7	1.18713	2.81309e-11
ZNF385B	-1.54427	2.92461e-11
FGF12	-1.69666	3.02964e-11
ACCN2	1.76736	3.03126e-11
FAP	1.73149	3.04253e-11
LOC283089	-2.16359	3.07977e-11
DOCK6	-1.00895	3.13858e-11
NOVA2	-1.41964	3.20491e-11
FAM13A-AS1	-1.61134	3.218e-11
KCNMA1	1.41064	3.30127e-11
PPP1R9A	-0.910611	3.35292e-11
GATA3	-1.49238	3.45063e-11
LEPREL4	1.12034	3.46804e-11
GCLC	1.05548	3.47519e-11
AHCY	0.64502	3.55178e-11
FAT1	1.11831	3.55826e-11
NME1	1.21628	3.55826e-11
SSR4	1.26028	3.6166e-11
LINC00312	-1.60255	3.61676e-11
NETO1	3.89202	3.67396e-11
CTNNAL1	-0.979412	3.68076e-11
RNF144B	-0.908878	3.68421e-11
GPX2	2.21497	3.72871e-11
ADRA2A	1.36284	3.89438e-11
CYP3A5	-2.24426	3.91965e-11
ST6GALNAC1	2.051	3.99709e-11
SEC61A1	0.733495	4.10685e-11
C5orf56	-1.04002	4.14362e-11
PI15	3.20759	4.22192e-11
BTNL8	-1.91488	4.56514e-11
DRD5	2.80064	4.61868e-11
LAX1	1.8274	5.09955e-11
TIE1	-0.918602	5.21538e-11
ROBO1	0.908622	5.54898e-11
TMEM215	3.3385	5.605e-11
DNAJC18	-0.835822	5.605e-11
LOC100131726	3.24166	5.68532e-11
GPRIN2	-1.42986	5.68532e-11
RBP2	-2.22671	5.70117e-11
CX3CR1	-2.04982	5.71987e-11
CD244	-1.67108	5.73173e-11
LOC100287846	1.7969	5.96082e-11
CLDN18	-2.10626	6.00059e-11
TNFSF10	-1.24547	6.01255e-11
FREM2	-1.19599	6.09051e-11
DHRS12	-0.851571	6.19367e-11
CFI	0.91315	6.23194e-11
OSR2	1.64872	6.43503e-11
KCTD1	1.37997	6.68414e-11
LHFPL3	-2.21874	6.78476e-11
CXCL6	3.74542	6.79285e-11
ECE2	1.30507	6.93164e-11
LGALS4	-1.73046	7.05112e-11
ITM2A	-1.01179	7.28731e-11
HM13	0.753848	7.31195e-11
REEP2	1.6238	7.4373e-11
HLA-E	-0.923591	7.47323e-11
MAGED1	0.714368	7.65435e-11
ZMAT1	-1.29183	7.67417e-11
WASF1	1.01431	8.09351e-11
UCN2	2.70654	8.09525e-11
MIR31HG	3.24756	8.17609e-11
SAA2-SAA4	4.12981	8.25458e-11
BHLHA15	2.79684	8.63509e-11
FKBP14	1.16683	8.81342e-11
INHBB	1.68236	8.89226e-11
SSTR1	-1.89472	9.03815e-11
SAA1	3.69395	9.753e-11
DCLK1	1.4944	9.9064e-11
SLC6A8	1.02713	1.03933e-10
RAMP1	1.51041	1.03933e-10
KLRD1	-1.79093	1.04106e-10
ITM2C	1.21014	1.06193e-10
CXCL12	0.98507	1.11617e-10
KCNN4	1.27925	1.15758e-10
TEK	-1.21394	1.15758e-10
MTHFD2	1.38588	1.1953e-10
FAM46C	1.41708	1.19747e-10
C17orf51	1.07794	1.21907e-10
ADRB1	-1.80304	1.22804e-10
IL2RA	1.85079	1.22997e-10
ST14	0.893731	1.24217e-10
FZD5	-0.982144	1.24782e-10
VAMP2	-0.644569	1.27821e-10
TCN1	4.14972	1.28833e-10
CILP2	3.52088	1.36716e-10
PIGA	-1.26701	1.37154e-10
C21orf90	-2.09342	1.37173e-10
PC	1.13477	1.40477e-10
SLC38A11	1.8395	1.40864e-10
CLCA2	3.68098	1.42104e-10
XAF1	-1.37933	1.59975e-10
SPOCK2	-1.60913	1.61176e-10
HOXD-AS1	-1.25445	1.65939e-10
STEAP2	1.49218	1.65939e-10
KLHDC7A	1.56413	1.70552e-10
ECM1	1.1032	1.71375e-10
LGALSL	-1.04389	1.74587e-10
FAM69A	0.883674	1.74854e-10
EPOR	-1.21047	1.75559e-10
ELK2AP	3.99615	1.76378e-10
RASIP1	-1.08733	1.76451e-10
SLC39A8	-1.40423	1.77205e-10
FAM176A	-1.04221	1.77889e-10
DES	1.89517	1.79263e-10
TMEM176A	1.01086	1.8281e-10
ANKRD44	-0.973336	1.82916e-10
ZNF185	-0.711039	1.84056e-10
SFTA1P	-1.30391	1.89356e-10
EXD1	-2.85671	1.89356e-10
CADM2	-2.37969	1.90672e-10
LOC100499467	2.02711	1.97054e-10
TACR1	1.83754	1.98666e-10
HSPA5	0.761975	2.00619e-10
FGF7	1.64125	2.05859e-10
RAB11FIP1	-0.970126	2.10718e-10
TP63	1.8944	2.11906e-10
C11orf67	-0.808188	2.14917e-10
PNPLA7	-1.40749	2.14961e-10
MGAT2	0.678119	2.24466e-10
O3FAR1	-1.90374	2.28135e-10
SYNDIG1	1.66505	2.3308e-10
STAB1	0.864241	2.33248e-10
SLC22A10	-2.30236	2.39533e-10
C8B	-2.97185	2.43536e-10
GSDMC	1.70327	2.49188e-10
LOC730102	-1.01821	2.5592e-10
LOC400940	-4.07614	2.57543e-10
ADAMTS18	3.19223	2.5784e-10
ESR2	1.68999	2.58462e-10
DHRS2	-2.23508	2.626e-10
LOC158376	-1.54881	2.6676e-10
KCNG2	2.34967	2.6877e-10
GALNT2	0.981613	2.6979e-10
NR1H4	-2.74318	2.72157e-10
ENTPD1	0.794892	2.74155e-10
KCNK17	-1.7157	2.82391e-10
ACOXL	-1.30555	2.83058e-10
GALNTL2	2.16014	2.83166e-10
LRRK1	0.786484	2.83776e-10
ZMAT3	1.01758	2.9024e-10
LCN2	2.91348	2.96122e-10
RHOBTB1	-0.753623	2.96122e-10
CCND2	0.71848	2.98769e-10
CGNL1	-1.00445	3.1076e-10
LOC100507091	-1.77107	3.1785e-10
SERPINA3	2.17402	3.2061e-10
CKAP4	0.973328	3.26943e-10
FABP12	-4.25984	3.44445e-10
BMP2	-1.54215	3.48282e-10
PRSS3	2.5447	3.64992e-10
TRPV6	1.57578	3.79215e-10
LXN	1.10625	3.87087e-10
IDH2	0.778285	3.9023e-10
REPS2	-0.868048	3.99228e-10
ALPK2	2.4386	3.99228e-10
APOL3	-0.981811	4.01289e-10
PAPSS2	-1.01154	4.03301e-10
OSTC	0.66079	4.21103e-10
FER1L4	2.02714	4.21103e-10
LOC284578	-1.35957	4.21103e-10
SORD	1.08638	4.2581e-10
STARD13	-0.796081	4.26524e-10
ARHGEF10	-0.959485	4.34674e-10
HECW1	2.06989	4.35476e-10
SFTPC	-1.64867	4.39501e-10
ADCY4	-1.14247	4.42008e-10
LRRC19	-1.8453	4.45232e-10
CNN1	1.7327	4.48007e-10
PLAGL1	-0.8442	4.86393e-10
MRAP	1.87818	4.87588e-10
ST8SIA6	-2.10505	4.93612e-10
PPP1R13B	-0.726207	5.01888e-10
TBX2	-0.915829	5.03219e-10
LOC400550	-2.11068	5.06032e-10
ITGB3	1.39785	5.0797e-10
LOC285441	-2.43085	5.0797e-10
FAM162B	-1.25505	5.33387e-10
KIAA1211	1.44692	5.87413e-10
CDKN1C	-0.943866	5.92512e-10
TRIM2	1.04701	5.94068e-10
TMEM139	-1.36136	5.94068e-10
OLFML2B	1.0839	6.31989e-10
LAMA2	1.27916	6.42251e-10
RBMS2	-0.773243	6.56678e-10
UPB1	-1.70057	6.59665e-10
STXBP6	-1.67273	6.78021e-10
ADCY8	-3.11412	6.80763e-10
IVL	3.28149	7.01512e-10
SCG2	1.9079	7.03621e-10
SPAG4	1.80504	7.04917e-10
IGLL5	2.48742	7.11364e-10
RGMA	1.4964	7.19134e-10
GGA2	-0.712596	7.20164e-10
NUCB2	0.856578	7.27584e-10
EFNB2	-0.949454	7.27928e-10
C7orf41	-0.89132	7.37809e-10
DANCR	0.775448	7.40953e-10
COL6A2	1.0976	7.4464e-10
FJX1	1.55251	7.44656e-10
LOC283299	-1.77477	7.58954e-10
KIAA1199	1.84437	7.61142e-10
MSI2	1.15935	7.83822e-10
LOC730755	4.15871	7.91178e-10
FRMPD1	-2.05275	7.93354e-10
SRM	1.09294	7.99816e-10
LINC00261	-1.10542	8.05499e-10
IL11	3.11271	8.05499e-10
SLC39A7	0.68108	8.08626e-10
C14orf37	1.43265	8.14524e-10
KCNS2	2.67023	8.15746e-10
SHANK1	1.68698	8.27741e-10
DLC1	-1.15322	8.46891e-10
TBC1D16	1.09398	8.87448e-10
TGFB3	1.11862	9.17412e-10
FOS	-1.99384	9.40305e-10
MEIS3	1.26092	9.41621e-10
GABBR2	3.04294	9.49591e-10
PTPRM	-0.663755	9.61165e-10
TMEM132E	2.03087	9.86245e-10
CPXM2	1.50187	9.92221e-10
HNF1B	-0.945269	9.93282e-10
CHPF2	0.723156	9.93282e-10
RPL23AP32	-3.30719	1.00037e-09
XBP1	1.07162	1.00067e-09
DSCR6	-2.23288	1.01537e-09
HDLBP	0.731363	1.0268e-09
NR2C1	-0.879074	1.03235e-09
SMO	1.08822	1.045e-09
THBS4	1.40187	1.10448e-09
CXCL2	-2.30748	1.11548e-09
SYT1	-1.53467	1.11926e-09
LOC283710	2.18006	1.15437e-09
CAPN3	-1.27865	1.1587e-09
LOC645591	-2.73136	1.17258e-09
AK4	1.46925	1.21455e-09
CRABP1	3.78791	1.2246e-09
GABRE	-1.4851	1.22893e-09
FUT6	2.63999	1.24805e-09
DNAJB5	0.946106	1.25028e-09
SPDEF	2.04768	1.26484e-09
GDA	2.54793	1.27717e-09
B3GNT1	-0.681306	1.34879e-09
SERPINB6	-0.829481	1.37253e-09
CD24	1.52314	1.37253e-09
WDR12	0.837304	1.46156e-09
HSPA4L	1.53185	1.49191e-09
ALDH4A1	0.836506	1.51908e-09
SGMS1	-0.649537	1.52769e-09
UXS1	-0.629762	1.5487e-09
SERINC2	1.18217	1.55574e-09
SESTD1	-0.690924	1.63357e-09
OVCH2	-1.86841	1.66606e-09
RAB6B	0.903293	1.66911e-09
ARHGAP6	-0.840429	1.73549e-09
C11orf21	-1.4901	1.76738e-09
PDE1A	1.27859	1.7798e-09
CREB3L2	0.798569	1.8081e-09
SH3RF3	0.863378	1.86876e-09
KLK12	3.1032	1.87044e-09
CDKL2	-1.19312	1.93702e-09
SEMA3E	-1.54287	1.98426e-09
GLIS1	2.23781	2.02667e-09
OVCH1	-1.98223	2.02802e-09
SLC24A4	-1.36322	2.04303e-09
CASP3	0.575613	2.10537e-09
MST1P2	-1.24678	2.11354e-09
LDB2	-0.910856	2.14082e-09
CP	2.22343	2.1895e-09
CHL1	1.26103	2.2161e-09
PARP12	-0.767229	2.26498e-09
LIMCH1	-0.959317	2.27886e-09
FOLR3	-2.59366	2.31988e-09
LCAT	-1.31205	2.33607e-09
KCNA4	-1.98658	2.33627e-09
CBLC	1.40254	2.35082e-09
PMM1	-0.810808	2.38093e-09
PLCH2	1.53001	2.38761e-09
RADIL	-1.12457	2.49352e-09
ANGPT4	-1.90248	2.53582e-09
FAM98A	0.575489	2.55297e-09
IER5L	1.36933	2.56013e-09
TKTL1	-2.83453	2.56013e-09
CDH5	-1.0396	2.60275e-09
PNOC	2.29987	2.70116e-09
B4GALT4	0.628668	2.72689e-09
SFTA3	-1.05538	2.75158e-09
RGN	-1.01782	2.80051e-09
RALGPS2	1.19726	2.81125e-09
MYH11	1.5566	2.90043e-09
PAX9	2.33766	3.01106e-09
TRPC3	-1.51677	3.06804e-09
SNX9	0.802174	3.11854e-09
GIMAP8	-1.00209	3.14045e-09
CLDND2	-1.43835	3.17577e-09
ALPPL2	-2.45525	3.21365e-09
EDN3	-2.8345	3.22928e-09
SLC17A9	1.24825	3.29701e-09
P4HB	0.679308	3.37142e-09
FAM76A	-0.706166	3.37142e-09
SCARA3	1.06628	3.38312e-09
LOXHD1	-1.36779	3.44045e-09
INSC	-1.80719	3.4718e-09
CYP24A1	3.72952	3.48581e-09
RTN1	-1.07346	3.49823e-09
MMP9	2.32052	3.49823e-09
RGS6	-1.47452	3.51856e-09
EPYC	2.9848	3.5539e-09
IL11RA	-0.83294	3.55476e-09
GPSM1	-1.03374	3.58113e-09
UHRF1	1.1835	3.73129e-09
GFPT1	0.590703	3.91376e-09
ACTBL2	2.19839	3.93918e-09
ZNF385C	-1.35401	3.93918e-09
CECR2	-1.3611	4.002e-09
LST1	-1.20098	4.03168e-09
FAIM2	1.6372	4.04719e-09
ASB9	-1.04086	4.08216e-09
JSRP1	2.6993	4.15191e-09
CHST6	2.64759	4.18397e-09
LOC147646	-2.29812	4.21263e-09
MMP3	3.3027	4.26797e-09
ICMT	0.612701	4.29196e-09
CBLN4	2.47303	4.38002e-09
PRKG2	-1.74562	4.50855e-09
CABP4	-1.23042	4.51064e-09
FNDC4	1.67412	4.56976e-09
PPIB	0.734527	4.62177e-09
LOC100288077	2.39853	4.68856e-09
SNED1	0.731362	4.71655e-09
RNF182	-1.31638	4.77688e-09
TMEM125	-0.915744	4.81177e-09
FAM150A	2.13855	4.84941e-09
YPEL1	-0.86531	4.85703e-09
STMN3	0.760715	4.90785e-09
HPGD	-1.80384	4.90785e-09
C13orf15	-1.17018	5.03585e-09
KIAA0930	0.662325	5.03585e-09
MYO1A	-1.70697	5.03585e-09
KLF8	-0.851989	5.10601e-09
EIF4G3	0.583508	5.34383e-09
GMPPB	0.789289	5.38739e-09
TSPAN11	1.37816	5.44814e-09
PEAR1	-0.804434	5.48438e-09
CD5L	-2.11249	5.52049e-09
ASB2	1.33798	5.64154e-09
ELN	1.40316	5.80178e-09
SGCG	-1.95823	5.81485e-09
FHL3	1.05515	5.90774e-09
EMILIN3	-1.65522	5.91918e-09
ELK1	0.756902	5.91918e-09
MANF	0.777859	5.95618e-09
PLD5	1.83376	5.95618e-09
NEK3	-1.25525	5.99485e-09
CLCA4	3.59117	6.0007e-09
ELOVL2	2.34896	6.09817e-09
LOC91450	-1.68278	6.10083e-09
RGL3	-1.2656	6.13342e-09
IRX2	-1.03174	6.16032e-09
SYNPO2	1.34232	6.27019e-09
GRASP	-1.29318	6.28041e-09
FRMD3	-1.11038	6.33834e-09
SLC4A11	1.88141	6.38865e-09
PCYOX1	-0.83095	6.50036e-09
SERPINH1	1.08587	6.50925e-09
KLRC3	-2.10871	6.54829e-09
SLC16A11	-1.16655	6.57372e-09
APOA5	-2.70554	6.59692e-09
KIF7	0.877339	6.59692e-09
TMSB4X	-0.717677	6.61201e-09
LDOC1	0.763762	6.67216e-09
KIAA1328	-0.756523	6.74505e-09
PLIN3	0.684921	6.81452e-09
C11orf54	-0.680479	6.8385e-09
CD47	-0.64777	6.86124e-09
FGD3	-0.7609	6.96095e-09
PDIA6	0.917574	6.9672e-09
CEACAM19	-1.56932	6.982e-09
SFTA2	-1.18296	7.0022e-09
LINC00162	-2.31183	7.01091e-09
POPDC3	-1.99872	7.10721e-09
PLEKHH2	-1.14909	7.1308e-09
MS4A6E	2.15498	7.37601e-09
SMOC2	1.32734	7.42549e-09
ENTPD7	0.979144	7.43967e-09
EPHA3	1.49917	7.50097e-09
CD55	-0.913406	7.5094e-09
GJB5	2.67488	7.54286e-09
NOD1	-0.760797	7.54606e-09
FAM196A	1.97097	7.5479e-09
LOC100128714	-4.77273	7.57266e-09
DFNA5	1.16595	7.59065e-09
KRT6B	4.68795	7.59065e-09
GLI2	0.993312	7.65077e-09
UGT1A4	3.96888	7.65077e-09
IER2	-1.36437	7.68816e-09
EPS8L2	-0.77025	7.699e-09
PCSK7	0.77215	7.72628e-09
FLJ35282	-1.90462	7.7404e-09
KIAA1644	2.07937	7.75412e-09
ZNF215	2.0013	7.93141e-09
SLC44A2	-0.583751	8.06524e-09
CLIC6	1.43984	8.12119e-09
ANKRD35	1.14509	8.21884e-09
RRBP1	0.734533	8.31167e-09
BTN3A1	-0.753816	8.33937e-09
ODAM	-1.82054	8.34096e-09
RPE65	3.51135	8.41931e-09
MYOF	0.737316	8.49326e-09
VAMP5	-0.794671	8.60037e-09
PDK1	1.45666	8.61996e-09
DUSP6	-1.12519	8.78615e-09
ATP8A1	-0.922093	8.79576e-09
SLC7A1	1.0718	9.08614e-09
SYNPO2L	-1.75323	9.21665e-09
SLC35C1	0.808983	9.22367e-09
PKIA	-0.912308	9.22367e-09
INMT	-1.16015	9.22367e-09
PDLIM2	-0.756134	9.22367e-09
TGM5	2.19944	9.28061e-09
LRRFIP1	-0.602426	9.66596e-09
CLIP3	0.931408	9.73066e-09
ZNF37BP	-1.0322	9.73066e-09
TCEA3	-0.769477	9.94616e-09
LRRN2	1.37154	1.02364e-08
LINC00472	-1.30959	1.04427e-08
KRT75	3.36824	1.10529e-08
BFSP2	2.45861	1.10707e-08
RGS16	-1.5412	1.11782e-08
CACNA1S	-2.54182	1.1239e-08
LOC644242	-1.62634	1.1253e-08
SCEL	-1.49518	1.13407e-08
GPSM2	0.948231	1.17702e-08
SSFA2	-0.66868	1.20446e-08
TIMP1	1.78713	1.20561e-08
LOC283683	-1.79233	1.20818e-08
QKI	-0.75713	1.21798e-08
FAM83F	2.50349	1.21798e-08
COX4I2	-1.06386	1.23126e-08
AK1	-0.764592	1.2343e-08
B4GALT2	0.80753	1.2343e-08
PEBP4	-1.34768	1.2546e-08
PNLIPRP3	5.68447	1.32569e-08
HAMP	2.39393	1.33747e-08
CCT3	0.633122	1.33797e-08
GAB3	-0.757811	1.3543e-08
CXorf1	-3.24269	1.35883e-08
ROBO4	-1.13988	1.37682e-08
NKX1-2	4.64638	1.39522e-08
VTCN1	2.72311	1.41198e-08
CCDC3	1.19661	1.43233e-08
NRN1	-0.868643	1.43342e-08
KCND3	1.89371	1.46961e-08
TRAM2	0.826757	1.47208e-08
SLITRK2	-1.98972	1.5151e-08
MAP2	-1.05087	1.52117e-08
KANSL3	-0.668165	1.52769e-08
ACR	-1.46004	1.55326e-08
IGFBP7	0.908903	1.56144e-08
ABCA10	-1.47028	1.58787e-08
SYT8	2.09726	1.59356e-08
RABGAP1L	-0.734183	1.62868e-08
SAPCD2	1.17367	1.63504e-08
MMP16	1.98721	1.64104e-08
CNKSR2	-1.18165	1.64595e-08
LEF1	0.870844	1.6812e-08
MUC13	3.50598	1.69091e-08
GPR17	-2.01029	1.72523e-08
ORAI2	0.76147	1.74535e-08
TRPS1	0.776219	1.74642e-08
CITED2	-0.837034	1.77219e-08
CKMT1B	2.56435	1.78661e-08
C19orf59	-1.74301	1.7906e-08
VAMP4	-0.638757	1.80768e-08
CASZ1	-0.823727	1.84524e-08
MASP2	-1.22504	1.88155e-08
A2M	1.00486	1.93379e-08
PRTG	-1.3467	1.94707e-08
CHRNA2	-2.3287	1.96665e-08
THSD1	-1.13219	2.01176e-08
CHPT1	-0.643329	2.01176e-08
VIPR1	-2.14057	2.01282e-08
NLN	0.78939	2.01828e-08
CDO1	-1.09967	2.01886e-08
CD58	-0.76037	2.0253e-08
NPM3	0.913348	2.0253e-08
STARD5	0.850656	2.09522e-08
ATHL1	-1.60895	2.12656e-08
QDPR	-0.644295	2.14965e-08
GLYATL2	3.37645	2.16236e-08
MIR4530	-2.32859	2.16352e-08
ANGEL2	-0.67525	2.18292e-08
HTRA1	0.867142	2.18672e-08
CLDN11	-0.969853	2.19904e-08
GDPD3	-1.72973	2.19904e-08
HSPG2	1.04725	2.22476e-08
LOC100505495	-0.991443	2.23088e-08
CAMP	-1.82156	2.25886e-08
CSRNP1	-1.48928	2.26121e-08
ADAM1	-1.05826	2.27123e-08
OXCT1	0.646491	2.27379e-08
PSCA	3.76718	2.27379e-08
CDKN2B	-1.10974	2.29248e-08
DPEP1	2.97499	2.3054e-08
SLC35A1	-0.635789	2.3054e-08
TSPAN32	-1.33672	2.31282e-08
KRT72	-2.97336	2.32206e-08
ITGAV	0.809493	2.32978e-08
FOXA2	-0.970794	2.33112e-08
BDKRB2	1.56712	2.33428e-08
ZNF662	-1.03179	2.35474e-08
ENAH	0.695583	2.35685e-08
TUFT1	-0.844393	2.35685e-08
LOC100506585	-1.17499	2.35685e-08
SEC14L2	0.967928	2.36535e-08
C10orf67	-1.54706	2.38661e-08
SV2A	1.12617	2.39364e-08
EPAS1	-1.08096	2.4452e-08
RPLP0	0.635849	2.45797e-08
VIP	-2.08857	2.47986e-08
TCF7L2	-0.728825	2.48809e-08
MIR126	-1.97309	2.51265e-08
MEF2B	2.61145	2.51265e-08
ECSCR	-0.832613	2.53779e-08
CD247	-1.01457	2.54868e-08
SHC1	0.673672	2.54868e-08
UBFD1	0.499184	2.67994e-08
FBXW4	-0.511209	2.7107e-08
PHACTR2	-0.670349	2.77e-08
ADHFE1	-1.11821	2.77752e-08
ARHGEF4	-1.23397	2.77752e-08
RGS9	-1.58405	2.78163e-08
CRELD2	0.745292	2.7828e-08
VWCE	1.47875	2.80419e-08
MFGE8	0.870932	2.81002e-08
GCNT2	-0.688317	2.89844e-08
SLC19A1	-0.904471	2.9437e-08
SPRR2D	3.56519	2.94778e-08
TRPC2	-1.66452	2.98388e-08
CD79A	2.45964	3.04148e-08
ALDH2	-0.730078	3.04148e-08
LOC100507127	2.43119	3.08783e-08
MYO7A	0.993003	3.10162e-08
CCDC84	-1.46959	3.12483e-08
TMEM178	-1.38795	3.13185e-08
CA3	1.63516	3.15844e-08
PRUNE2	1.43779	3.18184e-08
MYO1D	0.795705	3.21652e-08
CACNA2D3	-1.1685	3.30365e-08
LUM	1.13859	3.31382e-08
PGAP2	-0.683717	3.37394e-08
DIO3	1.68146	3.37394e-08
DNAJC12	1.54126	3.37721e-08
LOC100506497	-1.75563	3.38643e-08
ADRA1A	-2.02822	3.49154e-08
TOX3	1.52398	3.49154e-08
SLC24A2	2.08242	3.5731e-08
CD36	-1.06297	3.58448e-08
SMA4	-1.02463	3.58448e-08
MTMR9LP	-1.18091	3.63291e-08
SHE	-0.71203	3.63291e-08
NFKBIA	-1.19835	3.63291e-08
SOWAHC	-0.717705	3.66611e-08
KIF12	-1.47843	3.68464e-08
LMO2	-0.786708	3.6866e-08
NPNT	-0.82952	3.7461e-08
FAM111A	-0.944072	3.7546e-08
CAT	-0.82232	3.75885e-08
HEATR5B	-0.610494	3.76209e-08
FAM155B	2.07173	3.78802e-08
LOC100268168	-1.12784	3.78802e-08
AAA1	4.52277	3.78802e-08
PVT1	1.24123	3.80614e-08
ITGBL1	1.55206	3.8135e-08
ACSF2	-0.780699	3.95678e-08
FAM122C	-0.848486	3.95678e-08
HMCN1	1.14078	4.00034e-08
DNM1	1.11193	4.06364e-08
SLC36A1	0.857392	4.06364e-08
C1orf140	-1.78175	4.08106e-08
SOX17	-1.24505	4.16835e-08
ARHGEF2	-0.843867	4.18089e-08
CASP1	-0.744516	4.22073e-08
CACNA2D2	-1.15667	4.25816e-08
LTF	2.88581	4.25816e-08
TG	1.3872	4.29451e-08
CD1A	1.64923	4.33866e-08
MTMR10	-0.586141	4.38918e-08
CFHR3	1.32361	4.59905e-08
GPT2	1.07196	4.61161e-08
CCK	-2.78465	4.62128e-08
RHBDL2	1.26528	4.7021e-08
ZPLD1	3.81439	4.94161e-08
LOC338758	-0.896376	5.03884e-08
RAB3IL1	1.14232	5.10648e-08
TRAF7	0.646302	5.10648e-08
LOC100507050	1.41114	5.12929e-08
TWIST1	2.19857	5.20447e-08
OASL	-1.49973	5.28533e-08
CASKIN2	-1.06985	5.29348e-08
LOC100128098	-2.32719	5.30668e-08
SLC39A11	0.611924	5.31193e-08
PAM	0.565194	5.32121e-08
TRIM29	1.95469	5.33445e-08
TMC5	1.07954	5.34288e-08
PGF	1.48481	5.37051e-08
SDF2L1	0.898184	5.44151e-08
SRPK1	0.502768	5.45606e-08
B3GNT9	0.98571	5.46518e-08
SLCO5A1	1.74093	5.47867e-08
44084	-0.643943	5.48889e-08
GZMH	-1.69463	5.51355e-08
PRKD1	-0.715202	5.53119e-08
KRT6C	6.879	5.63381e-08
FMO5	-1.13344	5.64328e-08
LDLRAD3	1.62413	5.75712e-08
PPAPDC1A	2.31208	5.76679e-08
GJB3	1.75261	5.80435e-08
SLC27A3	-0.86961	5.9088e-08
MIR205HG	2.54457	6.02644e-08
SRSF5	-0.667814	6.02918e-08
HLA-F-AS1	-0.934746	6.03986e-08
PCSK1N	1.55569	6.06233e-08
NEK6	0.877573	6.08413e-08
DSC3	3.19786	6.10062e-08
GUCA2A	-2.83567	6.13967e-08
KCNS3	-0.738449	6.14147e-08
CLEC1A	-0.923035	6.1943e-08
UCK2	1.01932	6.22731e-08
XCL1	-1.54833	6.26388e-08
NRK	1.9056	6.29767e-08
MAPK4	-1.18899	6.3189e-08
PRPF3	-0.676103	6.33139e-08
SH2D1B	-1.8879	6.59052e-08
POGZ	-0.699951	6.62736e-08
UBE2T	0.96302	6.64861e-08
AFAP1L1	-0.903075	6.65904e-08
BBOX1	2.14394	6.82064e-08
CCDC54	-2.1252	6.8227e-08
C1orf106	1.03458	6.89506e-08
CCL22	1.36629	6.89831e-08
HPS5	-0.605592	6.91222e-08
DAO	-2.51298	6.93031e-08
GJB6	3.02773	6.93213e-08
RUFY3	-0.758724	6.95462e-08
NKTR	-0.985182	6.95838e-08
TAF11	-0.713449	7.07615e-08
FBLN1	1.03031	7.07659e-08
WIF1	-1.17611	7.08739e-08
EGR2	-1.57761	7.17679e-08
GOLGA8B	-1.64024	7.42946e-08
MLEC	0.534607	7.46108e-08
APCDD1	0.992104	7.50526e-08
FXYD6	-0.782357	7.67735e-08
WFS1	-0.667171	7.80427e-08
LOC100507156	-1.25837	7.82879e-08
ZFP28	-0.735008	8.0678e-08
CETP	-1.27083	8.23265e-08
UCHL1	1.584	8.23265e-08
NKAIN4	2.07043	8.35964e-08
GDF11	0.763718	8.35964e-08
LOC100288911	-1.12627	8.3646e-08
AGBL1	-2.199	8.39862e-08
ECT2	0.69044	8.4173e-08
PRAF2	0.687338	8.48473e-08
GRB14	-1.48817	8.48969e-08
CYB5R2	-1.0097	8.50107e-08
DGKI	1.81816	8.53615e-08
INTS3	-0.688195	8.55567e-08
KIAA1024	1.18656	8.55699e-08
FBXO16	1.40708	8.64249e-08
CATSPERB	1.45331	8.65491e-08
RAMP3	-1.28677	8.65632e-08
IBA57	-0.747094	8.71276e-08
KIAA1598	-0.635519	8.80905e-08
PER2	-0.887537	8.82199e-08
PTPN5	-2.09708	9.01817e-08
CAV3	-2.03115	9.02091e-08
CORIN	1.15553	9.16985e-08
EVPL	-0.709078	9.18936e-08
PPAP2C	1.79701	9.21957e-08
LINC00482	-1.20144	9.29181e-08
PPM1D	-0.630978	9.2925e-08
TMEM41B	-0.665152	9.33554e-08
KCNG1	1.55711	9.56227e-08
SEMA6B	1.62626	9.56227e-08
RASSF7	-0.8732	9.72269e-08
HSPB7	1.34613	9.72269e-08
KIR2DL3	-2.12495	9.76813e-08
PRSS8	-0.816988	9.92181e-08
TRIM32	0.743548	9.99932e-08
LYSMD4	-0.764198	1.00561e-07
ELOVL4	1.10187	1.01028e-07
COCH	1.36467	1.03396e-07
ANKS1A	-0.657271	1.05091e-07
RASGRP2	-0.821117	1.05091e-07
B3GNT2	-0.567575	1.05523e-07
AARS	0.567905	1.06475e-07
LOC100505696	-0.943295	1.06991e-07
RANBP17	-0.962602	1.0797e-07
ECEL1	2.86198	1.10024e-07
STT3A	0.51451	1.10941e-07
INF2	-0.642675	1.1144e-07
LHCGR	1.80464	1.12471e-07
KLF11	-0.664693	1.13804e-07
CCL7	2.89408	1.14473e-07
TXNRD1	0.841829	1.15158e-07
CXXC5	0.78751	1.15511e-07
CACNA1F	-1.30273	1.15936e-07
MLIP	2.25142	1.16504e-07
PRAP1	-1.36607	1.16673e-07
SAP30	0.870459	1.17083e-07
MEP1A	1.82612	1.17083e-07
PAX6	-0.903387	1.17959e-07
SHOX2	2.22961	1.18008e-07
TSHR	1.92365	1.18456e-07
TTC39C	0.582121	1.20208e-07
ENC1	0.832317	1.2097e-07
ANKRD46	-0.672005	1.21448e-07
LEP	3.03674	1.21677e-07
HOXA4	-1.02157	1.217e-07
LRRTM4	-1.81364	1.217e-07
KLRB1	-1.16217	1.2218e-07
TCEAL2	-1.14816	1.22759e-07
TENC1	-0.662331	1.23185e-07
KLK6	3.28276	1.23958e-07
ALG3	0.711599	1.24957e-07
RAB3B	1.96495	1.25711e-07
EIF2C4	-0.628337	1.26009e-07
CD79B	1.45313	1.26417e-07
CRBN	-0.573806	1.26417e-07
PLBD2	0.97094	1.28189e-07
SFTPD	-1.11107	1.28279e-07
KRT73	-2.30665	1.29395e-07
CYMP	2.32713	1.3156e-07
NFATC4	0.730618	1.32548e-07
MYLIP	-0.658168	1.33502e-07
TMEM117	0.878731	1.33944e-07
PODXL2	1.02181	1.35863e-07
LOC100505989	2.45625	1.36945e-07
ITGAL	-1.00923	1.44251e-07
FIBIN	-1.4023	1.45696e-07
NOS1	-1.33498	1.45696e-07
ROBO3	-1.02117	1.46073e-07
CPZ	1.5625	1.48323e-07
GORASP2	0.572811	1.49646e-07
PRRX2	1.32518	1.51413e-07
SLC4A3	1.08181	1.52818e-07
SLC2A12	-0.985812	1.53185e-07
SLC27A2	1.82268	1.5462e-07
PRDM16	-0.738964	1.55106e-07
DEFB4A	3.6361	1.55892e-07
RAB27B	1.06319	1.57112e-07
SENP7	-0.763243	1.57567e-07
PKN2	-0.631076	1.5779e-07
CXCL3	-1.83293	1.60075e-07
RXFP2	-2.08727	1.60203e-07
NDRG2	-0.676945	1.61766e-07
FOXE1	2.69981	1.64361e-07
NAALAD2	-0.991821	1.64805e-07
SND1	0.585692	1.64826e-07
PPP1R15A	-1.05045	1.65074e-07
F13A1	1.57868	1.65375e-07
LOC100131208	1.91436	1.65696e-07
SRRM4	-2.02523	1.69166e-07
PLOD2	0.824022	1.7221e-07
IL15	-0.819118	1.75569e-07
GALNT1	0.592991	1.7701e-07
FLJ31306	-1.03902	1.7701e-07
LOC390660	-1.90841	1.7701e-07
TBC1D4	-0.722152	1.77989e-07
SAMD9L	-0.837533	1.78026e-07
PNMT	-2.03013	1.78169e-07
SIGIRR	-0.670475	1.79226e-07
SLC1A3	1.38598	1.79226e-07
BTN3A3	-0.73107	1.79741e-07
LONRF1	-0.832256	1.81043e-07
GPR133	-0.832403	1.85248e-07
PCBP3	1.29473	1.85735e-07
SLC5A5	2.78371	1.86513e-07
LOC645434	-1.75744	1.89692e-07
PRSS57	-2.18916	1.89817e-07
LRP3	0.827457	1.93348e-07
THSD7B	2.05222	1.94402e-07
DNASE1L3	-1.7834	1.9549e-07
GRIA3	1.55708	1.96226e-07
MFI2	1.11335	1.9757e-07
COLEC10	-2.3367	1.98171e-07
LOC100507217	-0.76817	2.00085e-07
SLC2A4	1.30862	2.01357e-07
COL13A1	-0.783621	2.03794e-07
C16orf45	0.652839	2.04542e-07
TNFRSF11A	1.01438	2.054e-07
ATP8B2	0.68761	2.08959e-07
MERTK	0.849006	2.09246e-07
C10orf26	0.574324	2.09569e-07
NSMCE4A	-0.638137	2.10835e-07
SH2D4B	-1.3899	2.1139e-07
ALDH3A1	1.93528	2.13967e-07
LOC283867	-1.57835	2.16526e-07
KIAA1462	-1.1089	2.16941e-07
GRHL3	1.91479	2.18297e-07
LOC439949	-0.906942	2.18973e-07
LOC730101	1.07674	2.19035e-07
GAPDH	0.709355	2.21825e-07
EPN2	-0.52308	2.22595e-07
RPN2	0.518814	2.2393e-07
RNASE13	-2.38544	2.24323e-07
GREB1	1.21	2.26113e-07
RGL2	-0.635212	2.26872e-07
MAN2C1	-0.801866	2.27157e-07
DKFZP434K028	-2.7034	2.27157e-07
WSCD2	1.53638	2.2965e-07
TRAF3	0.604965	2.29874e-07
FAM5C	1.58036	2.30828e-07
FAM102A	0.586479	2.32984e-07
RPS2	0.601517	2.3342e-07
MDK	0.926189	2.3342e-07
FOXL1	1.14609	2.34658e-07
GPRC5D	-1.5742	2.37749e-07
KREMEN1	0.904098	2.38056e-07
ECHDC2	-1.02023	2.39102e-07
AKR1C1	1.11278	2.4271e-07
GNL3	0.704138	2.44888e-07
ARHGAP1	0.609436	2.4568e-07
CCR8	1.73776	2.46664e-07
LFNG	-0.725413	2.46664e-07
LOC723809	-1.54839	2.46664e-07
GABRP	2.36354	2.49489e-07
LINC00487	-2.74126	2.49595e-07
FAM211A	-0.869719	2.50774e-07
RP11-165H20	-2.73833	2.51513e-07
PPAP2A	0.783727	2.53417e-07
LOC100129034	0.702998	2.55473e-07
WFIKKN1	-1.53074	2.5603e-07
PIP5K1B	-0.706684	2.56487e-07
ZNF682	-1.2243	2.56487e-07
DDX60L	-0.946416	2.59543e-07
CTSL1P8	-2.50999	2.62424e-07
MTTP	1.7318	2.64274e-07
MRPL3	0.55605	2.64343e-07
CYP7B1	1.53616	2.65606e-07
TBX3	-0.982483	2.66955e-07
GATA6	-0.73431	2.67144e-07
CRIPAK	-1.15123	2.67739e-07
CFLAR	-0.524592	2.68298e-07
DAP	0.611651	2.68298e-07
NUMB	-0.488782	2.68973e-07
ZNF365	-1.08064	2.69447e-07
SAMD3	-1.22434	2.72514e-07
CFB	1.33249	2.72547e-07
NRG3	-1.75278	2.7267e-07
ALG1	0.602573	2.72819e-07
PER3	-1.39756	2.74652e-07
LY6G5B	-1.08978	2.7868e-07
GPR115	1.92543	2.79243e-07
CDKN2C	0.794756	2.80376e-07
TMEM91	-0.939447	2.8356e-07
AVEN	0.713689	2.85086e-07
COL11A2	-1.00569	2.85876e-07
REP15	-0.99851	2.88214e-07
IGFL3	4.79376	2.89743e-07
LOC100507421	1.26857	2.92002e-07
CHRM1	-2.227	2.95896e-07
GYG2	1.32947	2.96022e-07
DDIT4	1.3763	2.98242e-07
F5	1.44285	2.98545e-07
PDXP	0.754773	2.98584e-07
TARP	-1.34696	2.98673e-07
APOA1	-1.54185	2.98673e-07
ZNF83	-0.935194	2.98673e-07
STARD8	-0.859148	3.0076e-07
TXNDC5	1.82602	3.01096e-07
HES2	1.36196	3.01731e-07
XPR1	0.56571	3.01731e-07
IL1A	-2.00277	3.13394e-07
GMFG	-0.769799	3.13394e-07
CARM1	0.522858	3.14225e-07
SLC7A5	1.76071	3.14772e-07
ZNF589	-0.801201	3.14772e-07
RASD2	1.30825	3.18195e-07
PDE7B	1.01906	3.22692e-07
KCNMB1	1.14946	3.30165e-07
SPATS2	0.707021	3.31653e-07
NHEG1	-4.52588	3.32505e-07
DNAJB9	0.699188	3.32515e-07
PAK4	-0.729724	3.33168e-07
COL4A4	-1.07802	3.34801e-07
KIAA0087	-1.63417	3.36515e-07
LOC100128071	-1.30023	3.37544e-07
NEURL1B	0.914414	3.37552e-07
ACSBG2	-1.16534	3.37974e-07
DPAGT1	0.495679	3.38024e-07
SERPINA10	-1.88318	3.41166e-07
RAPGEF3	-0.929467	3.42973e-07
ADCY2	1.3239	3.43273e-07
CACNA1E	2.05859	3.4474e-07
ZNF577	-0.955749	3.50858e-07
AMICA1	-1.1591	3.56743e-07
C2orf72	-1.33044	3.58466e-07
TNFRSF13C	2.24843	3.59789e-07
TNNT1	-2.285	3.7522e-07
DNAJB3	3.27303	3.79726e-07
AQP5	1.57893	3.80826e-07
MIXL1	2.53983	3.89514e-07
PRAM1	-1.33002	4.01084e-07
COL24A1	1.05394	4.01911e-07
PECAM1	-0.648523	4.01911e-07
TPRG1	-0.901212	4.0389e-07
ARC	-1.9012	4.14138e-07
LINGO1	1.58078	4.17349e-07
LOC284454	-1.75767	4.17598e-07
TSSK3	-0.913009	4.20602e-07
GPD1	-1.68193	4.2797e-07
CLEC4F	-1.71358	4.30112e-07
ATG16L2	-0.942089	4.41232e-07
CALCR	-1.47989	4.45557e-07
GRID2	-3.15126	4.46329e-07
CYP4V2	-0.580072	4.46418e-07
GAL3ST4	0.904563	4.47394e-07
SPATA13	-0.546808	4.47394e-07
KAT2B	-0.55063	4.47394e-07
GABBR1	-1.04866	4.49732e-07
IPO4	0.788419	4.52554e-07
FCGBP	1.6251	4.53328e-07
MUC21	1.7075	4.57457e-07
PPFIBP1	-0.757766	4.57561e-07
MCM4	0.615057	4.70923e-07
F2RL1	0.79766	4.70923e-07
DLL4	-1.03052	4.75698e-07
LMNB2	0.677439	4.8143e-07
HTR2B	1.66786	4.81796e-07
SGK1	-0.820676	4.82301e-07
HCAR1	2.40697	4.87797e-07
NTRK1	1.09702	4.88007e-07
FAM193B	-0.937601	4.89886e-07
METTL8	0.553472	4.93374e-07
CPA3	1.12712	4.98347e-07
FAM71A	-4.44361	4.98503e-07
MYO1C	-0.63	5.0242e-07
NOTCH3	0.865894	5.0242e-07
CALML3	3.40095	5.0263e-07
TGFBI	0.893574	5.03618e-07
PSD3	0.772888	5.10602e-07
ZNF655	-0.536262	5.11544e-07
EPN3	2.07787	5.14223e-07
C4orf38	-1.21719	5.15365e-07
CIRBP	-0.609488	5.16461e-07
TTR	2.96586	5.35298e-07
MND1	1.2071	5.35425e-07
LOC100506472	-1.00005	5.36606e-07
PPIC	0.582408	5.41004e-07
ST3GAL6	-0.955722	5.43081e-07
IDE	0.53019	5.46746e-07
LOC100130899	1.92822	5.47288e-07
TM4SF19	1.98994	5.47638e-07
GRPEL2	-0.852621	5.50258e-07
EZH1	-0.506696	5.50655e-07
SMPDL3A	0.848709	5.51475e-07
CYP2F1	2.43574	5.52975e-07
RPP40	0.803174	5.64111e-07
GPBAR1	-1.03238	5.68155e-07
KCNT2	-0.861254	5.69996e-07
FGF17	-1.98562	5.70004e-07
GPRIN1	0.989517	5.76283e-07
ATP8B4	0.809884	5.76283e-07
KIAA1755	1.08724	5.76607e-07
ZNF337	-0.859839	5.79977e-07
CKMT1A	1.95884	5.81829e-07
PVRL4	0.980882	5.82541e-07
FAM126B	-0.594878	5.85209e-07
GJC2	-0.969821	5.86305e-07
AQP4	-1.15125	5.86853e-07
ZNF493	-0.958235	5.8752e-07
ZDHHC14	-0.681923	5.8752e-07
TOM1L2	-0.516664	5.92029e-07
HS3ST1	1.1856	6.02702e-07
TMSB15A	-1.87097	6.02702e-07
DHRS9	1.48012	6.03744e-07
SLAMF7	1.41442	6.0377e-07
LY6D	5.00988	6.05262e-07
ODZ3	1.63456	6.05262e-07
IFI16	0.780102	6.08244e-07
MYBPC2	1.73191	6.11234e-07
MID1IP1	-0.639058	6.14136e-07
ICAM5	-0.941699	6.17034e-07
SMAD9	-0.833711	6.17034e-07
HMGCS2	-3.43327	6.17034e-07
LOC100131564	-0.966336	6.18361e-07
ACTA2	1.2004	6.22725e-07
WBSCR17	1.1062	6.24107e-07
RHBDL3	1.21114	6.28686e-07
LOC100506385	1.25829	6.30326e-07
LOC100287314	1.60763	6.30326e-07
MYOZ1	-1.07004	6.30789e-07
PIK3R2	0.583958	6.37984e-07
PKM2	0.685605	6.40025e-07
HSPA4	0.568057	6.40025e-07
C15orf52	-0.730429	6.42066e-07
LOC100287814	2.29168	6.52011e-07
CYP3A7	-1.76829	6.58547e-07
ADAMTS9	1.60451	6.61934e-07
TNNT2	-1.43483	6.8255e-07
LINC00092	-1.0789	6.90432e-07
ARHGEF6	-0.648725	6.93259e-07
SGPL1	0.487137	6.93259e-07
ST7-AS1	-0.993605	7.02772e-07
STIL	0.897397	7.07612e-07
COL4A1	1.19044	7.09822e-07
LOC441204	-1.17593	7.32137e-07
PTK7	0.645924	7.34038e-07
C10orf2	0.942123	7.35985e-07
PKIB	1.43999	7.35985e-07
S100P	1.69326	7.46425e-07
LINC00310	-1.24055	7.47185e-07
VARS	0.661201	7.49632e-07
SIL1	0.579449	7.55078e-07
RILP	-0.648677	7.56051e-07
LOC100507589	-1.08169	7.56141e-07
TNFRSF11B	1.96874	7.62064e-07
TMEM50B	-0.541106	7.70844e-07
SH3GL1	0.616459	7.71199e-07
AGPAT5	0.571721	7.71199e-07
SLC10A6	1.45087	7.73947e-07
PXMP4	-0.715627	7.78265e-07
C14orf43	-0.613702	7.87063e-07
GLT8D2	0.753284	7.89042e-07
STAC2	2.08439	7.90089e-07
LNX2	-0.620897	7.90089e-07
LIM2	-2.83477	7.99495e-07
AMY2B	-1.1372	8.00356e-07
DUSP1	-1.13226	8.00536e-07
RIMS2	1.97092	8.05531e-07
VWA5A	0.601498	8.06572e-07
GPR158	-2.20975	8.06648e-07
TMED3	0.637529	8.08571e-07
LOC100144604	-1.61858	8.0864e-07
KIAA0408	-1.75618	8.12973e-07
RDX	-0.703841	8.14015e-07
PTPRR	-1.55	8.17147e-07
ADCY7	-0.662782	8.18226e-07
LMOD1	1.07622	8.24078e-07
GCFC1-AS1	-0.738942	8.37157e-07
LILRB5	1.00525	8.42636e-07
FOLR2	1.02829	8.44949e-07
TPSAB1	1.04392	8.45245e-07
HLF	-1.03839	8.51514e-07
TSPAN4	-0.657419	8.58705e-07
ADIPOQ	4.45615	8.6188e-07
BGN	1.03115	8.62802e-07
SHC2	-0.938719	8.70315e-07
S100A10	-0.832395	8.72625e-07
SOD3	0.777623	8.73865e-07
LRRC4C	1.31491	8.81578e-07
TAF1C	-0.844666	8.92001e-07
RUNX2	0.805506	8.92001e-07
COL4A6	1.1008	8.98226e-07
CALCRL	-1.12178	8.98226e-07
ATP1A4	1.57824	8.98785e-07
LPAR1	0.920668	9.05756e-07
BPIFA2	2.43666	9.08532e-07
GABARAPL1	-0.536267	9.12226e-07
CLDN24	-1.88644	9.12226e-07
ERN2	2.7037	9.20459e-07
HULC	-2.51161	9.52728e-07
DSCAM	-2.22536	9.64098e-07
MIR3671	-1.15933	9.65026e-07
WDR3	0.597969	9.65299e-07
IRAK1	0.644984	9.74024e-07
KLHL13	1.41571	9.84579e-07
ZNF75A	-0.734024	9.8874e-07
TMED2	0.453093	9.89386e-07
PLA2G4F	-1.31182	9.93737e-07
A2MP1	-1.437	9.95459e-07
PBOV1	-1.626	9.98364e-07
MIR650	3.3261	9.98738e-07
LOC100507577	-0.995794	9.98738e-07
SYN3	-1.20512	1.00139e-06
THSD1P1	-0.828958	1.00529e-06
SPINK1	2.17931	1.00804e-06
KANK4	-1.4112	1.00911e-06
ID4	-0.986389	1.01242e-06
ID1	-1.08862	1.01242e-06
USP12	-0.520277	1.02279e-06
CCDC129	1.7626	1.02475e-06
MYLK	0.965962	1.02868e-06
CPD	0.783299	1.0455e-06
CDH12	-1.5548	1.07221e-06
GALT	-0.577511	1.09372e-06
ACACB	-0.714234	1.09557e-06
SURF4	0.601444	1.09557e-06
HELLS	0.78601	1.11001e-06
RAI1	0.539617	1.11915e-06
FAM198B	1.03998	1.12091e-06
CCDC80	1.77876	1.12131e-06
CYP1A1	5.38924	1.12384e-06
MBL1P	-1.56442	1.12536e-06
CD300LG	-1.68391	1.12743e-06
SULT2B1	-1.2171	1.12743e-06
LILRB4	1.18446	1.12981e-06
MAPK3	-0.481117	1.13261e-06
PLAU	1.15511	1.13541e-06
C8orf75	2.64756	1.14304e-06
ABCA9	-1.01216	1.16043e-06
ITM2B	-0.518789	1.17379e-06
SLC39A14	1.27685	1.18605e-06
STK32A	1.1126	1.19111e-06
SLC29A4	1.0305	1.20389e-06
RBM17	-0.570256	1.2052e-06
NTNG1	-1.20492	1.21022e-06
MIR29C	-1.38087	1.23895e-06
FRMD6	0.890504	1.24361e-06
TLN2	0.727648	1.24818e-06
BCL6B	-0.874187	1.24892e-06
CD27	1.57542	1.24892e-06
ADORA3	1.32838	1.25444e-06
TNNC2	-1.18304	1.26675e-06
SPN	-1.0011	1.269e-06
KL	-1.26838	1.27048e-06
MUC5B	2.93889	1.27048e-06
DNAH17	-0.834343	1.27677e-06
EDA	-0.901188	1.28055e-06
PDE3A	1.01386	1.29223e-06
GSTM2	-0.997998	1.29354e-06
FGFR4	-0.825202	1.30844e-06
LOC100130417	1.17583	1.31064e-06
TP53BP1	0.543644	1.32104e-06
SPRR3	7.26805	1.32592e-06
ENOSF1	-0.824819	1.32681e-06
MGAT5B	-1.45347	1.33034e-06
TXK	-1.08875	1.33034e-06
FRA10AC1	-0.723493	1.33908e-06
C6orf222	2.36706	1.3601e-06
CARHSP1	-0.545015	1.36369e-06
GIMAP6	-0.788592	1.36463e-06
CD101	-1.37117	1.38209e-06
DMRTA2	2.41508	1.38509e-06
SYT16	2.62955	1.38509e-06
CDT1	0.967826	1.38732e-06
GSG1L	-1.99297	1.38754e-06
TM9SF1	0.487452	1.39286e-06
S100B	1.19323	1.40501e-06
RPGRIP1	-1.05878	1.4115e-06
SECISBP2	-0.458341	1.4115e-06
TSPAN18	-0.866293	1.44247e-06
DMTF1	-0.638565	1.4557e-06
ARHGAP44	-0.554215	1.46026e-06
FAM43B	2.09671	1.46402e-06
GIMAP7	-0.715732	1.47719e-06
AKR1E2	-0.957807	1.48318e-06
LOC100507055	-1.23023	1.48341e-06
ANGPTL2	0.98542	1.50162e-06
HN1L	0.792604	1.5088e-06
NPHP3	-1.00989	1.51665e-06
TMEM214	0.478906	1.53827e-06
PTGR1	0.645039	1.53845e-06
TYMS	0.893466	1.5443e-06
ASCC3	0.625555	1.54789e-06
LOC143666	-0.993289	1.5617e-06
IGSF9	1.60586	1.5617e-06
IGLL1	2.17992	1.56388e-06
RHOD	0.768571	1.56388e-06
ABCC13	-1.93762	1.56459e-06
C12orf39	-1.72297	1.56459e-06
NPR3	-1.22907	1.56493e-06
FXYD1	-0.726355	1.56566e-06
ITGA10	-1.00963	1.56877e-06
PAN3	-0.691236	1.57267e-06
FOXF1	-1.07697	1.57834e-06
PCP2	-1.67304	1.57834e-06
VEPH1	-1.0376	1.58384e-06
WNK2	1.841	1.60129e-06
GUCA1A	3.12359	1.60182e-06
ATP12A	2.89278	1.60201e-06
CHML	-0.657061	1.60314e-06
SECISBP2L	-0.669071	1.60758e-06
CHRM3	-0.954193	1.60931e-06
LRRC2	-1.37611	1.61787e-06
KDELR2	0.480233	1.61821e-06
CALCOCO1	-0.483783	1.6202e-06
FABP4	-1.55095	1.64707e-06
FRAS1	-0.962858	1.67683e-06
TNFSF11	1.60273	1.67831e-06
HHLA2	1.92177	1.68814e-06
FAM107A	-1.4758	1.69444e-06
GTF2H2B	-0.780856	1.69444e-06
ERG	-0.728078	1.69444e-06
KIAA1274	-0.828091	1.70758e-06
CYP4A11	-1.44775	1.72497e-06
BLK	1.82453	1.73006e-06
OGDHL	2.00127	1.73006e-06
CLEC12B	-1.50674	1.74815e-06
AFAP1	0.714188	1.75754e-06
INADL	-0.566226	1.76288e-06
UGDH	0.726905	1.77011e-06
BEND7	-0.683648	1.78305e-06
DQX1	1.7469	1.78354e-06
FGF9	-1.43095	1.79152e-06
HS3ST2	1.30048	1.79152e-06
SLC22A3	-0.945367	1.79257e-06
FAM211B	-0.958234	1.80473e-06
NAV3	1.0681	1.80473e-06
PPP1R14B	0.717655	1.80866e-06
KRT80	1.32674	1.81035e-06
POLR1A	0.780717	1.81181e-06
KLK5	-4.35691	1.82353e-06
LRFN5	1.22171	1.83535e-06
FHOD1	-0.639312	1.83542e-06
KLRC2	-1.76746	1.84603e-06
C8orf80	1.31251	1.85226e-06
GPR110	1.5543	1.85464e-06
MAGI3	-0.710904	1.8719e-06
COPG1	0.447363	1.8888e-06
SERPINB13	4.02637	1.89207e-06
ZNF471	-0.804679	1.89845e-06
PRPSAP1	-0.571863	1.91685e-06
ANKH	0.579627	1.92199e-06
CTSB	0.883927	1.94312e-06
MFSD8	-0.560143	1.94767e-06
FMOD	0.85066	1.94767e-06
PDE7A	-0.771558	1.95522e-06
KDELC1	0.88286	1.96765e-06
PDIA3	0.450814	1.97297e-06
ARF4	0.493353	1.98591e-06
L1TD1	-1.17756	1.98737e-06
LOC100302401	-1.00902	2.00179e-06
MEI1	1.10324	2.01814e-06
HSPB6	0.8955	2.02512e-06
TREM1	-1.23221	2.03254e-06
PLVAP	1.37667	2.05447e-06
USP44	-0.980623	2.07284e-06
LRRC15	1.88431	2.07836e-06
IMPG1	-1.13975	2.08772e-06
SSR3	0.518823	2.11333e-06
CELSR2	0.955513	2.11333e-06
SPON2	0.897308	2.12146e-06
AJUBA	-0.722528	2.12532e-06
TMC7	-0.924744	2.14408e-06
DIRAS1	1.74485	2.15437e-06
GOLGA8A	-1.63963	2.16609e-06
AIM2	1.29578	2.17122e-06
GNAL	0.986972	2.1881e-06
NRN1L	-1.51613	2.21461e-06
STX3	-0.557286	2.22523e-06
LOC100129550	-0.623464	2.23133e-06
SNX24	-0.564563	2.2838e-06
MBTD1	-0.645647	2.32307e-06
TMEM182	0.756002	2.32873e-06
PRR7	1.28936	2.33603e-06
CCDC165	0.691401	2.33654e-06
ACVR1	0.519116	2.34904e-06
ADAMTS7	-0.866406	2.34906e-06
NLRP1	-0.644219	2.36518e-06
GPR37	1.26615	2.37321e-06
DARC	1.44569	2.38319e-06
FNDC1	1.96021	2.38859e-06
SLC9B2	0.947471	2.38859e-06
FIGLA	-3.22968	2.39977e-06
ASB11	-1.52506	2.40862e-06
RPL39L	0.798386	2.40862e-06
MS4A7	-0.877541	2.41288e-06
FIG4	-0.576404	2.41375e-06
CNTN3	1.12849	2.42068e-06
NPFF	-1.63259	2.42343e-06
EXD3	-0.917394	2.44534e-06
SIX2	2.23471	2.46984e-06
ARL6IP6	-0.49375	2.46989e-06
CD52	-1.01321	2.47189e-06
MRS2P2	-1.84808	2.47537e-06
RNF38	-0.510035	2.47537e-06
B4GALNT1	1.12955	2.48847e-06
SLC35E4	0.941302	2.48847e-06
KIF20A	1.20012	2.48849e-06
IARS	0.489857	2.49414e-06
INPP1	-0.599036	2.49732e-06
ABL1	0.745672	2.50083e-06
FCRLA	2.16098	2.51107e-06
NCAPH	1.03958	2.51385e-06
LOC100506013	2.60922	2.51557e-06
MINK1	-0.578347	2.51812e-06
LGMN	0.725957	2.52096e-06
BDH1	1.10125	2.53251e-06
MPP5	-0.544328	2.61297e-06
OLR1	-1.42267	2.6141e-06
METTL7B	1.24638	2.62512e-06
EDARADD	0.873447	2.62929e-06
VDR	0.751903	2.63632e-06
EML1	-0.707163	2.67854e-06
NLGN2	0.754028	2.69074e-06
CMTM7	0.571943	2.69452e-06
MXRA8	0.783567	2.69511e-06
APOD	1.20728	2.71397e-06
ANKRD36BP2	2.01602	2.75718e-06
SERPINB3	4.13511	2.77296e-06
ABCB6	0.691162	2.77416e-06
CSAD	-1.03811	2.77741e-06
CCNL1	-0.937838	2.79743e-06
ZNF559	-0.700924	2.79743e-06
CCBE1	-1.0168	2.81797e-06
CRLS1	-0.567417	2.88618e-06
FAM159B	3.00483	2.89913e-06
MLXIPL	-1.34	2.90265e-06
TTC9	0.654624	2.91731e-06
GOLGA3	0.412263	2.91731e-06
KLK13	1.91256	2.92693e-06
CDH13	-1.03949	2.95865e-06
HOMER1	-0.842736	2.9757e-06
GJB4	2.38293	2.98734e-06
JAM2	-0.728774	2.99764e-06
FAM22D	-0.872256	3.0018e-06
LOC643669	-1.55032	3.00564e-06
ARHGEF3	-0.598707	3.01046e-06
ZNF703	1.09884	3.0276e-06
ZNF596	-0.962942	3.03627e-06
DOLPP1	0.563883	3.03627e-06
ASPHD2	0.821924	3.05288e-06
CTDSPL	-0.54624	3.07715e-06
GPER	-1.31881	3.09289e-06
PITPNM1	0.776688	3.10774e-06
GPR116	-0.693602	3.10794e-06
MACF1	-0.702523	3.10794e-06
LGI3	-1.2378	3.13382e-06
LOC100132891	0.999702	3.14266e-06
SCN1A	-1.41712	3.16439e-06
KLKB1	-1.70056	3.16725e-06
SYN2	-1.26233	3.19247e-06
AIFM2	0.573859	3.20705e-06
AMH	-1.52939	3.23469e-06
GALNTL4	-0.58958	3.23582e-06
SMPX	1.93875	3.23582e-06
TOMM34	0.692646	3.2528e-06
NTN4	-0.621986	3.27139e-06
MIR3687	1.7247	3.31775e-06
TLL2	1.41608	3.33825e-06
E2F3	0.693542	3.33825e-06
WASH2P	-0.850073	3.3432e-06
TMEM97	-0.689171	3.34986e-06
LOC644714	-0.980932	3.36759e-06
TMEM177	0.704546	3.36759e-06
CDK2AP1	0.487209	3.37372e-06
PTGER1	1.41529	3.39533e-06
SLC38A8	3.36436	3.445e-06
FAM116A	-0.471556	3.46731e-06
KLHDC1	-0.867584	3.48285e-06
ADCY5	1.00318	3.4848e-06
CHRNA5	1.02391	3.4975e-06
DBN1	0.69989	3.49988e-06
ZC3H12C	-0.633507	3.50396e-06
CST1	5.02641	3.50396e-06
GTF2IRD2B	-0.935873	3.5057e-06
CEACAM6	0.825194	3.57525e-06
ITLN1	-4.2108	3.58491e-06
N4BP2L2	-0.603105	3.58608e-06
NOB1	0.53845	3.58608e-06
AMTN	3.85934	3.62705e-06
FOXI2	1.50197	3.62854e-06
COL16A1	0.827547	3.63305e-06
KPNA2	0.807577	3.64439e-06
STARD3	-0.551115	3.64914e-06
NANS	0.589863	3.66148e-06
[truncated: 6,843 more rows]

## Sheet: GSE124685 diffEXP
Gene	logFC	logCPM	PValue	FDR
COL3A1	3.51869	6.10112	7.76733e-64	1.10638e-59
ISLR	3.78833	1.96434	2.86968e-58	2.04378e-54
S100A12	-3.21146	3.66922	4.37367e-56	2.07662e-52
COL1A1	4.13022	6.4739	1.64717e-52	5.86557e-49
GALNT18	-1.52029	2.73755	8.33649e-52	2.3749e-48
CTHRC1	3.6936	2.31106	3.55586e-50	8.44162e-47
BTNL9	-3.43063	3.65576	2.88306e-46	5.86662e-43
MMP7	3.30057	5.59416	4.59966e-46	8.18969e-43
COL1A2	2.9093	5.39351	8.28021e-46	1.31048e-42
THY1	3.75105	3.82451	1.5118e-44	2.1534e-41
CDH3	2.50844	1.27612	1.79206e-43	2.32055e-40
ADRA1A	-2.99856	0.453344	3.81594e-43	4.52952e-40
SFRP2	3.34363	2.69534	1.2539e-42	1.37389e-39
CFH	1.82502	2.73431	1.70747e-41	1.73723e-38
P2RY1	-1.71557	1.42912	2.48579e-38	2.36051e-35
RPS6KA2	-1.27745	3.03119	4.42675e-38	3.94091e-35
S100A8	-2.23664	5.04691	5.96251e-38	4.99588e-35
ST6GALNAC3	-2.0587	2.49621	8.80716e-38	6.9694e-35
ASPN	2.50358	2.29421	5.35173e-37	4.01211e-34
CLEC4E	-2.38459	2.55153	1.3258e-36	9.44232e-34
TUBB3	3.05768	0.902438	2.95589e-36	2.00494e-33
CXCL14	3.27355	2.75708	9.89631e-36	6.40741e-33
NDRG4	-2.05159	2.09732	2.12184e-35	1.26495e-32
TGFBI	1.42155	3.92541	2.13134e-35	1.26495e-32
SNX22	-2.1862	0.960883	3.89489e-35	2.21915e-32
CPXM1	4.20083	0.752656	1.16796e-34	6.39864e-32
NOSTRIN	-1.52579	2.20569	3.64003e-34	1.92032e-31
FOLR2	2.13589	2.37922	7.15523e-34	3.63997e-31
CRABP2	2.80642	2.62465	7.83834e-34	3.84998e-31
SERPIND1	4.11569	0.814569	8.64705e-34	4.10562e-31
SLCO4A1	-2.69377	1.50484	1.12903e-33	5.18771e-31
MOXD1	2.11829	2.44813	2.83758e-33	1.26308e-30
PAMR1	2.77536	0.685704	4.78093e-33	2.06362e-30
SFRP4	3.00748	2.41282	1.12603e-32	4.71741e-30
MAP3K6	-1.1813	2.4997	2.87041e-32	1.16817e-29
ECEL1P2	-2.07509	0.663856	6.59667e-32	2.61008e-29
COL5A2	1.88476	1.91051	1.03538e-31	3.98594e-29
COL10A1	4.60708	0.414979	5.7488e-31	2.15489e-28
FAP	2.73558	0.51072	7.41548e-31	2.70836e-28
TEK	-1.38809	1.79019	1.09316e-30	3.89275e-28
VIPR1	-2.03736	4.00394	7.13978e-30	2.48046e-27
SCG5	2.38152	0.465292	8.55162e-30	2.90022e-27
PIM2	2.01913	3.75442	8.89355e-30	2.94604e-27
CD27	2.42668	1.48457	2.65004e-29	8.38827e-27
WFDC12	-2.85595	0.0790825	4.23406e-29	1.31109e-26
CHPT1	-1.03154	3.46825	8.77427e-29	2.65916e-26
GRASP	-1.5813	3.9792	1.12977e-28	3.35259e-26
NREP	2.02938	2.18387	1.4104e-28	4.09994e-26
UNC13B	-1.09383	2.18749	2.04151e-28	5.81586e-26
SLC9A3R2	-1.28546	6.10136	2.09951e-28	5.86382e-26
TYMS	1.48388	1.75574	2.77745e-28	7.60807e-26
COL2A1	3.24272	0.422554	5.45721e-28	1.45761e-25
FMO5	-2.04856	2.57078	5.52591e-28	1.45761e-25
TMEM59L	2.68726	0.662922	9.87079e-28	2.55636e-25
THBS3	2.14636	0.686982	1.03664e-27	2.63676e-25
SULF1	2.09124	1.27296	1.72481e-27	4.31022e-25
CST2	3.48681	2.09015	2.092e-27	5.13767e-25
IL18R1	-2.1821	1.45164	2.18262e-27	5.26936e-25
COMP	3.2903	2.6224	3.98657e-27	9.30896e-25
PNMT	-3.61439	0.866398	4.37121e-27	1.00425e-24
PRX	-2.11305	1.80159	4.80523e-27	1.08644e-24
SPRR1A	4.35158	0.820734	5.82273e-27	1.29592e-24
CTNNBIP1	-1.13326	2.65757	6.24898e-27	1.36939e-24
GPX3	-1.66792	6.31397	9.51569e-27	2.05366e-24
PHACTR3	-2.0768	0.305266	9.79921e-27	2.08328e-24
TMEM100	-2.11734	4.21272	1.47461e-26	3.08886e-24
MZB1	2.70032	4.14227	1.73761e-26	3.58703e-24
CLDN1	1.75118	2.75714	1.78654e-26	3.63535e-24
FAM167A	-2.08177	0.890935	2.26644e-26	4.54693e-24
ARRDC2	-1.50298	3.30171	2.64345e-26	5.22962e-24
TGFBR3	-1.40826	1.60198	4.33626e-26	8.46106e-24
GEM	1.6063	3.10884	4.78691e-26	9.21416e-24
MS4A15	-2.38881	0.951753	5.50207e-26	1.04495e-23
DENND3	-1.25854	1.98646	5.64446e-26	1.05789e-23
COL16A1	1.76494	2.14637	8.36382e-26	1.5472e-23
FCN3	-2.65036	7.12966	9.14549e-26	1.67011e-23
HIF3A	-2.61356	2.09024	9.31415e-26	1.67938e-23
ALPP	-3.07313	0.565501	1.59189e-25	2.83436e-23
HIST1H2AM	1.37926	5.09546	2.49311e-25	4.38418e-23
IGFL2	3.54668	0.763959	3.29805e-25	5.72896e-23
CLEC1B	-3.24689	0.743137	3.84922e-25	6.60582e-23
LTBP2	1.78343	2.02632	5.2134e-25	8.84044e-23
TMEM2	-1.16992	1.80727	5.76637e-25	9.66308e-23
TNNT2	-1.98025	1.60987	6.90531e-25	1.14371e-22
THBS2	2.35882	1.75644	8.83432e-25	1.44639e-22
ITGA10	-1.87764	0.404597	9.71182e-25	1.57199e-22
SLCO2A1	-1.40437	4.73311	1.81412e-24	2.87115e-22
DIO2	3.18553	0.0676852	1.95221e-24	3.05575e-22
TOX2	-1.22689	1.82998	2.06418e-24	3.19589e-22
COL5A1	2.24063	1.39202	3.50608e-24	5.36996e-22
MDK	1.50219	5.16215	5.7932e-24	8.76331e-22
SMO	2.06717	0.526808	5.84467e-24	8.76331e-22
MT1L	-1.63926	4.57945	6.2659e-24	9.29702e-22
SSC5D	2.54379	0.354496	6.70833e-24	9.85088e-22
FGR	-1.16831	3.30357	8.03356e-24	1.16361e-21
GLT8D2	1.51387	1.13112	8.08741e-24	1.16361e-21
ITGBL1	1.86998	3.61576	8.57444e-24	1.22134e-21
CXCL12	1.77333	5.61715	9.77371e-24	1.37838e-21
TBX3	-1.27793	1.89128	1.0057e-23	1.40442e-21
FZD5	-1.25001	1.40564	1.17736e-23	1.62818e-21
TUBB1	-2.65841	0.512743	1.26591e-23	1.7173e-21
LINC00162	-2.56451	0.662045	1.59744e-23	2.1466e-21
EGFL7	-1.1939	4.56427	2.14332e-23	2.85322e-21
STEAP1	1.4594	1.70563	4.49876e-23	5.93336e-21
HPCAL1	-1.19635	5.06681	1.0275e-22	1.34273e-20
SYT15	-1.26813	3.4003	1.18322e-22	1.53217e-20
CPZ	2.37382	0.93191	1.66887e-22	2.13752e-20
EPAS1	-1.54308	5.15432	1.68072e-22	2.13752e-20
ITLN2	-2.73084	1.81079	1.70739e-22	2.15222e-20
CLEC11A	1.84713	0.990428	1.74448e-22	2.17968e-20
POU2AF1	2.27332	1.4854	2.2554e-22	2.79356e-20
MFAP2	1.97419	2.83035	2.60702e-22	3.20124e-20
ARHGAP6	-1.21745	1.08679	3.11922e-22	3.79745e-20
PTGFRN	1.4641	0.92512	3.72552e-22	4.49715e-20
S100A9	-1.8564	6.8675	3.8802e-22	4.6445e-20
GFOD1	-1.35998	1.99529	3.92435e-22	4.6582e-20
FAM107A	-2.00717	3.7107	4.35043e-22	5.12129e-20
JSRP1	2.76021	0.651427	4.59246e-22	5.36188e-20
GPIHBP1	-2.22804	1.44286	4.9484e-22	5.73049e-20
CA4	-2.04755	3.74696	5.23742e-22	6.01628e-20
FHL2	1.42318	3.09648	7.71267e-22	8.78874e-20
HTRA1	1.21379	3.21085	8.51175e-22	9.62233e-20
GAS5-AS1	-1.20871	2.56578	1.00682e-21	1.12922e-19
CD300LG	-2.33506	1.37828	1.01488e-21	1.12937e-19
DUOXA1	-1.34692	4.12387	1.21163e-21	1.33786e-19
ITM2C	1.22379	4.31097	1.61397e-21	1.76841e-19
POSTN	2.29306	3.61297	1.65106e-21	1.79525e-19
PLD4	2.35917	0.375477	1.72815e-21	1.86483e-19
ARHGEF26	-1.07552	1.88595	1.84839e-21	1.97958e-19
GXYLT2	1.61419	0.900323	2.97166e-21	3.15883e-19
CCL13	2.37237	3.13115	3.25765e-21	3.43718e-19
CERCAM	1.79122	1.14596	3.29881e-21	3.45501e-19
GPR133	-1.0405	1.93075	3.64132e-21	3.74462e-19
LIMS2	-1.18584	3.79208	3.65419e-21	3.74462e-19
FAM105A	-1.57775	0.877378	4.60108e-21	4.68127e-19
TREM2	1.61577	4.97169	5.03148e-21	5.08286e-19
CRTAC1	-1.81412	2.07785	6.33227e-21	6.3519e-19
COL15A1	1.82717	1.17486	6.74377e-21	6.71736e-19
GRK5	-1.00934	3.68633	7.35177e-21	7.27213e-19
CD79A	2.52006	3.08593	7.42987e-21	7.29869e-19
MMP11	3.86829	0.78898	8.91596e-21	8.69856e-19
TMEM204	-1.61155	4.18545	9.48354e-21	9.18804e-19
MFSD2A	-1.24021	3.45467	9.54668e-21	9.18804e-19
ADIRF	-1.19075	6.53958	9.69089e-21	9.26423e-19
C6orf223	-1.61572	0.605689	9.76032e-21	9.2684e-19
UCHL1	1.64112	2.22791	1.05148e-20	9.91875e-19
ITGA2B	-2.5247	0.290344	1.07349e-20	1.00597e-18
GATA2	-1.24273	2.51373	1.40921e-20	1.31194e-18
MXRA8	1.54529	3.32243	1.66052e-20	1.53587e-18
PCP4	3.57046	0.68389	2.06754e-20	1.9e-18
PF4	-3.05049	2.82893	2.25744e-20	2.06121e-18
GAMT	1.10901	1.40711	3.11341e-20	2.78915e-18
SERPINF1	1.37324	5.19485	3.55706e-20	3.16667e-18
IGLL5	3.02627	7.67509	3.83987e-20	3.39721e-18
GP9	-2.4274	1.11398	5.16903e-20	4.54492e-18
NOVA2	-1.20501	2.54316	5.54021e-20	4.84139e-18
LRRC17	2.46938	0.25404	5.64911e-20	4.90646e-18
ENC1	1.51848	1.54228	5.8088e-20	5.01458e-18
DPYS	2.89698	0.0566151	6.11251e-20	5.24498e-18
CRYM	1.37554	1.17131	6.73558e-20	5.74501e-18
ACVRL1	-1.16244	3.62712	8.61749e-20	7.3064e-18
DOCK9	-1.14696	2.03807	8.84262e-20	7.45291e-18
TNFRSF18	1.75314	0.580082	1.13418e-19	9.50313e-18
SEMA3F	-1.08212	2.04782	1.1909e-19	9.91996e-18
TNFRSF21	1.05156	2.12396	1.58322e-19	1.31113e-17
ARG1	-3.32038	0.0479225	1.67266e-19	1.37719e-17
MCF2L	-1.2209	0.926203	1.72138e-19	1.40916e-17
PRKCE	-1.11386	2.48705	2.0263e-19	1.64929e-17
PLA2G4F	-1.54389	1.59967	2.06703e-19	1.67287e-17
FCRL5	2.77278	0.530079	2.07875e-19	1.67287e-17
STARD8	-1.13835	1.30877	2.11841e-19	1.6952e-17
MXRA5	2.21436	0.341876	2.4895e-19	1.98103e-17
TDO2	2.8331	1.30139	3.01856e-19	2.38869e-17
NFE2	-1.62001	0.384671	3.07785e-19	2.42215e-17
ADAMTS8	-1.94146	1.91429	3.17738e-19	2.47315e-17
MYRF	-1.81598	0.560837	3.20137e-19	2.47828e-17
ACR	-1.74777	0.500523	3.99863e-19	3.07873e-17
PLLP	-1.27385	3.37634	4.14659e-19	3.17549e-17
NRGN	-1.27064	3.29408	4.43227e-19	3.37611e-17
RGS18	-1.69608	0.6242	4.63746e-19	3.51361e-17
S1PR1	-1.45476	3.50359	4.82431e-19	3.63585e-17
APOBEC3C	1.1332	3.54912	5.80478e-19	4.35175e-17
TMEM176B	1.06257	4.60973	6.18191e-19	4.58621e-17
MATN3	-1.23885	1.25085	7.01525e-19	5.17747e-17
DEFA4	-3.76729	0.944347	7.41775e-19	5.42447e-17
RMST	-1.56394	0.730625	7.42608e-19	5.42447e-17
PTCHD4	2.15143	0.196139	8.21953e-19	5.97341e-17
BAAT	3.44002	-0.328462	8.90391e-19	6.40542e-17
MAOA	-1.20264	3.00666	9.29623e-19	6.65405e-17
IGF1	1.82258	2.50019	1.02955e-18	7.33248e-17
SCN7A	-1.2735	0.925078	1.0577e-18	7.49548e-17
KCNN4	1.53335	1.61387	1.18753e-18	8.33258e-17
ADRB2	-1.14981	2.54482	1.31067e-18	9.15156e-17
PADI4	-2.76238	0.338225	1.45372e-18	1.01009e-16
P4HA3	2.4292	0.0914872	1.93498e-18	1.33149e-16
LXN	1.16758	2.12977	1.9575e-18	1.34051e-16
HIST1H2BH	1.10546	4.26305	1.97505e-18	1.34606e-16
CEACAM4	-1.7678	1.01782	2.20688e-18	1.4898e-16
INMT	-1.28171	5.22609	2.9133e-18	1.94821e-16
DNM1	1.75594	0.608712	3.6627e-18	2.42658e-16
LUM	1.95134	5.9089	3.70924e-18	2.44604e-16
INMT-FAM188B	-1.11928	1.73317	3.8261e-18	2.51148e-16
MYCT1	-1.02954	1.34979	4.48211e-18	2.91521e-16
CRIP1	1.15195	6.60428	5.30617e-18	3.40456e-16
TRIM2	1.24554	1.1333	5.48985e-18	3.50661e-16
LILRB5	1.37592	1.70319	5.60373e-18	3.56337e-16
LAMP5	3.07118	-0.142574	5.70361e-18	3.61076e-16
C1orf115	-1.0794	1.58192	5.87303e-18	3.70157e-16
PODNL1	1.89089	0.360895	6.62029e-18	4.15416e-16
SLC51B	-1.95299	1.1155	7.06853e-18	4.41597e-16
RGCC	-1.16771	6.86752	7.61896e-18	4.73906e-16
TIMP3	-1.53788	5.30719	7.91765e-18	4.90344e-16
COL17A1	3.1121	0.0132589	9.82634e-18	6.00714e-16
FPR1	-1.30088	2.26889	1.12407e-17	6.84242e-16
ABCC8	-3.43313	-0.129039	1.23281e-17	7.47242e-16
FBLN2	2.03451	1.47346	1.27638e-17	7.70373e-16
TMTC1	-1.3033	0.668771	1.60816e-17	9.54443e-16
KRT17	2.92333	6.06704	1.62305e-17	9.55544e-16
TTR	4.99981	1.75793	1.62343e-17	9.55544e-16
CSNK2A3	-1.48534	3.04509	1.93669e-17	1.13523e-15
CLDN24	-1.30228	2.32845	1.9544e-17	1.14092e-15
PDLIM4	1.68924	1.4216	1.98399e-17	1.15346e-15
DEFA3	-4.19266	2.63799	2.03151e-17	1.1763e-15
GGTLC1	-2.06692	3.96817	2.10901e-17	1.21622e-15
NKD1	-1.35369	1.26284	2.15489e-17	1.23767e-15
HIST1H2AG	1.0895	5.84902	2.56478e-17	1.46718e-15
PGLYRP1	-2.83778	-0.00212674	2.58057e-17	1.4703e-15
PROM2	1.95863	1.37569	2.89622e-17	1.62688e-15
ARHGAP29	-1.01239	1.23158	3.05099e-17	1.69759e-15
STEAP2	1.19076	2.84976	3.22197e-17	1.78575e-15
RXFP1	-1.4213	0.489485	3.25576e-17	1.79748e-15
LOC158376	-1.75643	1.63945	3.44585e-17	1.89509e-15
USHBP1	-1.05068	1.10898	3.70274e-17	2.01422e-15
SPRR1B	4.18478	0.463818	3.70489e-17	2.01422e-15
LOC100288346	1.21051	2.02621	3.74817e-17	2.03e-15
B3GALNT1	-1.11258	1.71059	4.46045e-17	2.40661e-15
AJAP1	-1.74098	0.142321	4.51173e-17	2.42486e-15
SPP1	2.9659	3.54568	4.53495e-17	2.42486e-15
FPR3	1.33284	3.46895	4.54533e-17	2.42486e-15
BLNK	1.09442	1.72696	4.95274e-17	2.63235e-15
DEFA1	-4.11763	1.94066	5.14681e-17	2.72532e-15
HTRA3	1.3245	1.68691	5.37742e-17	2.82642e-15
BICC1	1.11041	1.12945	5.69238e-17	2.96731e-15
CSF3R	-1.2667	4.67247	5.70797e-17	2.96731e-15
NPR1	-1.03708	1.66354	6.02558e-17	3.12103e-15
CCDC28B	1.0334	1.35404	6.55311e-17	3.38197e-15
DAPK2	-1.35528	2.06802	1.21223e-16	6.21115e-15
PIEZO2	1.84699	0.421861	1.28429e-16	6.55678e-15
TIMP4	-1.61686	0.971906	1.35818e-16	6.90924e-15
EMP2	-1.18285	4.50259	1.44305e-16	7.31489e-15
ISM1	1.49178	0.774111	1.94704e-16	9.83464e-15
CYP4Z1	-1.24466	0.731413	1.98161e-16	9.94544e-15
CLDN5	-1.59565	1.14325	1.98294e-16	9.94544e-15
HIST1H3G	1.41837	5.30341	2.03796e-16	1.01855e-14
COL18A1	1.01712	2.79098	2.22325e-16	1.10341e-14
DMKN	2.60615	0.414293	2.58073e-16	1.27639e-14
NPR3	-1.40126	1.20975	3.23394e-16	1.58563e-14
MMP2	1.48436	5.44027	3.66127e-16	1.786e-14
F2RL3	-2.50797	2.51647	4.09433e-16	1.98366e-14
LPPR4	2.93236	-0.284346	4.11331e-16	1.9861e-14
CHI3L2	-2.15653	3.58112	4.34641e-16	2.08452e-14
EPB41L5	-1.09427	0.970728	4.62985e-16	2.2056e-14
DUOX1	-1.13818	2.76575	5.74011e-16	2.69842e-14
ESAM	-1.10654	3.61202	7.16639e-16	3.33588e-14
CCL22	2.08792	0.97394	7.65788e-16	3.54152e-14
MPP3	-1.92057	0.285524	7.68517e-16	3.54264e-14
KLF15	-1.72945	1.83993	8.74399e-16	4.0048e-14
OAF	1.23354	2.30628	8.83217e-16	4.03223e-14
FKBP11	1.02288	4.02021	1.00742e-15	4.56995e-14
NECAB1	-2.09005	-0.193944	1.16516e-15	5.26872e-14
CMTM5	-2.10908	-0.0478274	1.39882e-15	6.30532e-14
TEAD4	-1.0479	2.75823	1.47148e-15	6.59112e-14
SERTM1	-2.23815	-0.188648	1.48964e-15	6.62553e-14
TFPI	-1.01644	4.61025	1.49312e-15	6.62553e-14
HYAL2	-1.35065	4.69416	1.66173e-15	7.32807e-14
HIST1H3J	1.46175	4.6447	2.14147e-15	9.38556e-14
SDR16C5	-1.13027	2.22084	2.27416e-15	9.93656e-14
CST5	1.99775	0.226276	2.4724e-15	1.07697e-13
FAM46C	1.27935	2.03342	2.51203e-15	1.0909e-13
KCNK3	-1.24742	1.58238	2.69565e-15	1.16354e-13
CD79B	1.6221	1.06571	2.88332e-15	1.23614e-13
CTSK	1.13681	1.80125	3.1022e-15	1.32299e-13
NFKBIA	-1.05074	5.80823	3.40875e-15	1.44507e-13
TMEM158	1.34942	0.911043	3.45965e-15	1.46229e-13
TENC1	-1.03879	1.3402	3.51845e-15	1.48275e-13
SAMD11	2.41875	0.0970088	3.75417e-15	1.57742e-13
GIMAP5	-1.40069	1.6248	3.97703e-15	1.6624e-13
TMCC3	-1.0488	1.09642	4.00529e-15	1.66817e-13
KDELR3	1.21974	2.15273	4.20174e-15	1.74488e-13
REM1	1.41988	1.02347	4.43875e-15	1.83262e-13
CD38	1.2261	2.93342	5.01589e-15	2.05305e-13
APLNR	2.49328	0.427488	5.57004e-15	2.26039e-13
ADAMTS16	3.53306	-0.341023	6.33851e-15	2.55767e-13
MMP25	-1.82575	1.22195	6.46202e-15	2.60014e-13
KCNA3	1.11192	1.50341	7.35188e-15	2.94987e-13
VWF	-1.08823	1.33983	7.60904e-15	3.04447e-13
PLA1A	-1.67015	1.83062	7.89076e-15	3.14835e-13
KRT16P2	2.35575	0.433398	9.78819e-15	3.8945e-13
LAX1	1.43463	0.565191	9.9867e-15	3.96241e-13
CRLF1	1.6557	1.88451	1.00522e-14	3.97732e-13
COL14A1	1.80579	1.44688	1.03746e-14	4.09351e-13
MEG8	1.84212	2.32166	1.1566e-14	4.551e-13
GAL3ST4	1.71008	0.427113	1.2508e-14	4.88121e-13
PLTP	1.37174	4.27278	1.32659e-14	5.14876e-13
IL1R2	-2.60001	3.5035	1.45562e-14	5.63418e-13
BMF	1.06871	1.03598	1.83164e-14	7.03233e-13
KIF26B	2.00808	-0.0247449	1.88053e-14	7.20062e-13
RCAN2	2.50059	-0.195723	1.93272e-14	7.38061e-13
CD24	1.90268	2.61494	1.94008e-14	7.38889e-13
PCOLCE	1.36206	3.37384	2.55057e-14	9.6367e-13
DGKG	-1.36346	1.35389	2.70835e-14	1.02057e-12
LOXL1	1.39231	1.1879	2.7425e-14	1.03072e-12
TMEM97	-1.14254	1.14135	2.77864e-14	1.04155e-12
KLRG2	-2.09437	-0.24701	3.05728e-14	1.14299e-12
ROBO2	1.94697	0.0352892	3.09426e-14	1.15379e-12
IGJ	2.11105	6.20131	3.19759e-14	1.1892e-12
LOC729966	1.93445	0.263168	3.29328e-14	1.2216e-12
DERL3	1.71911	0.705951	3.31676e-14	1.22712e-12
EPHA3	2.34154	-0.05221	4.26242e-14	1.56077e-12
UCN3	1.97131	1.61912	4.43259e-14	1.61478e-12
KCNMB4	-1.46535	0.216736	4.64556e-14	1.68804e-12
SYN2	-1.6482	0.139353	5.21613e-14	1.89055e-12
CPXM2	1.59386	0.638853	5.26263e-14	1.90256e-12
KRT19P2	-1.3067	1.54742	5.28201e-14	1.90473e-12
ZNF331	-1.22292	2.50339	5.97965e-14	2.15086e-12
SDPR	-1.25104	4.20442	6.52959e-14	2.33825e-12
CD4	1.26453	3.41966	6.53344e-14	2.33825e-12
FZD4	-1.12381	1.52602	6.63402e-14	2.36829e-12
HIST1H3C	1.28556	5.64064	6.6731e-14	2.37575e-12
GGTLC2	-1.40111	0.800124	6.80749e-14	2.41209e-12
AFF3	-1.737	-0.0420993	6.85694e-14	2.42358e-12
GPR34	1.4525	1.97612	7.13911e-14	2.51706e-12
HLA-DPB1	1.08756	2.68375	7.52012e-14	2.64486e-12
SEMA6A	-1.40651	0.266773	8.99693e-14	3.15646e-12
LOC730101	1.41138	0.610552	9.39461e-14	3.28788e-12
MMP14	1.12171	3.81978	9.42003e-14	3.2887e-12
IP6K3	-1.64944	0.0140569	1.11965e-13	3.83384e-12
NUPR1	-1.23529	7.59514	1.28125e-13	4.37652e-12
CTH	-1.31887	0.374757	1.29126e-13	4.39321e-12
KANK3	-1.12782	0.652271	1.2923e-13	4.39321e-12
ANKRD36BP2	2.92275	-0.173751	1.36521e-13	4.63001e-12
STXBP6	-1.29719	2.55416	1.41795e-13	4.79746e-12
AGER	-1.69429	3.81114	1.77022e-13	5.96101e-12
CLEC14A	-1.04966	3.477	1.85633e-13	6.22156e-12
CCDC80	2.1336	0.0108024	1.87933e-13	6.28385e-12
P2RY10	1.61763	0.347971	2.11849e-13	7.00134e-12
GOLM1	1.25046	3.06739	2.24132e-13	7.39012e-12
MMP13	3.23337	0.0310786	2.75749e-13	9.05017e-12
EDNRB	-1.30337	3.90451	2.95997e-13	9.65885e-12
LILRA3	-1.46477	0.79136	2.9633e-13	9.65885e-12
MIXL1	2.28247	0.0537408	3.12145e-13	1.0128e-11
CST1	4.25694	-0.0441226	3.39046e-13	1.0951e-11
HGF	1.12218	1.22254	3.78553e-13	1.21444e-11
SLC29A3	1.09339	1.01648	3.83293e-13	1.22688e-11
MMP19	1.3779	1.55947	4.33267e-13	1.37756e-11
HIST1H2AJ	1.24537	4.2113	4.65718e-13	1.47415e-11
CD274	-1.29493	1.06698	4.77026e-13	1.5066e-11
ANXA3	-1.05855	4.18276	4.83207e-13	1.52274e-11
HDC	1.58777	0.293666	4.87674e-13	1.53343e-11
LOXL2	1.18871	1.08653	5.05484e-13	1.58593e-11
FUT1	-1.11376	0.621945	5.65631e-13	1.77073e-11
ANO2	-1.34792	0.391362	6.12305e-13	1.91265e-11
FCGR2B	1.09323	2.05375	6.33221e-13	1.97365e-11
VPREB3	2.78078	0.62254	6.53406e-13	2.02769e-11
HIST1H2BM	1.26682	3.88224	6.56576e-13	2.0331e-11
TNC	1.46487	1.72286	7.02589e-13	2.17086e-11
HLA-DOB	2.2296	-0.244034	7.23454e-13	2.23049e-11
CCL24	2.63718	4.88629	7.2542e-13	2.23172e-11
TP53INP1	1.0852	1.36498	7.61943e-13	2.334e-11
PDE6G	1.41163	0.58514	7.67066e-13	2.34465e-11
NUDT16	-1.32977	3.21907	7.92231e-13	2.41177e-11
CHRDL2	2.21283	0.0806319	7.92409e-13	2.41177e-11
HFE	1.02979	0.928587	8.72343e-13	2.63255e-11
ADRB1	-1.18724	1.905	1.04683e-12	3.11946e-11
GREM1	2.81339	-0.349578	1.08113e-12	3.21495e-11
ZBP1	1.78646	1.89485	1.13288e-12	3.34787e-11
ATOH8	-1.36467	0.229683	1.24306e-12	3.6583e-11
CDKN3	1.23286	1.03667	1.25891e-12	3.69731e-11
ACADL	-1.28703	1.23657	1.27761e-12	3.7312e-11
SMAD6	-1.22264	5.02574	1.50106e-12	4.35363e-11
FNDC4	1.3486	0.44228	1.5063e-12	4.35363e-11
LTB	1.59165	0.211581	1.51235e-12	4.36072e-11
HIST1H3B	1.14984	5.80384	1.63782e-12	4.70345e-11
LPHN2	-1.06027	1.47957	1.6523e-12	4.73549e-11
ZBTB16	-2.07368	4.60838	1.65904e-12	4.74525e-11
STS	2.55357	-0.377701	1.95671e-12	5.55206e-11
CXCL13	3.05967	2.26081	1.96197e-12	5.55591e-11
BMP4	1.28963	1.67311	2.11061e-12	5.91802e-11
SPAG4	1.69091	0.651654	2.39821e-12	6.71123e-11
CTSZ	1.00686	6.36422	2.42829e-12	6.78206e-11
FGFR4	-1.26572	2.43403	2.50216e-12	6.96108e-11
CSRNP1	-1.23763	2.83004	2.6228e-12	7.26833e-11
EGFL6	1.3597	1.89663	2.83135e-12	7.78568e-11
PHGDH	-1.03976	1.98962	2.89202e-12	7.93718e-11
APLN	2.25617	0.70903	3.16458e-12	8.66851e-11
ESYT3	-1.102	0.581006	3.49726e-12	9.56141e-11
CYSLTR1	1.10944	0.751517	3.54712e-12	9.67915e-11
TRIB3	-1.52353	2.02331	3.77323e-12	1.02765e-10
CYP24A1	2.5338	0.0617922	3.87029e-12	1.05007e-10
STEAP3	1.02188	1.99163	4.14178e-12	1.11946e-10
TNFRSF17	1.92494	0.00186661	4.37658e-12	1.17845e-10
CCDC141	-1.58679	0.34492	4.88991e-12	1.31171e-10
MYLIP	-1.02274	0.708935	5.12925e-12	1.37333e-10
CCL18	1.76189	7.55637	5.50197e-12	1.47036e-10
SEZ6L2	1.00032	1.00113	5.54383e-12	1.47877e-10
SLC39A8	-1.21203	4.27896	5.5859e-12	1.48721e-10
SLCO4C1	-1.09427	0.983885	6.47218e-12	1.71356e-10
LY6D	3.1415	0.593885	6.5453e-12	1.72971e-10
LINC00582	2.60646	-0.336193	6.84269e-12	1.80495e-10
HIST3H2BB	1.01105	3.52746	7.63088e-12	2.00174e-10
EGR2	1.34181	2.07053	7.92958e-12	2.07627e-10
GLT1D1	-1.69208	0.0884514	8.38548e-12	2.1836e-10
AATK	-1.05159	0.977515	8.46017e-12	2.19903e-10
CXCR1	-1.84051	-0.232215	9.69611e-12	2.51569e-10
C16orf74	1.06108	0.898115	1.0345e-11	2.6743e-10
HLA-DQA1	1.72916	4.89904	1.05463e-11	2.72141e-10
GPR87	2.28428	0.265846	1.1437e-11	2.94058e-10
HLA-DRB1	1.10491	5.52614	1.236e-11	3.16648e-10
PKNOX2	-1.04726	0.630113	1.3048e-11	3.33672e-10
FCAR	-1.74755	0.0985199	1.4415e-11	3.67311e-10
ECM2	1.36607	0.635588	1.44739e-11	3.68155e-10
GPR97	-1.94119	-0.148599	1.47071e-11	3.72091e-10
PTPRB	-1.07595	0.542813	1.48787e-11	3.75766e-10
SERPINF2	-1.19487	2.39945	1.50385e-11	3.79129e-10
GPHA2	2.64844	0.420206	1.55803e-11	3.90779e-10
FKBP10	1.08469	2.75505	1.55829e-11	3.90779e-10
RCN3	1.08251	3.42592	1.6024e-11	4.01135e-10
NSG1	1.71338	0.00913478	1.69967e-11	4.24739e-10
IL4R	-1.0514	3.1867	1.87441e-11	4.65952e-10
AQP3	1.12591	5.07983	1.98964e-11	4.92021e-10
FAM162B	1.17351	2.72657	2.11548e-11	5.21331e-10
RNY4	-6.64643	0.860808	2.13082e-11	5.24204e-10
GPX8	1.20328	0.484235	2.28188e-11	5.59434e-10
GDF15	1.68803	4.96563	2.3896e-11	5.84835e-10
HBB	2.75511	9.733	2.40911e-11	5.88598e-10
CTSE	1.38299	3.57391	2.56296e-11	6.21922e-10
PEBP4	-1.25153	5.55961	2.77934e-11	6.69864e-10
CORO6	-1.51482	0.928089	2.82121e-11	6.77661e-10
FOLR3	-2.28546	0.261927	2.83519e-11	6.78731e-10
HSD17B6	-1.18413	2.26806	3.26971e-11	7.78825e-10
FOXP3	1.98587	-0.230062	3.42606e-11	8.11993e-10
PROK2	-1.39822	0.183813	3.65147e-11	8.63979e-10
C19orf38	-1.06584	1.26074	3.70357e-11	8.74853e-10
REP15	-1.15356	0.508808	3.75242e-11	8.84926e-10
FAM150B	-1.20507	1.82643	3.79167e-11	8.92702e-10
TGFB3	1.35622	0.894885	3.93431e-11	9.21715e-10
CECR2	-1.27872	0.253543	4.16906e-11	9.7351e-10
MASP1	1.14249	0.979699	4.85186e-11	1.1274e-09
VSNL1	1.23205	0.417136	4.88694e-11	1.13186e-09
MEOX1	1.79487	-0.0884875	5.07922e-11	1.17449e-09
PTPN7	1.04533	0.728345	5.17128e-11	1.1918e-09
KL	-1.34283	0.209113	5.1792e-11	1.1918e-09
PTHLH	2.04764	-0.253579	5.29394e-11	1.21624e-09
C15orf59	1.07553	1.22009	5.68537e-11	1.2978e-09
WASF3	-1.0941	0.48807	5.93944e-11	1.35362e-09
SLAMF7	1.59756	1.71656	6.15807e-11	1.40121e-09
HABP2	2.2702	-0.368058	6.40774e-11	1.45337e-09
FGF7	1.22007	1.65966	6.92958e-11	1.56426e-09
GPNMB	1.17968	5.38576	7.02867e-11	1.58412e-09
TCAP	-1.51479	0.151936	7.3867e-11	1.66218e-09
TNFRSF13B	2.06526	0.162044	7.49561e-11	1.68101e-09
HBA2	2.48998	8.503	7.50576e-11	1.68101e-09
MT1JP	-2.32981	0.67203	7.67648e-11	1.71385e-09
ANKRD65	1.04825	2.21469	7.98759e-11	1.78052e-09
HSH2D	1.05198	1.31423	8.18482e-11	1.81849e-09
44075	1.15616	0.791401	8.20578e-11	1.81849e-09
HBA1	2.49429	8.61353	8.20899e-11	1.81849e-09
ITGA11	1.72866	0.211824	8.49083e-11	1.878e-09
MT1M	-2.13029	5.85087	8.72558e-11	1.92693e-09
ANTXR1	1.007	1.89054	8.77149e-11	1.93407e-09
FBN1	1.04793	0.754885	8.9028e-11	1.95095e-09
FN1	1.35582	1.41907	9.15841e-11	1.99774e-09
TAL1	-1.43212	0.00798348	9.27328e-11	2.0197e-09
OLFML2B	1.16053	1.66868	9.62756e-11	2.09366e-09
PRTN3	-2.43483	0.165836	9.97869e-11	2.16342e-09
ACE	1.04504	1.61694	1.07173e-10	2.31649e-09
LOC729737	-1.06985	1.39683	1.07365e-10	2.31712e-09
FAIM3	1.30711	1.0021	1.12969e-10	2.43439e-09
GP6	-1.89602	-0.358745	1.17052e-10	2.50721e-09
CLEC4G	3.42255	0.151236	1.18721e-10	2.53534e-09
HAS2	1.99544	0.329513	1.20438e-10	2.56814e-09
MIR490	-1.73189	8.05899	1.21876e-10	2.59105e-09
PF4V1	-1.77629	0.118733	1.2439e-10	2.63271e-09
RXFP4	-1.48302	0.182974	1.26677e-10	2.67714e-09
SERPINE2	1.33592	0.561235	1.30672e-10	2.75746e-09
KIAA1199	1.63378	0.76073	1.39517e-10	2.9311e-09
CGREF1	1.63562	0.134976	1.40613e-10	2.94976e-09
SOX4	1.13579	0.510943	1.41051e-10	2.9546e-09
IRF4	1.50528	0.517503	1.42296e-10	2.9763e-09
MSC	1.41255	0.691494	1.48073e-10	3.08556e-09
ADRA2C	-1.22438	0.489762	1.48169e-10	3.08556e-09
RSPO1	-1.51604	-0.0737867	1.5975e-10	3.31219e-09
TNFRSF25	1.06843	2.25929	1.61195e-10	3.3373e-09
WNT10A	2.23458	-0.357103	1.70674e-10	3.5233e-09
FIBIN	-1.34002	2.07585	1.78377e-10	3.677e-09
CHAC1	-1.21513	0.873316	2.06801e-10	4.23839e-09
RNU6-34	8.01359	2.41832	2.18781e-10	4.47105e-09
DGAT2	-1.16688	0.31091	2.2334e-10	4.55116e-09
STC2	-1.43592	0.481804	2.27943e-10	4.6383e-09
SULT1B1	-1.24269	0.483267	2.81577e-10	5.69714e-09
SCAMP5	1.30133	0.259563	2.86169e-10	5.77363e-09
QRFP	-1.07293	1.6162	2.96639e-10	5.96797e-09
LYPD3	1.38448	0.330584	3.89691e-10	7.73085e-09
LYVE1	-1.30617	2.71418	4.66866e-10	9.18513e-09
CCNB2	1.2574	0.297916	4.88115e-10	9.58994e-09
TSPAN7	-1.09813	3.25376	4.9541e-10	9.71985e-09
TFCP2L1	-1.05585	0.655299	5.06191e-10	9.89052e-09
LILRA5	-1.07116	0.44091	5.36168e-10	1.04619e-08
SCARA5	1.27064	1.37623	5.43588e-10	1.05922e-08
FLT1	-1.27361	0.110159	6.28332e-10	1.21796e-08
LIPA	1.16114	4.57031	6.36217e-10	1.22629e-08
SPDEF	1.70225	0.618425	6.64256e-10	1.27688e-08
TSPAN8	1.00771	2.59206	7.11758e-10	1.36635e-08
MIR3689D2	-5.36256	0.060611	7.47113e-10	1.43036e-08
SEC14L4	-1.34345	0.59736	7.54225e-10	1.44011e-08
KIAA0101	1.00065	0.711196	7.7119e-10	1.46816e-08
PLA2G7	1.16173	1.95667	7.72012e-10	1.46816e-08
OR5P2	-1.28537	1.56452	8.0818e-10	1.52271e-08
GP1BA	-1.75684	-0.041755	8.17972e-10	1.5371e-08
HIST1H3D	-1.10531	0.380345	8.27625e-10	1.55319e-08
AKAP12	-1.07773	0.896711	8.71749e-10	1.63169e-08
CD8B	1.12692	1.22741	8.96999e-10	1.67675e-08
UBE2C	1.09699	1.15334	9.34772e-10	1.74051e-08
CD300E	-1.48727	0.7	9.51717e-10	1.76555e-08
ITLN1	3.2962	1.50188	9.5194e-10	1.76555e-08
CSF2	-1.01482	1.27661	1.03666e-09	1.91272e-08
TREML3P	-1.44362	0.00223354	1.04702e-09	1.92934e-08
FDCSP	2.84547	-0.140837	1.06805e-09	1.96554e-08
STAP1	1.84028	0.0274922	1.10105e-09	2.02365e-08
C1orf106	1.07282	0.912344	1.10597e-09	2.03009e-08
SHE	-1.05735	0.428032	1.11697e-09	2.04764e-08
SIT1	1.223	0.744943	1.11916e-09	2.049e-08
LOC100288814	-1.39182	1.02244	1.21462e-09	2.21808e-08
C1QTNF3-AMACR	1.08371	0.523622	1.24193e-09	2.26505e-08
LINC00313	-1.76718	0.542279	1.31581e-09	2.39672e-08
MIR548F3	-5.59961	0.184772	1.62771e-09	2.95314e-08
RNU6-6	7.33741	1.81878	1.62913e-09	2.95314e-08
TMOD1	-1.01779	0.439355	1.65429e-09	2.99411e-08
RNU6-67	7.30645	1.7782	1.78628e-09	3.22481e-08
FAM153C	-1.39301	1.86267	1.81445e-09	3.27152e-08
EPHB2	1.2684	0.201571	1.91061e-09	3.42323e-08
INHBA	1.12809	2.48897	2.5237e-09	4.47667e-08
EFR3B	-1.76475	-0.289292	2.63012e-09	4.64806e-08
ASPA	1.11446	0.46328	2.65589e-09	4.6878e-08
BPIFB2	4.0899	1.48923	2.70809e-09	4.75635e-08
FMO3	1.05837	0.70857	2.71975e-09	4.76508e-08
CCR7	1.48279	0.235243	2.84871e-09	4.97877e-08
PTGDS	1.03571	6.28525	2.96515e-09	5.15069e-08
ADD2	1.9406	-0.240732	3.01042e-09	5.22295e-08
RS1	-1.32728	0.01953	3.09089e-09	5.34953e-08
CD53	2.14312	-0.289966	3.1016e-09	5.36156e-08
BHLHE22	1.66195	-0.156206	3.38276e-09	5.8053e-08
MIR4718	-5.41034	0.107709	3.54896e-09	6.06133e-08
VCAM1	1.56427	1.61323	3.7304e-09	6.34837e-08
HLA-DQB2	1.97717	-0.232507	4.01212e-09	6.79532e-08
CD5	1.15019	0.885306	4.19403e-09	7.07818e-08
MRPS21	1.63211	3.63584	4.33246e-09	7.30315e-08
CD209	1.65248	0.118029	4.4923e-09	7.5458e-08
BIRC5	1.43807	0.0577762	4.89612e-09	8.13773e-08
RASL11B	1.45307	0.0641555	5.24868e-09	8.71354e-08
OR5P3	-1.13863	0.877637	5.27191e-09	8.74193e-08
ST6GALNAC5	-1.1315	1.2599	5.30592e-09	8.78809e-08
OLFML2A	-1.18327	0.466204	5.57194e-09	9.19661e-08
CXorf21	1.04278	0.476503	5.59231e-09	9.21955e-08
LOC643441	-1.27782	0.52464	5.65438e-09	9.30034e-08
MIR1224	-5.28448	-0.00369166	5.85376e-09	9.60609e-08
DIRAS3	1.24865	0.173245	5.89005e-09	9.65453e-08
IL1RN	1.34898	1.36549	6.43924e-09	1.04584e-07
MIR548AO	6.86358	1.39434	6.67186e-09	1.07993e-07
RASGRP1	1.08699	0.41434	6.80909e-09	1.09964e-07
WNT3A	-1.43279	-0.16348	7.18651e-09	1.1553e-07
ATP1B2	1.55344	0.144742	7.25191e-09	1.16325e-07
PLA2G2D	2.24206	-0.266991	7.30048e-09	1.16972e-07
MS4A1	1.97378	0.0903119	7.71085e-09	1.23131e-07
CAPN5	1.34986	0.0486367	7.76333e-09	1.23831e-07
MIR4531	-5.20763	-0.0252317	8.07396e-09	1.28543e-07
MT2A	-1.41173	9.85493	8.17274e-09	1.2978e-07
HIST1H1B	1.01818	3.39058	8.38891e-09	1.33064e-07
ABCC3	1.02715	0.480729	9.30755e-09	1.46494e-07
ADAMTS12	1.21346	0.215521	9.59853e-09	1.50574e-07
GPER	-1.14248	0.674802	1.06329e-08	1.65525e-07
CYP3A5	-1.15464	0.858236	1.09067e-08	1.69417e-07
CD74	1.00731	6.74019	1.12166e-08	1.73662e-07
SPRR2D	2.12027	0.0157293	1.16106e-08	1.79178e-07
CAMK4	1.04732	1.03485	1.26778e-08	1.94384e-07
MAPK4	-1.44267	-0.186379	1.29043e-08	1.97432e-07
ITGB3	-1.04625	0.881709	1.2946e-08	1.97857e-07
LOC400043	1.12646	0.331414	1.33859e-08	2.04143e-07
CD180	1.17001	0.251881	1.39398e-08	2.11458e-07
AQP7P1	-2.09739	-0.295333	1.43843e-08	2.17967e-07
LOC100129148	-1.7478	-0.330825	1.45984e-08	2.20508e-07
SNAP25	1.81069	-0.328666	1.47001e-08	2.21495e-07
ELANE	-1.71287	1.15156	1.52515e-08	2.294e-07
DOK5	1.86378	-0.354465	1.60391e-08	2.40233e-07
ERG	-1.13809	0.144719	1.7144e-08	2.56243e-07
CHRNB1	1.91457	-0.378445	1.71864e-08	2.56607e-07
ANGPTL2	1.05799	1.3752	1.72727e-08	2.57626e-07
B3GNT3	1.7782	0.376464	1.74953e-08	2.60309e-07
LINC00312	-1.00377	0.589682	1.79735e-08	2.66681e-07
MIR5692B	6.5266	1.17184	1.81266e-08	2.68395e-07
IRAK3	-1.0016	0.347453	1.91974e-08	2.83366e-07
ZWINT	1.03512	1.30863	2.00374e-08	2.94544e-07
FKBP5	-1.30087	3.90607	2.19935e-08	3.21638e-07
TRO	1.1756	0.222958	2.406e-08	3.50279e-07
KCNJ11	-1.46287	-0.254757	2.64235e-08	3.81145e-07
GCNT3	1.54945	-0.136391	2.67284e-08	3.84831e-07
OR5E1P	-1.26721	1.87177	2.67469e-08	3.84831e-07
TSC22D3	-1.02408	6.21525	3.03635e-08	4.338e-07
TIMD4	2.41313	-0.299603	3.06522e-08	4.37047e-07
DNAJC22	1.66653	-0.278427	3.19899e-08	4.54754e-07
CACNG4	-1.08963	0.577545	3.25815e-08	4.61781e-07
MLXIPL	-1.30862	-0.137529	3.28569e-08	4.65222e-07
UBD	1.38062	1.17871	3.30592e-08	4.67622e-07
GPM6A	-1.08403	0.879665	3.63374e-08	5.08439e-07
EGR3	1.40127	0.678614	3.66245e-08	5.10949e-07
LIN7A	-1.17742	0.0356942	3.84635e-08	5.35034e-07
SSPN	1.24092	0.10348	3.90739e-08	5.42994e-07
GGT6	1.13469	0.254289	3.99522e-08	5.54658e-07
TNFRSF13C	1.91206	0.382572	4.02471e-08	5.57664e-07
KIAA1755	1.57426	-0.19374	4.03728e-08	5.58863e-07
GATA1	-1.35948	-0.170371	4.11008e-08	5.67287e-07
CCL5	1.10026	3.41175	4.1886e-08	5.77005e-07
AZU1	-1.7667	1.16823	4.33395e-08	5.95876e-07
CEACAM19	-1.05176	0.348105	4.78374e-08	6.55188e-07
CD248	1.20665	3.60477	4.89752e-08	6.68842e-07
UBASH3A	1.32564	0.268811	4.98888e-08	6.80015e-07
PLCH2	1.53772	0.162933	5.08898e-08	6.91014e-07
CMA1	2.50756	-0.0869058	5.23545e-08	7.08203e-07
MGC27382	-1.10724	2.0561	5.28074e-08	7.12762e-07
RGN	-1.05388	1.82203	5.57407e-08	7.47735e-07
MIR1281	6.14798	0.85169	5.57494e-08	7.47735e-07
GPR174	1.06885	2.02376	5.68294e-08	7.60787e-07
LOC100505622	1.25171	0.30621	5.80514e-08	7.75688e-07
CD1A	1.91547	-0.119435	5.94621e-08	7.93051e-07
IL18RAP	-1.38819	-0.160116	6.07835e-08	8.09916e-07
MT1E	-1.0669	6.46437	6.62363e-08	8.79282e-07
RBP5	1.33558	1.42919	6.80739e-08	9.01995e-07
COL6A6	1.08838	0.566773	6.83253e-08	9.04484e-07
ODF3L1	1.52995	-0.219031	6.90742e-08	9.12703e-07
CXCR2P1	-1.10423	0.316288	7.06902e-08	9.32325e-07
C1QTNF6	1.05793	0.626547	7.14044e-08	9.40004e-07
SIRPG	1.08975	0.579185	7.31676e-08	9.59668e-07
PGC	-1.12943	6.65566	7.55264e-08	9.88785e-07
MT1A	-1.88027	4.81312	7.59748e-08	9.9283e-07
MT1X	-1.35895	6.76096	8.03648e-08	1.04636e-06
F8	-1.6691	0.0460601	8.06981e-08	1.04878e-06
PVRIG	1.07291	0.699161	8.14396e-08	1.05649e-06
CTSG	1.70171	1.84735	8.60519e-08	1.11126e-06
SUCNR1	1.00797	0.433762	8.73338e-08	1.12476e-06
KRT14	3.02621	1.8471	8.81548e-08	1.13431e-06
BMP5	1.02873	0.672378	9.05063e-08	1.16037e-06
IL2RA	1.28453	0.00946189	9.06997e-08	1.1618e-06
COL6A3	1.20918	0.540972	9.23445e-08	1.18181e-06
RHOV	1.83107	0.863013	9.83155e-08	1.25036e-06
TMEM45A	1.09051	1.81048	9.90999e-08	1.25809e-06
CD207	1.46114	-0.0322699	1.03039e-07	1.30461e-06
SERPINB5	2.16502	-0.0221195	1.03709e-07	1.31076e-06
C11orf85	2.64072	0.210881	1.04269e-07	1.31668e-06
TNFSF13B	1.07851	0.469053	1.05123e-07	1.32628e-06
ECRP	-1.49263	-0.301302	1.07044e-07	1.34575e-06
OR2S2	-1.43361	0.0696695	1.08753e-07	1.36482e-06
RNF207	1.2164	0.525147	1.1041e-07	1.3844e-06
PLIN5	-1.07161	0.16416	1.11003e-07	1.39061e-06
LGALS2	1.39321	1.17098	1.14622e-07	1.43092e-06
TPSAB1	1.52431	2.28237	1.19073e-07	1.48388e-06
LRRN4	-1.171	2.09419	1.2246e-07	1.52364e-06
ZMAT3	1.10692	0.21475	1.26694e-07	1.57061e-06
GZMK	1.18992	0.987817	1.28839e-07	1.59442e-06
TPSB2	1.53078	2.34344	1.3146e-07	1.62545e-06
UGT1A6	1.7039	0.0276458	1.33746e-07	1.64941e-06
OGN	1.27573	0.890672	1.34645e-07	1.65907e-06
SH3PXD2A	1.12965	0.384538	1.35268e-07	1.66387e-06
TUBB2B	1.56998	-0.165038	1.36542e-07	1.6752e-06
SCRG1	1.30107	0.714142	1.38512e-07	1.6979e-06
ZNF683	1.49867	0.655372	1.4236e-07	1.74104e-06
KRT16P3	1.72109	0.429912	1.4459e-07	1.76633e-06
FXYD4	-1.30556	0.51842	1.45833e-07	1.77999e-06
IER3	1.09472	1.64297	1.48965e-07	1.80989e-06
PCP2	-1.00142	1.05508	1.49045e-07	1.80989e-06
HMCN1	1.34086	-0.0671049	1.58657e-07	1.91679e-06
MIR3115	-4.48029	-0.296967	1.58791e-07	1.91679e-06
CCL26	-1.45996	-0.243624	1.70166e-07	2.04544e-06
PLA2G3	-1.17247	-0.0193692	1.75457e-07	2.10548e-06
MMP9	1.77999	2.18941	1.84466e-07	2.20801e-06
TXNDC5	4.15684	1.38177	1.879e-07	2.24158e-06
SELE	1.75024	0.194084	1.93208e-07	2.30105e-06
C6orf58	4.06444	1.268	1.94314e-07	2.31229e-06
SNORA69	-1.0748	4.91519	1.96002e-07	2.33043e-06
ADAM28	1.50459	-0.120997	2.1406e-07	2.51782e-06
SLC4A11	1.36681	0.173915	2.16381e-07	2.54301e-06
HAMP	1.38317	1.64604	2.16719e-07	2.54489e-06
MIR4726	5.68603	0.527351	2.20174e-07	2.57908e-06
BLK	1.80591	-0.283669	2.36789e-07	2.75108e-06
MUC20	1.31616	1.77377	2.426e-07	2.80942e-06
BCHE	1.20567	0.0273728	2.46641e-07	2.85159e-06
MIR548I4	5.64396	0.519023	2.49291e-07	2.8734e-06
ALDH1A3	1.33824	-0.0905151	2.73014e-07	3.12606e-06
NIM1	-1.35577	-0.249604	2.90053e-07	3.31051e-06
CKMT1A	1.13242	0.209159	3.19297e-07	3.62107e-06
LOC100129480	1.14074	0.127326	3.2757e-07	3.70311e-06
TIGIT	1.36534	-0.158497	3.60311e-07	4.034e-06
SLC18A2	1.07881	0.18515	3.60522e-07	4.034e-06
LINC00340	1.17654	0.388202	3.69849e-07	4.13187e-06
OR52W1	-1.12658	0.103223	3.71268e-07	4.14446e-06
TNS4	1.85645	0.255364	3.8327e-07	4.2751e-06
CPT1C	1.17776	0.0743606	3.85263e-07	4.29397e-06
C3orf36	-1.03432	1.23943	3.93595e-07	4.37998e-06
COL28A1	1.48083	0.842901	4.0012e-07	4.44217e-06
LOC100130298	1.06601	0.294383	4.00853e-07	4.44338e-06
CLIC6	1.00585	2.15991	4.1192e-07	4.55542e-06
BIRC7	1.4929	0.175728	4.42699e-07	4.86559e-06
CXCR2	-1.34765	-0.259743	4.66679e-07	5.11336e-06
PDK1	1.29179	0.0236661	4.95819e-07	5.41599e-06
C15orf48	1.26132	2.35137	5.29359e-07	5.73835e-06
SLC19A3	-1.04055	0.574819	5.6037e-07	6.03776e-06
PDGFRL	1.00185	0.598307	5.61861e-07	6.04333e-06
HHIPL1	1.21923	-0.00245105	5.62161e-07	6.04333e-06
GNAO1	1.21101	0.00249365	5.62161e-07	6.04333e-06
S100A2	1.97625	4.52665	5.83326e-07	6.26142e-06
MS4A2	1.03016	0.559705	6.09054e-07	6.52283e-06
FAM83A	1.67704	-0.139438	6.17467e-07	6.60301e-06
C1QTNF2	1.4298	-0.231407	6.20508e-07	6.63055e-06
PVALB	1.3968	0.955594	6.35564e-07	6.78634e-06
FCER1A	1.36104	0.872998	6.4305e-07	6.86113e-06
FCRLA	1.76681	-0.347194	6.55475e-07	6.97603e-06
PCSK9	-1.11053	0.010846	6.89903e-07	7.32264e-06
ASPHD1	1.12828	0.0774798	6.90596e-07	7.32453e-06
MIR205HG	1.74669	1.91764	7.15974e-07	7.57115e-06
MIR4289	5.27579	0.307605	7.31476e-07	7.71789e-06
CD6	1.00397	0.62447	7.897e-07	8.29534e-06
LOC90246	-1.26381	-0.24798	8.05609e-07	8.43137e-06
SNORD114-14	5.22567	0.258931	8.62744e-07	8.97515e-06
MPC1L	-1.13633	-0.0876438	8.86486e-07	9.17668e-06
DCSTAMP	1.08887	0.533559	9.41502e-07	9.71794e-06
MIR548T	5.19294	0.26159	9.48264e-07	9.78064e-06
TAS1R3	1.44368	-0.192569	9.67331e-07	9.9485e-06
WDR86	1.38015	-0.220966	9.69059e-07	9.9519e-06
PTGS2	1.06999	1.14324	9.74521e-07	9.99357e-06
KLK1	-1.32092	-0.0609127	1.04123e-06	1.06166e-05
CLDN18	-1.06425	4.22153	1.04596e-06	1.06343e-05
SNORD36A	5.13928	0.212976	1.10801e-06	1.12331e-05
FAM83D	1.1712	0.603611	1.13194e-06	1.14594e-05
OLR1	1.01336	2.91899	1.14998e-06	1.16173e-05
ADRA1B	-1.38104	-0.339123	1.1637e-06	1.17475e-05
AGTR2	-1.36932	-0.001109	1.59709e-06	1.56889e-05
BAALC	-1.1146	-0.0793154	1.60784e-06	1.57837e-05
ALAS2	2.10187	-0.153134	1.67088e-06	1.63014e-05
GSDMB	1.48161	0.0884463	1.69106e-06	1.64757e-05
RRM2	1.02264	0.148857	1.69864e-06	1.65382e-05
RARRES1	1.1116	4.31991	1.70888e-06	1.66152e-05
F11	-1.11466	-0.0893877	1.76009e-06	1.70433e-05
ATP6V0D2	1.34975	0.197801	1.76944e-06	1.70989e-05
CPB2	-1.20753	1.46468	1.78482e-06	1.72242e-05
SNORD26	4.97549	0.102746	1.79399e-06	1.7301e-05
SUSD4	1.0391	0.157729	1.9196e-06	1.84002e-05
KLK5	-2.16317	-0.0257459	2.01656e-06	1.92648e-05
RLTPR	1.13528	0.0287862	2.10478e-06	2.00137e-05
TPX2	1.24394	-0.137703	2.17824e-06	2.0657e-05
TNFRSF4	1.00832	0.149528	2.19299e-06	2.07692e-05
OR2AE1	-1.04941	0.0125746	2.28548e-06	2.1488e-05
CLEC4D	-1.36064	-0.380913	2.3167e-06	2.17528e-05
SCGB3A1	1.49734	11.1792	2.38221e-06	2.23342e-05
TDRD10	-1.27548	-0.307628	2.42863e-06	2.26991e-05
APOH	-1.30819	0.220501	2.43423e-06	2.27305e-05
AIM2	1.16716	0.054212	2.43519e-06	2.27305e-05
SNORD74	4.84582	0.00639388	2.66166e-06	2.45867e-05
TNFAIP6	1.06664	1.76131	2.75581e-06	2.53578e-05
TMPRSS4	1.56459	0.600044	2.85078e-06	2.61978e-05
FOSB	1.47635	3.54184	2.92643e-06	2.68756e-05
LOC100128420	1.35289	0.547047	2.93863e-06	2.69703e-05
DEFB124	1.67133	1.44903	2.95557e-06	2.71083e-05
LOC728989	1.53245	-0.355296	3.01507e-06	2.76185e-05
DIO3	-1.03821	-0.0230638	3.14647e-06	2.86379e-05
BDKRB2	1.40955	-0.310779	3.20635e-06	2.9127e-05
MIR611	4.74553	0.0134345	3.50785e-06	3.17647e-05
LINC00092	-1.10667	-0.141305	3.52484e-06	3.18982e-05
MIR4489	4.73448	-0.0281839	3.69566e-06	3.3233e-05
MIR1908	4.73164	-0.0711293	3.69566e-06	3.3233e-05
PPBP	-1.40486	3.54269	3.92874e-06	3.51513e-05
CP	1.1955	1.27056	3.94449e-06	3.52701e-05
DHRS9	1.18917	1.77177	4.1312e-06	3.6778e-05
RHBDL2	1.15089	-0.00309066	4.20245e-06	3.73889e-05
DLGAP5	1.24075	-0.196674	4.47231e-06	3.9666e-05
HHIP	-1.10569	1.58619	4.49961e-06	3.98585e-05
FAM65C	-1.02189	-0.0255006	4.61043e-06	4.07136e-05
MIR548A2	4.64299	-0.0491644	4.84471e-06	4.25713e-05
IGSF9	1.2808	-0.247986	4.85978e-06	4.26511e-05
BDKRB1	1.66185	-0.340136	4.95194e-06	4.34331e-05
CLCA2	1.76298	0.0529526	5.00008e-06	4.37746e-05
PRELP	-1.00991	3.26639	5.02743e-06	4.39869e-05
PLXDC1	1.14912	-0.0641258	5.08046e-06	4.43691e-05
MIR4256	4.60083	-0.0596815	5.4257e-06	4.72106e-05
ERN2	1.58184	-0.072508	5.47211e-06	4.75563e-05
EYA2	1.15107	0.221528	5.64042e-06	4.89593e-05
METTL7B	1.02706	0.0428777	5.88641e-06	5.09212e-05
NRIP2	1.44867	-0.377616	5.94691e-06	5.13691e-05
MLLT11	1.00365	0.117319	6.00799e-06	5.18653e-05
GLI2	1.41097	-0.323224	6.26435e-06	5.385e-05
MIR302F	4.55449	-0.099637	6.27803e-06	5.3935e-05
MIR3151	4.52934	-0.113042	6.66478e-06	5.70925e-05
PI15	1.24201	-0.181695	6.93832e-06	5.92663e-05
MEIS3	1.12278	-0.0384985	7.04253e-06	6.00681e-05
TAS2R40	-1.02547	0.152916	7.22085e-06	6.14787e-05
MIR1204	4.4949	-0.142529	7.30164e-06	6.20923e-05
TFAP2A	1.44561	-0.0808283	7.79567e-06	6.56662e-05
SNORD65	4.47034	-0.176235	8.01523e-06	6.72769e-05
SPOCK2	-1.30489	-0.369335	8.57089e-06	7.15195e-05
IL4I1	1.07246	0.52485	9.08162e-06	7.55599e-05
MIR598	4.41219	-0.202918	9.40646e-06	7.78986e-05
WNT7A	-1.13553	-0.224257	9.64936e-06	7.97248e-05
KRT16P1	1.43878	-0.277298	9.6625e-06	7.97871e-05
FAM180A	1.05221	0.510436	9.76876e-06	8.05245e-05
DCLK1	1.16934	-0.14578	1.00249e-05	8.24453e-05
PLK1	1.20632	-0.211316	1.11214e-05	9.05736e-05
ALOX12P2	1.01703	0.496746	1.11682e-05	9.08512e-05
FAM171A2	1.3106	-0.281626	1.15521e-05	9.36533e-05
TINCR	-1.28319	-0.376091	1.17684e-05	9.51359e-05
CDKN2A	1.22737	-0.0881354	1.20941e-05	9.74366e-05
HLA-DMB	2.08799	-0.285745	1.34733e-05	0.000107454
CD302	-1.07168	1.15828	1.35973e-05	0.000108261
CKMT1B	1.14238	0.148984	1.38425e-05	0.000109968
CHIT1	1.68295	3.38853	1.40713e-05	0.000111661
EFNB3	1.10179	-0.111307	1.46521e-05	0.000115882
FENDRR	-1.07885	2.08934	1.48483e-05	0.000117369
CD1E	1.21705	-0.0359956	1.49407e-05	0.000117903
LOC100506393	1.3232	-0.311905	1.61153e-05	0.000125573
MIR4679-1	4.2138	-0.236884	1.70315e-05	0.00013199
SLC6A4	-1.02428	1.27256	1.7328e-05	0.000134141
TAGLN3	1.48723	-0.0493722	1.75584e-05	0.000135557
SNORD114-19	4.20566	-0.324109	1.76844e-05	0.000136234
VMO1	1.00788	3.08285	1.89443e-05	0.000145155
EPN3	1.23714	-0.0712909	1.9643e-05	0.000150104
COLEC10	1.42093	0.13255	1.98718e-05	0.000151771
IKBKG	-1.2275	-0.366034	2.00334e-05	0.000152924
GPC5	1.21627	-0.221874	2.01903e-05	0.000153792
SLC4A3	1.21612	-0.225439	2.01903e-05	0.000153792
TRIM29	1.55263	1.53003	2.04006e-05	0.000155228
DAPL1	1.24206	0.405868	2.0491e-05	0.000155749
MIR4440	4.13059	-0.327333	2.14531e-05	0.000162542
REM2	-1.19913	-0.169979	2.21647e-05	0.000167576
MIR3687	4.11958	-0.287914	2.2322e-05	0.000168477
GSTM1	1.48153	1.57176	2.35363e-05	0.000176727
KRTAP21-3	-1.62179	0.761118	2.36509e-05	0.000177494
TM4SF19-TCTEX1D2	1.25573	1.86119	2.4079e-05	0.000180611
MIR4323	4.08556	-0.305579	2.41939e-05	0.000180997
NUGGC	1.12235	-0.144653	2.42674e-05	0.000181356
CDC20	1.091	-0.147105	2.42674e-05	0.000181356
RNU5F-1	4.0615	-0.352781	2.62631e-05	0.00019393
ST8SIA6	-1.00173	-0.026312	2.64042e-05	0.000194871
SYCE3	1.23807	-0.251615	2.66397e-05	0.000196405
MIR4780	4.05152	-0.320715	2.73794e-05	0.000201442
SNORD114-3	4.04827	-0.297433	2.73794e-05	0.000201442
MIR3194	4.03959	-0.317713	2.85549e-05	0.000208689
EGFEM1P	1.15358	-0.227424	3.00627e-05	0.000218365
LCE1F	-1.2579	0.00323169	3.01779e-05	0.000218978
H1FNT	-1.11784	-0.190556	3.03649e-05	0.000220223
MIR3622A	3.99824	-0.324551	3.10983e-05	0.000224969
CCL21	1.07872	5.10331	3.30443e-05	0.000237599
PCDH7	1.20995	-0.261345	3.30895e-05	0.000237804
SCGB1A1	1.50366	12.1836	3.32964e-05	0.00023905
LOC100505633	1.28168	-0.33209	3.50721e-05	0.000249783
FUT2	1.25303	-0.290518	3.63201e-05	0.000257898
ORM1	-1.13251	1.88223	3.6515e-05	0.000259153
OSM	1.06734	0.526376	4.05451e-05	0.000285456
EGLN2	-1.3033	1.71426	4.17128e-05	0.000292768
CAPN13	1.20215	-0.189042	4.21062e-05	0.000295158
P2RY6	1.10018	-0.159354	4.22055e-05	0.000295708
MIR4695	3.89604	-0.36009	4.2517e-05	0.000297515
HLA-DOA	1.02498	-0.103691	4.46806e-05	0.000311351
MMP1	1.85748	0.0967277	4.62155e-05	0.000320182
SYT8	1.02667	1.73138	5.09435e-05	0.000349537
SYNPO	1.22675	-0.325305	5.10043e-05	0.000349618
CYP2F1	1.56378	1.62394	5.54006e-05	0.000375595
PRTFDC1	1.0745	-0.164464	5.54726e-05	0.000375726
MUC5B	1.49123	1.30066	5.58028e-05	0.000377783
C14orf37	1.00315	-0.0889326	5.83774e-05	0.00039223
SH3GL2	-1.06627	-0.279655	6.95659e-05	0.000459813
LOC644172	1.81967	1.46521	7.37628e-05	0.000486199
MEDAG	1.03411	0.272217	7.94076e-05	0.000519321
CILP	1.18343	-0.189784	8.81533e-05	0.000569459
S100A1	1.40401	1.72441	9.11225e-05	0.000587042
SOX2	1.22029	0.962789	9.22727e-05	0.000593378
HMOX1	1.27626	6.0476	9.76083e-05	0.00062515
CCDC162P	1.46961	-0.27603	0.000103225	0.000657572
BCAS1	1.03361	1.05459	0.000110082	0.000698134
PRSS21	1.04376	0.422636	0.000111067	0.000703442
BEX1	-1.00928	-0.242864	0.00011197	0.000707585
C12orf74	1.33273	1.54774	0.000112618	0.00071105
PRR4	2.51058	6.42386	0.000113107	0.000713192
LOC100505875	-1.04094	0.692711	0.000117789	0.000740747
HBD	1.40101	0.383117	0.000119596	0.000751444
SEC14L3	1.32013	-0.348851	0.00012093	0.00075849
TMEM156	1.08582	-0.209403	0.000121354	0.000760811
PPAP2C	1.06896	3.15299	0.000122502	0.000767338
LOC391322	-1.30737	1.69851	0.000133585	0.000830183
MSMB	2.0013	5.20239	0.000140665	0.000870008
CLDN10	1.22343	0.34683	0.000140972	0.000871153
PLEKHN1	1.07031	-0.246764	0.000154232	0.000942463
GPA33	1.06839	0.288732	0.000160037	0.000974593
APOBEC3B	1.13964	-0.360337	0.00016278	0.000988786
SLC2A5	1.14066	-0.345951	0.000170838	0.00103111
OR4K13	-1.07518	0.266237	0.000175713	0.0010565
BRSK1	1.12948	-0.327678	0.000178111	0.00107002
ZG16B	1.77265	1.84796	0.000185502	0.00110974
SDS	1.07498	0.654054	0.000198481	0.00117847
KAZALD1	1.06017	-0.263561	0.000199383	0.00118137
CDHR4	1.24499	0.973195	0.000200791	0.00118873
CARD17	1.02633	-0.248701	0.000202831	0.0012003
TYRP1	1.0429	-0.236613	0.000205586	0.00121459
CBLN3	1.0176	-0.21832	0.000207683	0.00122545
DEGS2	1.14993	1.01422	0.000210781	0.00124219
TCN1	1.99672	0.503844	0.000250236	0.00144599
KRTAP17-1	-1.04877	-0.331643	0.000256959	0.00147765
SLN	1.36845	1.08329	0.000258003	0.00148185
OR10G7	-1.08057	0.912353	0.000262279	0.00150278
APOBEC3A_B	-2.07511	-0.312563	0.000264765	0.00151519
KCNJ16	1.1343	-0.262154	0.000287953	0.00162827
OR10J3	-1.06528	0.0310625	0.000291187	0.00164329
MTVR2	-1.02894	0.386388	0.000294338	0.00165963
ANKFN1	1.05108	0.359528	0.000305969	0.00171854
KRT6A	1.63552	1.5931	0.00030947	0.00173342
APOA1	-1.00701	0.0552319	0.0003106	0.00173752
TNIP3	1.25791	0.168433	0.000312646	0.0017464
CDC45	1.06181	-0.335678	0.000317626	0.00177214
MUC4	1.2029	1.30898	0.000335214	0.00185285
OR11H2	-1.0592	0.871873	0.000342342	0.00188858
FOLH1	1.02654	-0.259173	0.00034801	0.00191722
SLC27A2	1.1119	0.418424	0.000376036	0.00205299
PROM1	1.29168	1.60243	0.000378551	0.00206435
FAM195A	-1.03621	0.61409	0.000384367	0.00209366
LCE3A	-1.10142	1.3963	0.000387154	0.00210642
NCAM1	1.10776	-0.377806	0.000396953	0.00215046
GJB5	1.28737	-0.246587	0.000405285	0.00218918
MCF2L2	1.11205	-0.346464	0.000422307	0.00226994
KRTAP2-2	-1.13901	-0.198479	0.000441988	0.00236235
OR5M11	-1.12505	0.217949	0.000478406	0.00253607
HOTAIRM1	1.0261	-0.158383	0.000502864	0.00264603
CRISP2	1.08542	-0.0320324	0.000551685	0.00287005
KRTAP13-1	-1.01898	-0.017081	0.000561756	0.00291075
NTS	1.21811	0.492159	0.000575653	0.00297842
PI3	-1.02822	2.03263	0.000629498	0.00320922
ALG1L	1.2484	0.348094	0.000646146	0.00328816
OR4X1	-1.01642	0.00793997	0.000656799	0.00333646
OR51G2	-1.0615	-0.277956	0.000661717	0.00336025
KRTAP4-2	-1.02357	-0.128541	0.000664267	0.0033696
PAX9	1.30973	0.0136448	0.000666723	0.00337724
SPOCK3	1.18672	0.000419083	0.000683114	0.00344801
LTF	1.48413	3.01032	0.00072679	0.00364906
ZCCHC18	1.00265	-0.32405	0.000758458	0.00378273
C8orf47	1.0718	1.09025	0.000773413	0.00385057
MIA	1.29854	1.69358	0.000834276	0.00412047
DLEC1	1.17601	0.0663114	0.000836675	0.00413089
GSTA2	1.51219	3.11013	0.000839648	0.00414412
EBLN1	-1.01079	-0.123844	0.000842825	0.00415405
ANKRD66	1.19249	2.95788	0.000860976	0.00423303
OR2T27	-1.00905	0.109297	0.000938386	0.00455879
OR2T4	-1.03511	0.0826767	0.000954371	0.00462069
ALDH3B2	1.01729	-0.118996	0.000994157	0.00478728
PIP	1.54346	1.88784	0.00100003	0.00481066
IFNA6	-1.02669	0.576002	0.00101873	0.00489734
SNORD47	-3.06465	0.344063	0.0010262	0.00492826
PLEKHG7	1.01998	-0.173168	0.00110102	0.00522764
UPK1B	1.39261	0.175996	0.00115048	0.00542357
FRMPD2	1.06595	0.0292827	0.00117471	0.00553143
OR52J3	-1.16445	0.130059	0.00118764	0.00558307
KRT15	1.10516	3.48917	0.00122303	0.00573052
SIX2	1.2717	0.0139773	0.00123877	0.00579858
CHST9	1.18428	1.91423	0.00131992	0.00612436
C7orf55	-1.18561	-0.171926	0.00147753	0.00674335
OR51S1	-1.024	-0.133043	0.0015773	0.00712789
CYP2A13	1.46097	0.350528	0.00162551	0.00731558
CHP2	1.38004	-0.181012	0.00183435	0.00808679
MMP10	1.4963	0.26059	0.00184826	0.00813805
ADAMDEC1	1.13162	-0.368952	0.00194911	0.00850586
CALCA	1.06335	-0.320855	0.00197527	0.00861183
KRTAP20-4	-1.08257	1.21521	0.00200732	0.00872247
KRTAP20-3	-1.00627	1.85948	0.0020551	0.00889752
MIR663A	-2.77109	-0.219596	0.00210517	0.00907566
BARX2	1.09786	-0.0690618	0.0022836	0.00971552
GRM7	1.06177	0.0766707	0.00235915	0.0100044
IGLL3P	1.28426	-0.275444	0.00242671	0.0102372
FGG	1.14753	2.80256	0.0024832	0.01044
MB	1.20293	0.726019	0.00260086	0.0108337
MIR4792	-2.76484	0.634613	0.00270305	0.0111763
GABRP	1.20273	-0.339098	0.00272056	0.0112376
KRT5	1.40063	3.45359	0.0027267	0.0112544
KRTAP19-5	-1.07704	2.93187	0.00275081	0.0113146
CCDC114	1.00935	1.18341	0.00285043	0.0116671
WBP1	1.30805	1.81274	0.00305577	0.0123409
SVOPL	1.00765	-0.270184	0.00314552	0.0126246
KRTAP19-7	-1.02305	4.30199	0.00317004	0.0127123
CYTL1	1.15531	0.757049	0.00398551	0.0153597
KLK12	1.14828	-0.190491	0.00406294	0.0156117
KRTAP19-2	-1.10118	5.47483	0.00418283	0.0159861
STOML3	1.0073	1.96811	0.00419427	0.0160089
CRABP1	1.07222	-0.267818	0.00420378	0.0160363
CSF3	-1.01185	1.18002	0.00438848	0.0166204
C9orf117	1.12249	2.71956	0.00528237	0.0194223
ALOX15	1.05709	2.31404	0.00593028	0.0213634
SNORD80	-2.46181	-0.0544997	0.00596838	0.0214789
CCDC42B	1.04199	2.24038	0.00619662	0.0221938
CCL14	-1.24899	0.836303	0.00715375	0.0249079
MIR320A	-2.48292	1.29284	0.00727112	0.025221
SNORD38A	-2.3361	-0.236656	0.0083501	0.0283053
MIR1231	-2.39465	0.174543	0.00867008	0.0292023
MIR1234	2.64414	0.314083	0.00951943	0.031424
RNU6-53	-2.29889	1.07576	0.0120362	0.0380399
RNU6-71	-2.26709	0.436072	0.0125905	0.0393806
CHAD	1.10563	0.415145	0.0136111	0.041874
SNORD69	-2.18928	-0.0507251	0.0142147	0.0433008
MIR3134	-2.18398	0.0562758	0.0146823	0.04439
SERPINB11	1.037	0.180747	0.0151042	0.0453845
